# Supplementary material for: Republished study: long-term toxicity of a Roundup herbicide and a Roundup-tolerantgenetically modified maize
Source: Springer Nature journal article supplement (doi:10.1186/s12302-014-0014-5), 2014-06-23
Supplement: 12302_2014_14_MOESM1_ESM.XLS [file 12302_2014_14_MOESM1_ESM.XLS]

## Sheet: Month 15
GROUP	IDENT	RBC.15	Hct.15	Hgb.15	MCHC.15	MCH.15	MCV.15	WBC.15	Lymph.15	Mono.15	Neutro.15	Plt.15	Fibrin.15	APTT.15	PT.15	Cholest.15	Trigly.15	Glycem.15	Prot.15	Album.15	Glob.15	A/G.15	AST.15	ALT.15	Na.15	K.15	Cl.15	Ca.15	P.15	Urea.15	Creat.15	UCreat.15	UCreatex.15	UClair.15	UNa.15	UNaex.15	UK.15	UKex.15	UCl.15	UClex.15	UCa.15	UCaex.15	UP.15	UPex.15	UVol.15	UpH.15	Testo.15	Oestra.15	BW.15
1	8861	7.91	47.5	15.1	31.9	19.1	60.1	11.32	63.4	12.2	24.5	569	6.52	31.2	16.6	1.44	1.3	83	58	25.3	74.7	0.338688	62	36	110	3.6	76	86.2	36.4	0.26	6	882	10.584	1225	34	0.408	94	1.128	64	0.768	120	1.44	621	7.452	12	8	0.705073	0.02355	593.1
1	8887	8.48	53	15.9	30.1	18.8	62.5	11.92	75.4	8	16.5	470	3.66	19.9	16.3	1.5	2.84	123	67.6	29	71	0.408451	70	22	134	5.2	92	104.6	30.8	0.24	7	884	13.26	1315.48	52	0.78	116	1.74	72	1.08	212	3.18	656	9.84	15	7	0.572041	0.0385137	702
1	8890	8.28	52.4	15.2	29.1	18.4	63.3	9.6	72.8	9.8	17.4	605	4.01	36.1	17.3	1.3	1.7	71	70	36.6	63.4	0.577287	48	28	146	4.6	100	105.2	40.8	0.22	6.8	1330	14.63	1494.08	85	0.935	146	1.606	117	1.287	182	2.002	690	7.59	11	8	0.418047	0.0249592	813.9
1	9114	8.46	46	15.2	33	18	54.4	9.6	57.1	13.6	29.3	572	5.82	24	17.8	1.58	0.86	52	69.2	26.3	73.7	0.356852	72	30	146	4.8	100	101.6	39.2	0.38	7.8	1230	9.84	876.068	53	0.424	122	0.976	97	0.776	97	0.776	778	6.224	8	8	0.373253		568.2
1	9126	8.03	48.6	15.3	31.5	19.1	60.5	9.74	56.4	14.2	29.4	488	4.17	21.9	17.2	1.14	0.9	80	66	29.5	70.5	0.41844	54	30	132	4.4	90	97	35.4	0.2	6.6	1633	13.064	1374.58	60	0.48	137	1.096	100	0.8	122	0.976	460	3.68	8	9	1.47262		621.8
1	9129	8.36	47.5	14.4	30.3	17.2	56.9	11.38	58.2	13.1	28.8	628	5.16	25.1	16.8	1.48	1.42	63	70.4	27.1	72.9	0.371742	54	24	150	4.8	102	109	40.4	0.3	8	1366	13.66	1185.76	93	0.93	162	1.62	145	1.45	172	1.72	1050	10.5	10	8	0.231046		715.1
1	9330	7.98	47.6	14.9	31.3	18.6	59.6	10.49	70.7	9.7	19.6	667				1.7	1.36	56	71.2	32.7	67.3	0.485884	50	32	144	4.8	98	104.8	39.2	0.28	6.8	730	10.22	1043.71	35	0.49	81	1.134	74	1.036	91	1.274	434	6.076	14	9	0.39106		676.7
1	9331	8.08	48.6	15.5	31.8	19.1	60.1	10.2	61.1	14.1	24.7	657	6.03	34.7	17.5	1.66	1.98	59	60	23.7	76.3	0.310616	54	28	120	4	80	87.6	31.2	0.26	6.6	576	15.264	1606.06	44	1.166	79	2.0935	62	1.643	129	3.4185	518	13.727	26.5	8	0.45516	0.0209268	736.6
1	9528	8.32	50.7	15.6	30.7	18.7	60.9	9.11	79.2	8	12.8	455	3.44	17.2	18	1.08	1.16	74	68.8	32	68	0.470588	74	38	144	5.4	98	103.4	36.2	0.26	6.6	789	11.046	1162.25	61	0.854	94	1.316	96	1.344	82	1.148	423	5.922	14	9	0.749756		649.4
1	9576	8.09	48.8	14.6	30	18.1	60.3	8.68	68.2	12.4	19.4	587	4.17	38.5	16.8	1.34	1.88	90	69.2	30.9	69.1	0.447178	56	30	148	5	100	103.6	34.4	0.24	6.6	1033	11.8795	1249.95	61	0.7015	136	1.564	105	1.2075	165	1.8975	859	9.8785	11.5	8	0.379101		658.3
2	8863	8.22	50.8	15.4	30.3	18.7	61.7	8.24	77.6	8.1	14.4	698				1.58	1.7	71	64.6	34.1	65.9	0.517451	48	22	132	4.8	90	99.2	29.8	0.36	6.6	879	10.548	1109.85	40	0.48	90	1.08	74	0.888	131	1.572	478	5.736	12	8	0.509456		597.9
2	8894	6.34	46	14.7	32	23.2	72.6	10.12	76.2	6.9	16.9	737	2.65	19.1	18.1	1.62	1.06	48	65.4	31.9	68.1	0.468429	98	36	132	5.6	90	97.4	51.2	0.28	6.6	1080	10.8	1141.12	97	0.97	153	1.53	142	1.42	277	2.77	586	5.86	10	8	0.424409		563.3
2	9074	7.86	44.3	13.9	31.3	17.6	56.4	6.95	75.6	8.5	15.8	614	3.66	23.4	19.1	0.82	1.24	122	48.8	33.9	66.1	0.512859	82	40	114	4.6	78	76	27.8	0.24	5	758	10.991	1526.53	36	0.522	83	1.2035	55	0.7975	73	1.0585	519	7.5255	14.5	9	0.300573		596.3
2	9112	8.37	50.4	15.2	30.2	18.2	60.2	6.44	77.8	7.5	14.7	518	4.11	23.4	18.5	1.12	1.52	78	70.2	33	67	0.492537	66	32	142	5	96	102.8	33.2	0.28	6.6	740	13.69	1440.45	36	0.666	79	1.4615	55	1.0175	72	1.332	509	9.4165	18.5	7	0.232521		662.3
2	9136	8.44	50.6	16	31.6	18.9	59.9	8.83	67.7	10.8	21.4	530	4.73	20.4	18	1.68	1.54	113	68.2	26.4	73.6	0.358696	96	46	122	5	80	97.4	39	0.28	6	1088	9.792	1133.33	104	0.936	166	1.494	150	1.35	252	2.268	414	3.726	9	8	0.303996		563.6
2	9161	7.49	46.6	14.4	30.8	19.2	62.3	14.43	71.9	7.8	20.3	308				3.18	5.72	108	62.2	25.5	74.5	0.342282	52	26	128	4.4	84	101.8	49.6	0.74	12.4	447	18.774	1051.41	35	1.47	84	3.528	45	1.89	217	9.114	642	26.964	42	6	0.415948		865.2
2	9170	7.92	48	14.7	30.7	18.6	60.6	10	78.4	7.8	13.7	290	3.98	19.7	17.5	1.78	1.3	96	67.4	28.8	71.2	0.404494	142	70	142	4.6	92	102.6	37.6	0.34	6.4	821	12.315	1282.81	40	0.6	101	1.515	60	0.9	90	1.35	573	8.595	15	7	0.688316		567.7
2	9578	8.34	50.4	16.3	32.4	19.6	60.4	10.69	79.5	6.7	13.9	632				1.76	1.42	98	66.4	26	74	0.351351	66	30	144	5	96	102.8	33.2	0.34	7.6	678	12.882	1177.08	48	0.912	80	1.52	58	1.102	76	1.444	740	14.06	19	8	0.820408		695.9
3	8859	8.36	46.2	15.1	32.6	18.1	55.3	11.54	66	9.1	24.9	273	3.13	16.2	18.4	1.2	0.96	136	65.6	32.5	67.5	0.481481	76	28	140	5	92	99.6	33	0.28	6.6	1261	10.4663	1105.86	120	0.996	157	1.3031	150	1.245	195	1.6185	728	6.0424	8.3	8	0.99456		459.1
3	8893	8.53	51.8	15.7	30.4	18.4	60.7	11.83	72.5	8.7	18.8	563	4.28	21.9	18.3	1.62	2.08	86	72.8	33.8	66.2	0.510574	76	30	144	5	92	105.4	35	0.26	6.8	743	13.6712	1402	32	0.5888	74	1.3616	55	1.012	34	0.6256	690	12.696	18.4	8.5	0.0795432		616
3	9119	8.64	52.6	15.9	30.3	18.4	60.9	10.71	72.9	9.8	17.3	596	5.33	23.1	17.2	1.62	1.62	80	62.8	29.6	70.4	0.420455	60	32	128	4.2	84	93.2	33.6	0.26	6.2	2181	11.1231	1251.08	139	0.7089	278	1.4178	207	1.0557	240	1.224	1253	6.3903	5.1	9	0.0744228	0.0226415	580.2
3	9127	8.06	49.8	15.6	31.4	19.4	61.8	10.54	67.5	10.6	21.8	575	5.38	26.6	16.3	2.24	2.06	140	71.8	28.4	71.6	0.396648	64	44	146	4.8	96	111.2	35.4	0.34	7.4	875	13.5625	1276.3	116	1.798	146	2.263	127	1.9685	193	2.9915	935	14.4925	15.5	7	0.164168		598
3	9171	7.97	49.3	14.9	30.2	18.6	61.8	8.72	71.7	9.9	18.3	522	5.82	25.5	16.7	1.72	2.16	107	62.8	31.4	68.6	0.457726	56	28	120	4.4	82	94.6	25.8	0.28	6.6	1385	13.85	1462.36	161	1.61	236	2.36	187	1.87	280	2.8	1607	16.07	10	8	0.25824		766.3
3	9530	7.96	47.9	14.5	30.3	18.2	60.2	8.45	70.2	9.4	20.4	575	4.34	18.6	17.8	1.92	1.62	85	66.6	30.9	69.1	0.447178	62	28	142	5.2	94	99.6	29.2	0.34	7	1403	16.5554	1644.69	139	1.6402	196	2.3128	166	1.9588	231	2.7258	656	7.7408	11.8	8	0.11285		672.9
3	9573	8.09	48.8	15	30.6	18.5	60.4	8.21	71.8	10.3	18	601				1.84	2.02	60	60.8	23.8	76.2	0.312336	56	32	120	3.8	80	92.2	33.2	0.42	8.8	853	13.4774	1067.26	85	1.343	139	2.1962	110	1.738	233	3.6814	1102	17.4116	15.8	7	0.56122	0.0219886	635.2
4	8836	7.92	48.7	14.8	30.5	18.7	61.4	10.51	69.7	10.5	19.8	784	4.68	21.9	16.9	1.68	1.64	133	69.2	24.2	75.8	0.319261	70	38	142	4.6	92	104.8	35.6	0.26	6.8	748	14.2868	1459.03	55	1.0505	86	1.6426	68	1.2988	57	1.0887	714	13.6374	19.1	8.5	0.537491		631.4
4	8875	7.5	45.4	14.1	31.1	18.8	60.5	8.57	69.8	9.9	20.3	751	6.03	18.2	16.6	1.88	1.74	56	62.8	29.3	70.7	0.414427	42	30	126	4	84	94	35	0.44	7.8	661	14.0132	1246.75	52	1.1024	87	1.8444	60	1.272	162	3.4344	874	18.5288	21.2	6	0.749756	0.121652	663.9
4	8884	8.93	53.4	16.3	30.6	18.3	59.8	8.69	78.2	7.4	14.4	563	3.23	22.7	18.1	1.22	1.16	113	64.6	27.1	72.9	0.371742	60	26	134	4.2	90	99	34.6	0.3	6.2	1114	17.824	1995.03	86	1.376	131	2.096	96	1.536	120	1.92	472	7.552	16	7	0.452902		660.1
4	8885	8.12	47.8	15.1	31.7	18.6	58.8	8.41	72	10.2	17.8	612	5.69	21.5	17.1	1.54	1.36	93	62.4	25.1	74.9	0.335113	64	32	120	4	80	95.2	34.4	0.28	6.4	904	13.7408	1493.05	52	0.7904	109	1.6568	76	1.1552	124	1.8848	618	9.3936	15.2	9	0.620254		596.1
4	8891	7.23	45.6	14.1	30.9	19.5	63.1	10.58	74.8	8.2	17.1	686	4.96	21.1	16.7	2.2	2.54	78	62.6	28.9	71.1	0.40647	56	22	132	4.2	90	98	30.4	0.48	8.6	1147	9.7495	787.813	111	0.9435	178	1.513	150	1.275	136	1.156	1224	10.404	8.5	9	0.448418		540.9
4	8898	7.79	47.3	14.2	30.1	18.3	60.7	9.41	79.6	7.3	13.1	548	4.01	19.1		1.68	1.94	92	62.2	26.2	73.8	0.355014	60	34	120	4.4	80	93.6	38.2	0.28	6.8	1020	13.362	1366.48	110	1.441	165	2.1615	141	1.8471	226	2.9606	642	8.4102	13.1	8.5	0.480512		604.6
4	9347	8.02	49.5	15.8	31.9	19.7	61.7	12.03	73	8	18.9	584	4.49	17.6	19.1	1.46	2.1	184	66.6	25.9	74.1	0.349528	58	36	134	4.6	88	101.4	33	0.3	7	1020	9.69	769.048	43	0.4085	148	1.406	91	0.8645	144	1.368	1083	10.2885	9.5	8.5	0.174417		575.5
4	9508	8.13	50.4	15.7	31.1	19.3	62	10.54	68.7	9.2	22.1	460	4.11	21.1	17.1	1.02	1.04	108	61.6	28.5	71.5	0.398601	82	32	126	5	86	94.4	33	0.28	6.6	717	16.491	1732.76	28	0.644	82	1.886	32	0.736	78	1.794	779	17.917	23	7	0.282122		685.4
4	9572	8.72	53.9	16.1	29.9	18.5	61.8	9.01	74.4	8.8	16.9	479	1.65	20.2	18.2	1.12	1.32	108	58.4	26.1	73.9	0.35318	60	22	122	4.8	82	88.4	29.2	0.24	6.2	1086	13.3578	1494.09	72	0.8856	125	1.5375	94	1.1562	207	2.5461	643	7.9089	12.3	7	0.492383		654.8
5	8878	8.37	50	14.9	29.8	17.8	59.7	8.34	78.8	8	13.1	578	4.14	14.9	17.7	1.34	1.42	208	58.6	26.7	73.3	0.364256	58	36	130	5	88	92.2	24.8	0.24	6.2	1187	15.3123	1719.86	71	0.9159	138	1.7802	80	1.032	210	2.709	952	12.2808	12.9	6	0.238456		613.8
5	8880	8.47	50.9	15.1	29.5	17.8	60.1	12.68	68.7	10.8	20.6	815	5.75	21.1		1.92	1.6	70	73.8	22.8	77.2	0.295337	66	32	154	5.2	100	114.2	45	0.46	9.8	1030	15.45	1099.39	65	0.975	133	1.995	105	1.575	41	0.615	1316	19.74	15	10	0.133644		709.8
5	8886	8.42	53.8	15.5	28.7	18.4	63.9	11.58	71.9	9.7	18.3	582	4.04		17.5			59														1048	12.052		99	1.1385	155	1.7825	160	1.84	80	0.92	631	7.2565	11.5	10	0.99456		623.6
5	9108	8.45	51.4	15.2	29.7	18	60.8	8.35	76.9	8.4	14.7	730				1.4	1	61	65.2	27.6	72.4	0.381215	60	32	136	4.6	92	97.2	34	0.32	7.2	675	18.225	1762.71	25	0.675	68	1.836	49	1.323	30	0.81	719	19.413	27	10	0.356001		685.3
5	16417	8.28	48.4	14.7	30.3	17.7	58.5	12.4	62.3	11.3	26.4	956	5.06	21.2	17.4	1.76	3	94	69.2	25.6	74.4	0.344086	56	28	140	4	90	104.6	32.4	0.3	7.2	750	13.65	1322.06	35	0.637	81	1.4742	64	1.1648	38	0.6916	787	14.3234	18.2	12	0.365484	0.119775	692.8
5	9327	8.01	50.8	15	29.5	18.7	63.4	8.75	74.7	9.4	15.9	639	3.5	20.7	18.4	1.16	1.2	87	72.2	32.3	67.7	0.477105	64	38	148	4.8	100	103	32	0.24	7	1790	11.635	1157.48	119	0.7735	178	1.157	174	1.131	39	0.2535	1114	7.241	6.5	10	0.26294		643.9
5	9546	8.29	49.8	14.5	29.2	17.5	60.1	7.57	77.9	7	15.1	430	3.94	19.4	17.7	1.28	1.52	104	72.8	28.9	71.1	0.40647	116	54	152	6	102	112.8	32.8	0.28	6.4	1029	14.9205	1621.23	101	1.4645	141	2.0445	139	2.0155	83	1.2035	504	7.308	14.5	10	0.511924		638.2
6	16401	8.95	52.8	15	28.3	16.7	58.9	7.26	81.1	8.3	10.7	609	3.58	22.6	17.3	0.94	1.22	86	71.2	29.6	70.4	0.420455	60	30	150	5.4	102	106.4	33.4	0.28	7.4	972	15.7464	1481.82	51	0.8262	92	1.4904	70	1.134	46	0.7452	739	11.9718	16.2	10	0.545287		739.2
6	8882	7.89	48.9	14.5	29.8	18.4	61.9	9.93	78.7	8.1	13.2	256	4.39	21	16.7	1.48	2.1	80	71.4	27.1	72.9	0.371742	80	48	154	5.8	104	110	35.8	0.34	7.6	974	15.9736	1464.66	54	0.8856	109	1.7876	98	1.6072	79	1.2956	576	9.4464	16.4	10	0.812645		647.8
6	8888	8.46	51.4	15.2	29.5	18	60.8	8.12	71.4	9.8	18.7	726	3	17.9	18.2	1.16	0.76	49	57	32.3	67.7	0.477105	56	24	118	4.2	82	83.2	27	0.26	5.6	1003	11.6348	1447.83	57	0.6612	101	1.1716	85	0.986	61	0.7076	580	6.728	11.6	10	1.1533		562.3
6	8895	8.63	54	16.3	30.1	18.9	62.6	13.99	74.4	9.6	16	673	4.64	23	18.6	1.62	2.38	106	73	24.7	75.3	0.328021	68	40	150	5.2	100	113	32.2	0.34	7.4	1799	11.3337	1066.56	135	0.8505	198	1.2474	217	1.3671	59	0.3717	1207	7.6041	6.3	10	0.2475		610.2
6	9088	7.88	47.5	14.3	30.1	18.2	60.3	7.09	78.4	8.3	13.2	659	4.3	22.5	17.3	1.52	1.54	102	71.2	23.6	76.4	0.308901	62	34	146	5	96	107.2	38	0.32	7.4	826	15.1158	1423.47	33	0.6039	79	1.4457	49	0.8967	70	1.281	582	10.6506	18.3	8	0.1757		639.2
6	9106	7.95	48.5	15.1	31.2	19	60.9	9.12	72.8	10.5	16.6	629	4.81	17.5	17.2	1.94	1.98	97	70.4	33.3	66.7	0.49925	62	28	142	5	96	107.8	31	0.34	7.8	1079	13.4875	1204.16	54	0.675	118	1.475	78	0.975	57	0.7125	992	12.4	12.5	10	0.26294		680.8
6	9276	8.68	52.3	15.6	29.7	17.9	60.3	10.71	82	6	12.1	598	3.68	19.7	18.1	1	1.74	87	67	30.7	69.3	0.443001	60	36	132	4.8	88	97.2	29.2	0.26	6	1231	10.8328	1258.16	79	0.6952	131	1.1528	130	1.144	29	0.2552	1112	9.7856	8.8	10	0.187537		543.2
6	9335	8.09	48.7	15	30.7	18.5	60.2	9.21	78.8	8.3	12.8	678	4.77	19.9	17.9	1.88	2.48	74	72.2	26.7	73.3	0.364256	58	32	148	5.4	98	112.2	35.4	0.3	7.6	1784	15.164	1389.46	118	1.003	197	1.6745	135	1.1475	160	1.36	1410	11.985	8.5	9	0.403435		676.7
6	9548	8.31	51.2	15.4	30	18.5	61.7	11.23	73.2	9.4	17.4	587	3.6	20	18.2	1.22	1.46	92	71.6	31.6	68.4	0.461988	62	28	148	5.4	100	106	28	0.26	6.8	968	13.7456	1407.67	67	0.9514	99	1.4058	69	0.9798	93	1.3206	806	11.4452	14.2	9	0.691576		620.5
6	9595	8.58	53.9	16.3	30.3	19	62.9	8.56	74.3	9.5	16.1	465	3.94	19.8	17.9	0.92	0.96	139	69.6	32.4	67.6	0.47929	60	26	144	5.8	102	105	43	0.26	6.8	912	16.416	1681.14	56	1.008	115	2.07	82	1.476	30	0.54	1152	20.736	18	9	1.1768		760.1
7	8812	7.93	46.8	14.1	30.1	17.8	59.1	7.95	83.3	6.5	10.1	696	4.2	23.7	19.5	1.54	1.1	91	71.6	26.9	73.1	0.367989	72	44	150	5	102	106.8	41.2	0.3	7	996	9.96	988.782	65	0.65	111	1.11	114	1.14	83	0.83	324	3.24	10	10	0.231046		628.1
7	8851	8.05	49.3	15.3	31	19	61.2	8.99	76.6	9.2	14.2	608	5.01	23.4	16.9	1.6	1.3	71	72.4	27.8	72.2	0.385042	66	32	148	4.8	100	104.4	34	0.3	7.4	1244	13.8084	1296.73	86	0.9546	134	1.4874	117	1.2987	119	1.3209	794	8.8134	11.1	10	0.157889		584.8
7	8873	7.77	47.6	14.9	31.3	19.2	61.3	8.93	73.7	9.1	17.3	411	4.25	25.5	17.1	1.14	1.12	62	68.4	18.3	81.7	0.22399	64	26	144	4.8	100	102.6	42.6	0.28	6.8	528	17.424	1779.41	18	0.594	60	1.98	35	1.155	20	0.66	474	15.642	33	9	0.59712		635
7	8892	7.86	48	14.8	30.8	18.8	61.1	12.03	68.8	11.5	19.6	655	6.49	25.2	17.1	2.34	2.76	86	76	27	73	0.369863	72	24	160	5.2	106	118.4	46.4	0.36	9	674	10.784	833.256	59	0.944	99	1.584	74	1.184	68	1.088	992	15.872	16	8	0.235499		706.2
7	8897	8.93	55.8	14.8	26.5	16.6	62.5	8.26	79.2	8.1	12.8	813	3.41	21.8	17.6	1.08	1.4	66	70	32.8	67.2	0.488095	56	26	146	5.2	98	108.2	35.2	0.26	7	1861	13.9575	1385.63	99	0.7425	163	1.2225	145	1.0875	64	0.48	752	5.64	7.5	10	0.980144		653.3
7	9109	8.53	51.3	15.1	29.5	17.8	60.2	8.17	81.8	7.6	10.6	585	2.61	18.2	18.4	1.16	1.1	70	74.2	37.3	62.7	0.594896	62	28	148	5.4	100	108.8	34.6	0.26	7.2	1294	16.0456	1549.76	61	0.7564	132	1.6368	111	1.3764	34	0.4216	961	11.9164	12.4	10	0.389041		608.4
7	9174	8.16	44.8	14.7	32.9	18	54.9	22.85	51.5	10.8	37.7	758	5.38	28.7	17.6	1.68	1.44	66	73.8	30.2	69.8	0.432665	60	22	148	4.6	100	106.4	32.4	0.3	7.4	1691	17.0791	1605	65	0.6565	138	1.3938	98	0.9898	87	0.8787	585	5.9085	10.1	10	0.797359		635.7
7	9186	8.78	50.3	14.8	29.5	16.9	57.3	8.75	70.5	10.9	18.7	774	4.25	22.1	16.5	1.2	1.7	82	71.8	28.2	71.8	0.392758	50	24	148	4.8	100	104.2	35.6	0.28	6.8	879	16.4373	1680.98	63	1.1781	89	1.6643	80	1.496	84	1.5708	186	3.4782	18.7	10	0.314302		737.1
7	9333	8.2	49.6	15.2	30.7	18.6	60.5	8.81	78.5	7.6	13.9	710	2.3	30.8	17.5	1.6	1.86	74	73.4	30.8	69.2	0.445087	46	22	148	5	102	109.4	38.2	0.26	7	905	13.6655	1355.7	57	0.8607	84	1.2684	93	1.4043	50	0.755	729	11.0079	15.1	10	0.764073		719.2
7	9336	8.55	49.7	14.5	29.2	17	58.2	11.58	73.4	10.4	16.3	659	4.77	29.9	17.1	1.72	1.96	63	75.4	32.8	67.2	0.488095	56	30	152	5	104	112.4	43.6	0.34	7.8	1272	10.812	963.276	63	0.5355	150	1.275	126	1.071	91	0.7735	832	7.072	8.5	10	0.231046		689.1
8	8808	8.17	50.2	15.9	31.6	19.4	61.4	10.36	72.8	9.3	17.9	650	4.39	21.7	16.7	1.44	1.38	56	74.6	27.7	72.3	0.383126	58	28	150	5	102	109.4	36.8	0.32	7.6	1332	12.9204	1180.59	47	0.4559	132	1.2804	91	0.8827	92	0.8924	763	7.4011	9.7	10	1.36687		620.7
8	8814	8.3	53.2	15.6	29.4	18.8	64.1	9.18	64.6	11	24.5	584	4.32	44.6	15.8	1.44	1.54	47	72.4	24.9	75.1	0.331558	68	32	146	4.8	98	107	37.2	0.3	6.4	1847	12.3749	1342.76	70	0.469	161	1.0787	139	0.9313	63	0.4221	994	6.6598	6.7	10	0.511924		573.7
8	10234	8.42	50.8	15.5	30.4	18.4	60.4	6.99	77.7	7.6	14.7	553	4.47	37.6	16.4	1.64	1.94	79	69.8	26.4	73.6	0.358696	56	26	150	5	102	109.2	35.2	0.28	7.2	1018	16.4916	1590.62	54	0.8748	105	1.701	94	1.5228	84	1.3608	577	9.3474	16.2	10	0.669066		641.2
8	8877	8.32	49.9	15.1	30.1	18.1	60	7.98	64	12.1	23.8	642	6.1	27.7	16.1	1.76	0.88	71	68	29.3	70.7	0.414427	52	26	146	4.6	100	100	35.2	0.3	7.4	1164	11.9892	1125.11	91	0.9373	144	1.4832	128	1.3184	255	2.6265	472	4.8616	10.3	9	0.341109		602.9
8	8879	7.36	44.1	14	31.6	18.9	59.9	8.04	80.8	7.4	11.9	679				2.18	2	85	67.4	21.1	78.9	0.267427	44	30	148	4.6	100	110.6	38.4	0.34	8.8	919	10.8442	855.761	61	0.7198	135	1.593	110	1.298	103	1.2154	894	10.5492	11.8	10	0.844145		537
8	8881	8.58	54	15	27.8	17.5	62.9	7.89	71.4	9.8	18.7	666	4.04	31.4	16.5	1.62	1.42	47	73	29.6	70.4	0.420455	56	28	148	4.8	102	106	36	0.24	6.4	941	16.7498	1817.47	58	1.0324	107	1.9046	71	1.2638	179	3.1862	534	9.5052	17.8	10	0.405499		660.7
8	8896	7.66	47.8	14.6	30.5	19	62.4	8.7	67.2	12.2	20.7	726	4.14	28	16.2	2.56	3.46	67	70.8	21.7	78.3	0.277139	46	32	146	4.6	98	105.6	41.8	0.28	7.8	542	15.2844	1360.79	38	1.0716	69	1.9458	49	1.3818	100	2.82	520	14.664	28.2	8	0.629138		701.3
8	9118	8.15	51.9	15.7	30.2	19.3	63.7	8.04	81.1	6.3	12.5	328	3.17	21.4	17.7	0.94	1.68	71	68.8	32.4	67.6	0.47929	72	40	144	5	96	102.4	36.2	0.3	7	1954	14.655	1453.87	147	1.1025	184	1.38	168	1.26	138	1.035	579	4.3425	7.5	10	0.397123	0.0276434	589.2
8	9128	7.69	47.1	14.8	31.5	19.3	61.2	8.58	82.8	6.4	10.8	565	3.84	25.3	16.8	1.28	1.86	84	69.6	29.9	70.1	0.426534	52	26	148	5.8	100	107.2	36	0.26	7.2	1828	15.9036	1533.91	87	0.7569	168	1.4616	146	1.2702	64	0.5568	940	8.178	8.7	10	0.868678	0.0229751	679.8
8	9334	8.5	52.2	15.2	29.2	17.9	61.4	7.31	75.2	8	16.7	621	1.83	42.5	17.7	1.68	1.18	70	74	27	73	0.369863	48	32	148	4.8	100	106	37.6	0.3	7.2	1050	9.03	870.949	61	0.5246	94	0.8084	105	0.903	64	0.5504	228	1.9608	8.6	10	0.558532		606.4
9	18514	8.23	50.7	15.4	30.3	18.7	61.7	9.37	77.2	9	13.8	705	3.25	32.4	16.8	1.18	1.62	59	74.8	30.3	69.7	0.43472	56	34	150	5	102	110.4	35.4	0.32	7	2226	14.9142	1479.58	57	0.3819	192	1.2864	111	0.7437	68	0.4556	1194	7.9998	6.7	10	1.03924		583.6
9	8869	8.42	53.5	15.1	28.3	18	63.5	7.56	73.7	8.1	18.1	478	4.64	16.8	18	1.82	1.52	128	70.2	25.2	74.8	0.336898	44	28	148	5	100	109.8	34.4	0.26	7	961	6.5348	648.294	57	0.3876	136	0.9248	97	0.6596	194	1.3192	432	2.9376	6.8	10	0.608577		677.6
9	8889	8.17	53.1	14.9	28.1	18.3	65.1	7.34	74.5	8.9	16.6	680	4.32	31.1	17.1	1.22	1.5	56	72.2	24.8	75.2	0.329787	46	28	148	4.6	100	100.2	34.8	0.28	7	1281	15.6282	1549.34	48	0.5856	114	1.3908	93	1.1346	42	0.5124	827	10.0894	12.2	10	0.635126		669.2
9	8899	8.54	49	14.7	30	17.2	57.4	11.67	68.7	10	21.3	826	4.82	28.7	17.3	2.12	2.32	74	71.8	23.5	76.5	0.30719	58	30	146	5.2	98	107.2	45.6	0.36	7.4	1052	12.9396	1214.3	58	0.7134	133	1.6359	92	1.1316	58	0.7134	1238	15.2274	12.3	10	0.594291		596.4
9	9117	7.06	42.1	13.2	31.3	18.7	59.7	10.14	67.3	9.4	23.3	490	7.34	21.9	15.8	2.52	2.3	64	72.2	20.5	79.5	0.257862	48	28	150	4.6	100	113	50.6	0.58	10.8	882	13.3182	856.366	42	0.6342	127	1.9177	56	0.8456	189	2.8539	812	12.2612	15.1	8	0.244448		680.5
9	9257	8.59	53	14.9	28	17.3	61.7	8.69	75.3	8.6	16.1	815	4.38	27.4	17.5	1.42	1.72	90	73.4	28.6	71.4	0.40056	64	32	148	5.4	100	107.8	36	0.26	7	1803	13.5225	1341.52	99	0.7425	166	1.245	165	1.2375	108	0.81	801	6.0075	7.5	10	0.401382		619.9
9	9300												4.14	23.6	17.2	1.22	1.22	81	71.4	23.5	76.5	0.30719	84	46	146	5	98	105.6	43	0.32	7.2	871	8.71	840.085	65	0.65	120	1.2	100	1	128	1.28	478	4.78	10	10	1.07042		676.9
9	9329	8.05	48.4	14.5	29.9	18	60.1	10.07	69.9	10.2	19.8	862	6.17	22.5	17	1.72	1.34	69	73.6	26.8	73.2	0.36612	40	26	146	4.6	98	109.6	41.8	0.28	6.8	1284	10.7856	1101.47	48	0.4032	108	0.9072	69	0.5796	97	0.8148	762	6.4008	8.4	10	0.583066		632.7
9	9533	8.56	51.6	15.3	29.6	17.9	60.3	7.54	79.3	7.7	13	595	3.63	30.4	17.1	1.24	0.78	46	69.2	27.1	72.9	0.371742	58	28	146	4.8	100	103.6	35.4	0.28	6.8	1306	7.0524	720.221	82	0.4428	145	0.783	125	0.675	81	0.4374	519	2.8026	5.4	12	0.397123		517.6
9	9598	8.34	52.6	14.8	28.1	17.7	63.1	8.27	72.2	9.1	18.7	607	2.68	29	17.6	1.2	1.34	60	70.2	28.1	71.9	0.390821	50	28	138	4.4	94	104.2	38.2	0.24	6.4	1262	12.62	1368.41	83	0.83	121	1.21	132	1.32	81	0.81	599	5.99	10	10	0.415948		581.3
10	8813	8.15	51.4	15.3	29.8	18.7	63	8.55	65.9	8.9	25.3	682	5.89	29	16	1.74	0.96	63	74.8	30.6	69.4	0.440922	44	26	146	4.6	102	103.4	37.2	0.4	7.8	2532	12.1536	1082.05	133	0.6384	209	1.0032	170	0.816	437	2.0976	903	4.3344	4.8	8	0.430868		522.7
10	8864	8.34	52.1	15.1	29	18.1	62.5	8.66	66.9	11.3	21.6	748	4.01	37.2	17.3	1.12	1.32	67	72.2	29.4	70.6	0.416431	56	24	148	5	102	105.8	37.2	0.28	6.4	2355	12.246	1328.78	62	0.3224	158	0.8216	92	0.4784	245	1.274	538	2.7976	5.2	8	0.323098		575
10	8883	7.99	49.5	15.4	31.1	19.2	61.9	11.59	72	9.4	18.7	641	5.82	27.8	16.4	1.76	0.92	62	76	22.3	77.7	0.287001	62	34	150	4.6	102	108.4	35.6	0.4	7.2	2227	11.3577	1095.46	135	0.6885	225	1.1475	156	0.7956	287	1.4637	1178	6.0078	5.1	7	0.104004		515.2
10	9105	8.23	49.1	15.1	30.8	18.4	59.7	9.32	70.7	10.4	18.9	644	3.35	24.9	16.8	1.36	1.12	60	67.8	27.7	72.3	0.383126	58	30	148	5	100	103.8	37.2	0.38	6.6	2269	13.614	1432.45	206	1.236	269	1.614	237	1.422	84	0.504	1832	10.992	6	10	0.459873	0.0779359	572.6
10	9107	8.07	50.1	14.9	29.8	18.5	62.1	10.49	68.3	9.6	22.1	648	3.45	27.5	16.9	1.74	1.48	81	70.6	23.7	76.3	0.310616	54	28	148	4.8	100	110	37.2	0.36	6	2084	13.546	1566.74	112	0.728	219	1.4235	154	1.001	83	0.5395	1571	10.2115	6.5	10	0.848182	0.066235	557.1
10	9111	7.85	49.1	14.6	29.7	18.6	62.6	8.7	65.9	11.7	22.4	632	4.77	34.7	17.6	1.54	1.12	32	69.4	31.6	68.4	0.461988	46	30	148	4.8	102	106	38.8	0.38	6.6	2676	13.9152	1464.14	116	0.6032	262	1.3624	199	1.0348	207	1.0764	958	4.9816	5.2	9	0.468834	0.0677135	460.7
10	16412	7.75	47.7	14.6	30.6	18.8	61.5	10.72	62.2	10.2	27.6	625	4.11	26	16.1	1.3	0.92	48	72.6	28.3	71.7	0.3947	56	32	144	4.8	100	104	38.2	0.32	7	2818	8.454	838.69	125	0.375	309	0.927	152	0.456	258	0.774	2086	6.258	3	7	0.898262	0.052137	544.3
10	9263	7.99	47.6	15.1	31.6	18.8	59.6	15.2	70.2	10.1	19.6	614	4.68	26.3	18.1	1.18	1.1	116	70.8	24.7	75.3	0.328021	80	46	148	5.6	102	105.6	40.2	0.3	6.8	1794	7.176	732.335	183	0.732	223	0.892	247	0.988	224	0.896	438	1.752	4	10	0.332014	0.0313464	487.2
10	9532	8.06	48.2	14.9	30.9	18.4	59.8	11.56	64.7	12.5	22.8	685	4.41	26.1	17.3	1.54	1.24	64	71.8	28.4	71.6	0.396648	72	26	148	4.8	100	105	36.2	0.42	8.2	2885	11.54	977.304	93	0.372	215	0.86	138	0.552	92	0.368	1939	7.756	4	10	0.292182	0.0856141	567.4
10	9585	8.05	48.2	15.1	31.4	18.8	59.8	7.62	70.6	8.9	20.4	715	4.14	24.9	16.3	1.44	0.94	52	71.2	26	74	0.351351	94	42	152	4.6	104	106.4	40.2	0.46	7.2	3472	8.68	837.191	103	0.2575	256	0.64	92	0.23	272	0.68	2632	6.58	2.5	8	0.264499		383.7
11	8771	7.26	45.6	13.1	28.7	18	62.9	1.69	50.5	3.3	46.2	487				1.46	2.14	73	79.6	37.4	62.6	0.597444	82	46	142	4.8	98	104.4	29.8	0.28	7	1784	4.2816	424.173	49	0.1176	105	0.252	70	0.168	337	0.8088	1184	2.8416	2.4	7	0.132277	0.068642	372.9
11	8787	7.36	46.2	13.7	29.6	18.6	62.8	4.69	78.8	7.4	13.8	519				0.98	1.28	64	72	34.7	65.3	0.531394	86	36	144	4.8	100	99.8	39.2	0.24	7	629	10.5672	1048.33	36	0.6048	62	1.0416	35	0.588	109	1.8312	823	13.8264	16.8	7	0.155072	0.164018	402.8
11	8789	8	45.2	12.8	28.4	16.1	56.5	3.07	90.7	1.6	7.8	249	2.61	20.9	19.4	1.06	0.98	113	65.4	36.6	63.4	0.577287	90	36	142	5	100	97.8	38	0.26	7	834	12.093	1199.7	39	0.5655	77	1.1165	48	0.696	198	2.871	958	13.891	14.5	7	0.115457	0.102793	498
11	8820	7.3	43.5	13.4	30.9	18.4	59.5	3.67	75.4	8.3	16.3	491	2.99	24.2	19.9	1.06	0.94	94	65.6	33.4	66.6	0.501502	52	28	146	4.6	102	95.4	38.4	0.26	6.4	760	9.12	986.842	55	0.66	86	1.032	60	0.72	211	2.532	1217	14.604	12	7	0.255459	0.113049	394.8
11	8837	7.31	44.3	13.5	30.5	18.5	60.8	4.92	72.6	9.2	18.1	568	3.08	24.1	21	0.8	2.5	106	67.6	35.9	64.1	0.560062	62	38	140	4.4	98	96.2	42.2	0.28	6.6	855	11.115	1169.51	44	0.572	89	1.157	45	0.585	360	4.68	1270	16.51	13	7	0.0930784	0.137615	480.9
11	9055	7.81	46.3	13.8	29.7	17.6	59.3	4.9	70.7	8.9	20.6	480				0.94	1.04	59	70	34.5	65.5	0.526718	74	38	142	4.8	98	96	25.2	0.34	6.8	811	9.1643	934.599	81	0.9153	107	1.2091	88	0.9944	124	1.4012	932	10.5316	11.3	7	0.152139	0.126628	349.9
11	9062	8.13	48.8	14.3	29.2	17.6	60.1	5.02	77.7	7.9	14.4	477				1.1	0.96	62	68	36.3	63.7	0.569859	68	38	142	4.8	98	98.2	36	0.26	7	774	9.4428	936.786	62	0.7564	110	1.342	71	0.8662	174	2.1228	544	6.6368	12.2	8	0.169125	0.195745	402.1
11	9147	7.4	44.9	13.8	30.8	18.7	60.6	5.65	73.3	8.1	18.6	223				0.82	0.86	123	65.8	34.5	65.5	0.526718	58	34	142	4.4	102	96.6	40.2	0.24	6.4	483	9.66	1045.27	32	0.64	56	1.12	31	0.62	103	2.06	638	12.76	20	7	0.146354	0.113049	415.1
11	9282												3.23	21.9	19.3	1.36	1.02	77	68.4	29.3	70.7	0.414427	74	34	144	4.8	100	96.6	24.6	0.32	7	1098	11.8584	1176.43	53	0.5724	115	1.242	61	0.6588	276	2.9808	1511	16.3188	10.8	7	0.188152	0.0937843	409.4
11	9313	6.71	41.8	12.3	29.5	18.4	62.4	3.8	68.7	9.4	21.9	223	2.24	21.9	19.7	1.42	2.08	77	75.2	37.8	62.2	0.607717	86	42	144	4.8	98	101.8	33.2	0.28	6.6	656	6.56	690.236	22	0.22	37	0.37	32	0.32	269	2.69	597	5.97	10	8	0.13881	0.138285	329.9
12	9061	7.52	43.4	13	30.1	17.3	57.7	4.64	76.3	8.3	15.4	639	2.89	23.8	18.1	1.28	2.02	75	79.6	33.9	66.1	0.512859	102	48	142	5	96	106	32.4	0.36	7.2	843	11.802	1138.31	73	1.022	99	1.386	71	0.994	252	3.528	1158	16.212	14	7	0.191445	0.162431	460.2
12	9063	7.4	45	13.2	29.4	17.9	60.8	3.21	74.6	8.2	17.1	543	2.03	20.3	18.5	1.24	1.02	72	66.6	36.8	63.2	0.582278	64	38	144	4.2	100	97.2	39.6	0.3	7.2	1920	8.256	796.296	95	0.4085	154	0.6622	87	0.3741	572	2.4596	1672	7.1896	4.3	7	0.259457	0.105928	356.4
12	9152	7.4	45.6	13.7	30	18.5	61.7	1.1	39.1	2.7	58.2	533				1.22	2.06	84	72.6	35	65	0.538462	86	46	148	5.4	98	103.2	29	0.34	6.6	424	6.784	713.805	30	0.48	40	0.64	31	0.496	268	4.288	522	8.352	16	7	0.0272853	0.179124	385
12	9196	7.65	45.3	13.8	30.5	18.1	59.2	4.71	77.4	7.7	14.9	507	2.35	22.2	20	0.98	1.1	60	66.6	33.6	66.4	0.506024	88	50	146	5.2	100	99.8	31.2	0.36	7.4	826	8.9208	837.162	86	0.9288	130	1.404	90	0.972	260	2.808	1185	12.798	10.8	7	0.173271	0.145225	341.6
12	9259	7.43	40.1	12.2	30.5	16.4	54	4.92	77.8	7	15.2	553	2.11	21.9	17.9	1.56	2.12	83	73	34.9	65.1	0.536098	80	38	146	5	98	101.6	29.4	0.34	6.4	674	7.414	804.47	50	0.55	79	0.869	50	0.55	272	2.992	808	8.888	11	7	0.0272853	0.125398	351.7
12	9339	7.84	45.8	13.9	30.3	17.7	58.5	4.91	75.4	9.3	15.2	555	2.82	25.9	19.6	1.1	1.14	78	69.2	33.8	66.2	0.510574	80	44	142	5	100	100.2	38.4	0.2	6.2	648	10.368	1161.29	52	0.832	79	1.264	60	0.96	162	2.592	944	15.104	16	7	0.167089	0.100192	482
12	9343	6.54	38.2	11.5	30.1	17.5	58.3	6.87	64.2	12.9	23	653	3.89	20.5	20.2	1.58	1.48	97	71.6	29.4	70.6	0.416431	128	42	146	4.8	98	102.6	39.4	0.34	6.2	528	11.088	1241.94	40	0.84	90	1.89	50	1.05	148	3.108	982	20.622	21	7	0.251523	0.0813883	493.6
12	9344	9.05	52.3	15.9	30.4	17.5	57.7	5.72	69.3	10.1	20.7	635	2.16	21.3	19	1.74	2.26	92	74.8	30.8	69.2	0.445087	70	42	144	5	98	102.2	19.8	0.32	7.2	690	10.35	998.264	68	1.02	95	1.425	72	1.08	275	4.125	1079	16.185	15	7	0.144454	0.124181	379.8
12	8797	7.43	43.5	13.9	32	18.7	58.6	7.83	80	5.6	14.4	549	1.72	22.1	18.3	1.4	1.14	69	78.2	36.2	63.8	0.567398	74	36	148	4.6	100	105.6	30.4	0.24	6.6	458	7.786	819.234	30	0.51	42	0.714	35	0.595	153	2.601	219	3.723	17	10	0.199325	0.158538	327.8
12	9597	7.78	45.2	13.4	29.6	17.2	58	6.3	78.2	7.7	14	359	1.9	20.3	18.2	1.5	1.86	84	74.6	37.5	62.5	0.6	108	36	148	4.8	96	107.4	35.4	0.3	6.2	1226	6.743	755.264	67	0.3685	114	0.627	73	0.4015	675	3.7125	1733	9.5315	5.5	7	0.181694	0.176519	394.3
13	8761	7.75	43.4	13.4	30.9	17.3	55.9	6.2	79	6	14.9	315	3.03	29	18.3	1.22	1.5	89	69.2	32	68	0.470588	88	40	144	5.6	98	98.6	32.4	0.36	6.8	566	10.4144	1063.56	78	1.4352	102	1.8768	117	2.1528	133	2.4472	245	4.508	18.4	10	0.107791	0.121172	427
13	8765	7.39	44.3	13.4	30.3	18.1	59.9	5.48	72.7	9.6	17.7	806	3.76	22.1	17.5	1.88	1.74	67	71	30.6	69.4	0.440922	68	22	146	4.4	96	103.4	38.2	0.34	6.2	501	9.018	1010.08	36	0.648	60	1.08	37	0.666	156	2.808	807	14.526	18	7	0.127768	0.0894957	473
13	8766	6.98	42.2	12.3	29.2	17.7	60.5	3.25	59.5	7.2	33.4	612				1.28	2.96	89	73.4	36.3	63.7	0.569859	80	40	142	4.8	94	98	26.4	0.36	7	416	6.1568	610.37	52	0.7696	60	0.888	65	0.962	277	4.0996	403	5.9644	14.8	7	0.2073	0.108609	359.2
13	8831	7.74	44.2	13.7	31	17.7	57.2	5.74	73	8.3	18.8	693				0.96	1.46	81	70	29.3	70.7	0.414427	122	64	146	5.2	98	103.2	30.4	0.34	7.4	951	7.0374	660.417	147	1.0878	183	1.3542	147	1.0878	250	1.85	1129	8.3546	7.4	7	0.145402	0.102279	391.4
13	9148	7.99	45.8	14.1	30.7	17.6	57.4	2.07	46.9	6	47.2	302	2.91	22	19.6	1.1	1.88	87	72.4	29.5	70.5	0.41844	102	46	144	5.8	98	101	33.2	0.38	7	827	9.5932	951.706	80	0.928	103	1.1948	85	0.986	173	2.0068	774	8.9784	11.6	7	0.2073	0.117602	488.7
13	9264	7.85	45.1	14.1	31.3	17.9	57.4	5.48	78.8	6.2	15	542	2.74	23.8	19.7	1.04	1.64	56	66.8	34.8	65.2	0.533742	70	38	144	5.4	102	102	30.6	0.26	6.6	827	9.3451	982.598	50	0.565	83	0.9379	59	0.6667	252	2.8476	560	6.328	11.3	7	0.177445	0.171427	444.2
13	9323	7.52	44.6	13.1	29.3	17.4	59.3	1.53	35	15.3	49.7	640	2.1	21.3	18.8	1.52	2.58	52	75.6	35.9	64.1	0.560062	76	44	144	4.4	96	102.8	24	0.3	7.8	612	6.6708	591.855	80	0.872	102	1.1118	92	1.0028	355	3.8695	822	8.9598	10.9	7	0.0883379	0.153924	338.5
13	9326	7.42	43.9	13.4	30.4	18	59.1	4.44	73.9	7.7	18.3	475	3.31	22.5	19.5	1.22	0.92	69	67	31.1	68.9	0.451379	72	32	144	5	98	96.6	26.6	0.32	6.6	492	8.0688	848.99	49	0.8036	71	1.1644	63	1.0332	218	3.5752	516	8.4624	16.4	7	0.158047	0.144522	409.4
13	9340												4.04	20.5	18.9	1.7	3.82	92	72	28.6	71.4	0.40056	70	34	146	4.4	98	100.2	29.8	0.3	6.4	379	8.8686	962.305	37	0.8658	58	1.3572	45	1.053	172	4.0248	441	10.3194	23.4	7	0.116321	0.134967	464.2
13	9511	8.52	49	14.6	29.8	17.2	57.6	7.17	74.9	9	16.1	848				2.54	7.38	50	76.2	27.5	72.5	0.37931	70	46	146	4.6	92	108.6	38.4	0.3	7	349	8.7599	869.038	18	0.4518	46	1.1546	21	0.5271	250	6.275	576	14.4576	25.1	7	0.076772	0.098679	342.2
14	8782	7.63	47.1	13.8	29.2	18	61.7	4.14	72.9	9.2	17.8	526				1.46	3.58	64	73	38	62	0.612903	78	42	144	5	96	102	26	0.34	6.8	399	7.2618	741.605	45	0.819	58	1.0556	53	0.9646	161	2.9302	517	9.4094	18.2	7	0.145402	0.134313	383.5
14	9054	7.61	45	13.4	29.8	17.6	59.1	7.56	71.9	9.5	18.5	612				1.44	2.38	69	77.6	38.8	61.2	0.633987	76	38	148	4.8	98	106.6	34.4	0.3	6.6	340	6.664	701.178	54	1.0584	60	1.176	59	1.1564	162	3.1752	220	4.312	19.6	7	0.247623	0.150968	366
14	9059	7.94	45.8	14	30.6	17.7	57.8	4.29	74	8.9	17	577	3.27	18.5	18.6	1.36	2.16	61	70.2	34.1	65.9	0.517451	84	42	144	5	98	101.2	33.8	0.36	6.8	828	5.796	591.912	68	0.476	107	0.749	80	0.56	226	1.582	1148	8.036	7	7	0.205012	0.110832	504.3
14	9064	7.92	47.1	13.9	29.4	17.5	59.5	2.99	76	9.1	14.8	348	2.5	22.6	18.8	1.1	1.5	87	67.4	34.8	65.2	0.533742	84	32	144	5.6	98	97.2	30.8	0.36	6.6	522	10.3356	1087.5	68	1.3464	92	1.8216	71	1.4058	214	4.2372	770	15.246	19.8	7	0.194861	0.0881144	407.8
14	9155	7.77	46	13.6	29.6	17.5	59.2	5.92	79.3	7.8	13	574				1.4	2.5	91	73.4	35.9	64.1	0.560062	132	50	144	5.2	96	104.4	34.6	0.32	6.8	646	8.398	857.639	81	1.053	109	1.417	90	1.17	227	2.951	922	11.986	13	7	0.161016	0.134967	433.9
14	9159	7.8	46.7	14.5	31.2	18.6	59.8	4.43	69.2	9.5	21.4	536	2.58	21.1	20	1.08	1.72	79	68	37.6	62.4	0.602564	92	76	144	5.6	98	102	36	0.36	7.2	386	9.5728	923.302	47	1.1656	72	1.7856	51	1.2648	241	5.9768	756	18.7488	24.8	7	0.216656	0.118763	402.8
14	9283	7.61	42.4	13.2	31	17.3	55.8	2.7	70.7	10.7	18.6	572	2.53	18.6	20.2	1	1.06	66	67.2	32	68	0.470588	74	30	144	5.2	98	97.2	29.4	0.3	7	536	6.5928	654.048	48	0.5904	75	0.9225	52	0.6396	156	1.9188	559	6.8757	12.3	7	0.314215	0.099685	385.1
14	9294	7.91	46.9	14.1	30.1	17.9	59.3	6.06	76.1	8.3	15.6	628	3.29	23.1	19.4	1.04	1.7	81	71.8	35.4	64.6	0.547988	70	44	144	5.4	100	97	25.6	0.3	7.4	475	7.6	713.213	95	1.52	95	1.52	107	1.712	192	3.072	293	4.688	16	7	0.211953	0.103827	455.4
14	9328												3.23	25.9	20	1.18	2.6	61	70	35.5	64.5	0.550388	86	32	144	5.4	98	101.2	30.4	0.28	7	502	8.785	871.528	66	1.155	82	1.435	74	1.295	163	2.8525	744	13.02	17.5	7	0.143514	0.209903	473.5
14	9522	7.21	43	13.1	30.4	18.1	59.7	3.91	77.8	7.6	14.6	531	1.73	20.2	18.7	1.28	2.84	56	72.8	38.4	61.6	0.623377	76	38	146	4.6	98	98.8	21.2	0.26	6.6	808	5.3328	561.111	43	0.2838	72	0.4752	58	0.3828	94	0.6204	706	4.6596	6.6	10	0.124185	0.133014	305.5
15	8772	8.1	47.5	14.1	29.7	17.4	58.6	4.53	82.1	5.6	12.3	558	1.97	20.2	19.2	0.96	1.6	86	69	34.3	65.7	0.52207	70	34	146	5	96	102.8	37.8	0.32	7	893	5.0901	505.673	62	0.3534	94	0.5358	67	0.3819	288	1.6416	616	3.5112	5.7	7	0.444106	0.223018	325
15	8790	7.71	44.4	13.6	30.6	17.6	57.6	4	75.4	8.8	15.8	652	2.89	16.8	19.5	1.22	1.28	76	72.2	35.8	64.2	0.557632	74	40	146	4.6	98	104.2	25.8	0.4	7	760	8.208	815.418	61	0.6588	83	0.8964	66	0.7128	90	0.972	606	6.5448	10.8	7	0.209613	0.114742	378.3
15	9102	7.53	45.6	13.7	30	18.2	60.6	5	74.9	9.5	15.6	570				1.18	2	146	63.8	32.2	67.8	0.474926	62	38	136	4.6	94	93.2	18.2	0.32	7.2	752	6.6176	637.829	72	0.6336	107	0.9416	90	0.792	240	2.112	514	4.5232	8.8	9	0.134117	0.127869	355.7
15	9145	7.76	42.7	12.8	30.1	16.6	55	3.57	67.1	11.4	21.4	758	2.83	21.6	19.7	1.12	2.08	109	66.2	35.8	64.2	0.557632	78	38	136	4.8	92	98	29	0.3	6	510	9.129	1056.6	87	1.5573	105	1.8795	94	1.6826	194	3.4726	709	12.6911	17.9	7	0.208453	0.117026	424.1
15	9193	7.34	43.1	13	30.2	17.8	58.7	4.5	64.6	12.4	23	506	2.83	21.7	17.1	1.62	3.96	106	66	33.4	66.6	0.501502	66	32	124	4	82	93.8	28	0.28	6.6	423	8.037	845.057	49	0.931	70	1.33	57	1.083	175	3.325	519	9.861	19	7	0.16608	0.133014	376.5
15	9255	6.93	40.5	12.2	30	17.5	58.5	4.08	76.8	6.9	16.3	676	2	25.2	17.8	1.46	2	86	78	32	68	0.470588	74	34	144	5	98	101.2	26.8	0.28	6.8	891	5.5242	563.763	78	0.4836	98	0.6076	71	0.4402	300	1.86	1092	6.7704	6.2	7	0.174323	0.098679	346.3
15	9312	8.18	48.9	14.1	28.8	17.2	59.7	3.63	70.2	9.4	20.4	549	2.76					92														884	10.6964		87	1.0527	117	1.4157	90	1.089	129	1.5609	823	9.9583	12.1	7	0.277402	0.116453	521.5
15	9342	8.04	46.9	14.1	30.1	17.5	58.3	1.21	47.3	7.1	45.7	522				0.94	2.04	73	67	35.7	64.3	0.55521	80	38	146	5.2	98	102.8	31	0.36	6.8	620	8.37	855.968	86	1.161	127	1.7145	112	1.512	198	2.673	898	12.123	13.5	7	0.274605	0.120579	414
15	9345	7.48	42.8	13.5	31.5	18	57.3	4.05	78.5	7.4	14.1	507	2.01	29.1	19.4	1.08	2.02	79	71	35.7	64.3	0.55521	94	36	144	5.4	96	101.4	35.6	0.32	6.6	528	8.6592	911.111	54	0.8856	67	1.0988	55	0.902	179	2.9356	589	9.6596	16.4	7	0.290261	0.133014	449.9
15	9346	7.68	46.1	13.8	30	18	60.1	5.61	73.2	8.1	18.6	560				1.64	3.16	68	82	36.7	63.3	0.579779	102	52	146	4.6	96	107.8	27.8	0.28	6.8	800	6.96	711.773	85	0.7395	113	0.9831	90	0.783	270	2.349	567	4.9329	8.7	7	0.231169	0.133662	380.1
16	19121	8.67	48.8	14	28.6	16.1	56.3	4.35	74.9	7.8	17.2	252	3.06	21.6	20.4	0.96	1.36	91	57	37.6	62.4	0.602564	78	38	126	5	88	86.8	27	0.38	6.4	652	8.8672	962.153	78	1.0608	112	1.5232	99	1.3464	186	2.5296	191	2.5976	13.6	10	0.256785	0.177383	457.9
16	8767	4.44	31.2	8.9	28.6	20.1	70.3	5.57	89.9	3	7.1	904	1.59	15.5	19.1	1.28	1.66	122	69.6	35.8	64.2	0.557632	94	36	142	3.6	94	99	41.2	0.24	6.6	656	4.6576	489.727	33	0.2343	78	0.5538	77	0.5467	234	1.6614	789	5.6019	7.1	7	0.130462	0.10126	355.7
16	8827	7.17	44.3	12.9	29.1	18	61.8	3.39	78.4	8	13.7	647	2.02	20.8	18.7	1.26	1.86	58	69.2	28.3	71.7	0.3947	64	40	138	4.8	94	97.8	23	0.34	7.2	436	8.3712	807.407	52	0.9984	59	1.1328	46	0.8832	231	4.4352	589	11.3088	19.2	7	0.0907037	0.172263	365.5
16	8829	7.13	42.3	12.9	30.6	18.1	59.3	6.42	70.7	10.8	18.5	445	1.95	21	19	1.32	1.5	83	71.4	35.2	64.8	0.54321	72	34	136	4.4	92	92.4	25.4	0.32	6.8																0.162018	0.0771466	312.5
16	9057	7.15	44.7	13.2	29.5	18.4	62.5	3.73	76.6	7.4	16	838	3.44	20.2	17.6			66														571	8.2795		44	0.638	80	1.16	54	0.783	233	3.3785	766	11.107	14.5	7	0.264848	0.10969	445.3
16	9146	6.58	46.4	13.4	28.9	20.4	70.6	4.33	78.3	6.6	15.1	337	1.46	21.7	19.7	1.26	2.18	86	73	37.7	62.3	0.605136	72	36	146	4.8	94	102.8	29.2	0.3	6.6	430	6.966	732.446	54	0.8748	66	1.0692	56	0.9072	248	4.0176	729	11.8098	16.2	7	0.187067	0.0231254	324.4
16	9149	7.92	44.5	13	29.2	16.4	56.2	5.58	76.9	8.3	14.8	791	2.31	21.7	17.8	1.06	1.48	96	70	39.5	60.5	0.652893	70	34	132	4.6	88	94.4	26.8	0.28	6.6	510	7.497	788.826	41	0.6027	55	0.8085	36	0.5292	280	4.116	735	10.8045	14.7	7	0.15903	0.249629	391.7
16	9195	6.88	42	12.8	30.5	18.6	61	4.62	74.9	9	16.1	717						70														739	10.1982		37	0.5106	117	1.6146	42	0.5796	133	1.8354	626	8.6388	13.8	7	0.193661	0.124788	448.1
16	9261	7.19	42.9	12.9	30.1	17.9	59.6	4.11	80.1	5.6	14.2	530	0.98	32.7		1.28	1.16	74	72.6	36.2	63.8	0.567398	80	36	142	4.6	96	98.8	27.4	0.3	6.6	360	7.704	810.606	31	0.6634	45	0.963	43	0.9202	83	1.7762	151	3.2314	21.4	10	0.179557	0.0742205	349.4
17	8830	7.62	45.5	13.7	30.1	18	59.8	4.6	75.2	8.9	15.8	651	2.88	21.8	20.8	1.18	0.72	102	57.8	33.9	66.1	0.512859	62	30	122	4.4	86	84.2	32.2	0.26	5.8	537	6.7662	810.129	97	1.2222	107	1.3482	112	1.4112	202	2.5452	369	4.6494	12.6	7	0.266326	0.138285	443.5
17	9060	8.22	48.9	15.2	31.1	18.5	59.5	5.18	77.5	6.7	15.8	548				1.18	1.8	70	67.8	33.7	66.3	0.508296	112	52	140	5.2	96	97.2	31.2	0.3	6.6	568	6.6456	699.728	91	1.0647	125	1.4625	119	1.3923	193	2.2581	699	8.1783	11.7	7	0.22871	0.0933026	396.8
17	9153	8.61	51.5	15.4	30	17.9	59.8	7.11	76.3	6.5	17.1	260	3.15	19.2	18.4	1.18	2.92	111	68.4	35.2	64.8	0.54321	98	38	136	5.2	94	95	33.6	0.3	6.6	570	11.172	1175.51	101	1.9796	112	2.1952	110	2.156	165	3.234	600	11.76	19.6	7	0.242469	0.129755	485.3
17	9281	7.3	43.1	12.6	29.3	17.3	59	3.2	76.1	9.7	14.1	719	1.74	22.3	19.6	1.32	2.76	55	76.4	38.4	61.6	0.623377	74	36	138	4.2	92	99.2	23.8	0.26	7	348	4.9068	486.448	95	1.3395	105	1.4805	110	1.551	196	2.7636	571	8.0511	14.1	7	0.381503	0.090422	326.7
17	9286	7.58	44.1	13.3	30.2	17.6	58.2	4.27	79.4	7.4	13.2	649	2.66	19.7	19.6	1.14	1.04	65	69.6	36.4	63.6	0.572327	96	44	142	5	100	99.2	33.4	0.32	7.2	675	8.64	833.333	102	1.3056	123	1.5744	117	1.4976	224	2.8672	602	7.7056	12.8	7	0.322038	0.0871963	441.8
17	9301												1.97	23	18.1	1.18	1.56	64	70.4	35.6	64.4	0.552795	70	24	130	4.6	90	90	21.8	0.2	6.4	392	5.488	595.073	67	0.938	84	1.176	76	1.064	159	2.226	477	6.678	14	7	0.360185	0.0652125	347.6
17	9314	7.56	46.5	13.3	28.6	17.6	61.5	2.61	71.3	8.9	19.8	543	2.08	19.7	18.6	1.1	1.38	67	68.4	37.8	62.2	0.607717	60	28	136	4.6	94	91.4	17	0.28	7	773	8.3484	827.64	94	1.0152	118	1.2744	118	1.2744	519	5.6052	784	8.4672	10.8	7	0.278802	0.0809549	355.6
17	9341	3.88	23.8	7.1	29.7	18.2	61.2	7.44	78.8	7.9	13.3	1012	2.09	16.3	18.5			106																													0.164041	0.0629618	348.3
18	8788	7.7	45.4	13.3	29.2	17.2	59	4.34	73.4	8.6	18	436	1.54	26	18.4	1.12	1.38	97	63.2	38.5	61.5	0.626016	66	30	124	4	86	86.4	28	0.26	5.6	363	5.9169	733.743	79	1.2877	87	1.4181	90	1.467	264	4.3032	552	8.9976	16.3	7	0.267688	0.0822619	347.8
18	8826	7.71	43.1	13.6	31.5	17.6	55.9	3.92	75.4	8.8	15.8	700	2.99	19.5	19.6	1	1.1	76	60.4	35.8	64.2	0.557632	60	32	128	4.2	88	85.2	23.6	0.26	6	581	7.4368	860.741	84	1.0752	103	1.3184	97	1.2416	185	2.368	588	7.5264	12.8	7	0.30961	0.134313	432.4
18	8868	7.37	44	12.8	29.2	17.4	59.8	3.66	77.6	7.8	14.6	644	2.15	21.2	19.1			108														488	6.9296		83	1.1786	98	1.3916	103	1.4626			377	5.3534	14.2	7	0.250225	0.0881144	384
18	9150	7.62	46.2	13.7	29.7	18	60.7	4.28	64.9	9.8	25.3	561	2.29	19.9	17.8	1.22	2.82	84	70.8	37.2	62.8	0.592357	78	32	136	4.8	92	91.4	15.2	0.26	7	562	5.5638	551.964	62	0.6138	73	0.7227	72	0.7128	273	2.7027	504	4.9896	9.9	7	0.320461	0.109148	394.7
18	9151	7.78	45.8	13.7	29.9	17.6	58.8	3.37	65.4	12.6	22	602	3.01	19.6	19.7	1.04	1.6	68	64.2	38.4	61.6	0.623377	82	44	132	4.8	92	94.4	29.8	0.3	6.2	545	6.54	732.527	84	1.008	103	1.236	95	1.14	297	3.564	326	3.912	12	8	0.402031	0.0423423	402.8
18	9274	7.33	42.1	12.1	28.7	16.5	57.4	2.69	76.6	8.4	15	706	2.2	22	18.7	1.22	2.18	78	70.4	34.6	65.4	0.529052	70	30	130	4.2	90	93.6	17	0.28	6.4	457	7.3577	798.362	50	0.805	74	1.1914	64	1.0304	240	3.864	329	5.2969	16.1	8	0.273207	0.0682601	381.7
18	9325	6.75	43.2	12.2	28.3	18.1	64	4.42	74.1	9.7	16.2	871	3.37	20.4	18.5																	302	10.2076		44	1.4872	55	1.859	49	1.6562	108	3.6504	414	13.9932	33.8	7	0.312673	0.103309	482.1
18	9338	7.93	46.2	14.1	30.6	17.8	58.3	5.75	75.7	9	15.3	415	3.35	22.7	19.8	1.14	1.02	68	71.4	36.1	63.9	0.564945	78	44	138	4.8	96	97.6	28.4	0.28	6.8	532	10.5868	1080.42	104	2.0696	121	2.4079	121	2.4079	237	4.7163	850	16.915	19.9	7	0.379686	0.124788	489.9
18	9512	7.06	44.1	13.1	29.8	18.6	62.5	4.13	68.1	9.8	22.2	577	2.44	23.7	17.9	1.4	5.34	71	73	34.5	65.5	0.526718	64	36	140	5	98	97.4	22.6	0.3	7	599	5.99	593.834	98	0.98	131	1.31	124	1.24	291	2.91	912	9.12	10	7	0.219027	0.0805237	410.5
19	8762	7.48	45.3	12.8	28.4	17.2	60.5	6.41	73.7	9.2	17.1	717	2.6	19.6	18.1	1.62	1.48	65	78.2	33.6	66.4	0.506024	94	40	142	5.2	98	103.4	27.2	0.36	6.6	841	7.4008	778.704	79	0.6952	94	0.8272	73	0.6424	268	2.3584	1075	9.46	8.8	7	0.059315		327.6
19	8824	7.3	43.9	13.3	30.3	18.2	60.2	4.14	76	8	16	671	1.9	23.7	17.8	1.3	1.66	119	75	36	64	0.5625	102	50	144	4.8	98	102	21.4	0.3	7	615	7.4415	738.24	102	1.2342	126	1.5246	126	1.5246	352	4.2592	422	5.1062	12.1	7	0.0337915		326.3
19	8825	7.92	48.2	13.7	28.5	17.3	60.9	1.81	55.2	9.9	34.9	745	2.07	22.4	18.4	1.2	1.72	53	75.8	34.4	65.6	0.52439	82	38	144	5	98	100.6	32	0.28	6.6	678	4.1358	435.164	90	0.549	95	0.5795	85	0.5185	180	1.098	908	5.5388	6.1	7	0.0198461		319.6
19	8832	8.1	48.7	14	28.8	17.3	60.1	4.32	73	9.6	17.4	798	3.1	20.6	19	1.4	1.9	63	73.4	35.7	64.3	0.55521	96	38	146	5.2	100	102.8	25	0.36	7.2	807	8.6349	832.841	81	0.8667	122	1.3054	91	0.9737	221	2.3647	1327	14.1989	10.7	7	0.0523611	0.0296849	420.8
19	9103	7.85	46.4	13.4	28.9	17.1	59.1	6.46	72.6	9.2	18.2	364	2.82	21.4	20.2	1.24	1.1	77	71.8	35.7	64.3	0.55521	68	34	142	4.8	98	101.2	35.8	0.34	6.6	736	5.2992	557.576	93	0.6696	137	0.9864	119	0.8568	218	1.5696	707	5.0904	7.2	9	0.0325223	0.0278763	436
19	9156	7.07	41.7	12.6	30.2	17.9	59.1	2.73	73.9	8.3	17.7	727	3.37	24	19.6	1.18	1.5	97	63.2	33.7	66.3	0.508296	60	32	136	4.6	96	93	38.6	0.26	5.8	451	7.0807	847.785	62	0.9734	77	1.2089	58	0.9106	194	3.0458	670	10.519	15.7	7	0.0344298		379.5
19	9251	8.02	46.2	13.4	29.1	16.8	57.5	3.92	69	11.3	19.7	707	2.76	22.6	19.3			78														676	8.5176		80	1.008	121	1.5246	91	1.1466	312	3.9312	957	12.0582	12.6	7	0.044209	0.0331726	465.9
19	9284	8.01	46.4	13.5	29.1	16.8	57.9	5.04	70.5	11.4	18.1	482	2.88	25.5	19.2	1.02	1.38	72	69.6	33.8	66.2	0.510574	144	48	144	5.6	100	104.2	34.4	0.3	7.2	669	8.8308	851.736	56	0.7392	65	0.858	51	0.6732	242	3.1944	512	6.7584	13.2	7	0.0667875	0.0382124	420.5
19	9515	7.54	46.3	13.6	29.3	18	61.4	2.86	66.4	9.5	24.1	494	2.72	19.3	19.3	1.02	1.42	81	68.4	35.9	64.1	0.560062	128	46	144	5.4	100	100.4	38.8	0.3	6.8	527	8.1685	834.781	60	0.93	70	1.085	65	1.0075	224	3.472	597	9.2535	15.5	7	0.0435416	0.0393675	417.3
20	8768	7.72	45.4	13.5	29.8	17.5	58.8	6.38	65.3	12.4	22.2	851	4.01	21	17.9			63														1009	8.2738		44	0.3608	130	1.066	48	0.3936	468	3.8376	1827	14.9814	8.2	7	0.180623	0.176519	337.6
20	8769	7.85	47.2	14	29.7	17.8	60.1	3.83	74.4	7.6	18	580	3.15	22.7	21.2	1.02	0.82	58	61.8	34.8	65.2	0.533742	124	50	124	4.4	88	81	36.2	0.36	6	1180	5.546	641.898	142	0.6674	209	0.9823	167	0.7849	282	1.3254	1582	7.4354	4.7	7	0.255459	0.265858	369.8
20	8770	6.65	39	11.4	29.2	17.1	58.6	9.3	60.9	14.1	25	1109	6.44	20.4	20.8	0.96	1.64	63	62.8	23.7	76.3	0.310616	90	30	142	4.4	98	99	37.6	0.42	6.2																0.147314	0.0962079	388.7
20	8823	7.82	42.4	12.2	28.8	15.6	54.2	2.6	62.8	13.4	23.8	743	1.84	19.1	19	1.24	1.16	66	72.4	35.9	64.1	0.560062	70	42	144	4.4	102	98.8	32.6	0.34	6.4	823	4.6911	509.017	136	0.7752	164	0.9348	143	0.8151	370	2.109	1404	8.0028	5.7	7	0.14828	0.090422	283.2
20	9158	7.88	45.6	13.1	28.7	16.6	57.9	4.48	66.3	11.6	22.1	668	2.17	21.2	18.8	1.22	0.78	84	69.8	37.6	62.4	0.602564	90	42	136	4.2	94	93.6	20.6	0.34	6.6	855	5.301	557.765	77	0.4774	112	0.6944	94	0.5828	294	1.8228	753	4.6686	6.2	7	0.113725	0.164018	307.3
20	9194	7.47	46.6	14.3	30.6	19.1	62.4	4.38	71.2	10.3	18.6	693	1.97	20.1	17.9	1.02	1.06	71	70.8	37.4	62.6	0.597444	82	36	138	4.8	94	93.4	23.4	0.44	6.8	1034	6.204	633.58	51	0.306	98	0.588	75	0.45	143	0.858	913	5.478	6	10	0.193661	0.21415	316.8
20	9202	7.49	46	13.8	30	18.4	61.4	3.61	64.6	10	25.4	469	2.44	21.8	18.1	1.28	1.46	66	70.6	36	64	0.5625	78	34	146	4.6	98	91.2	29.8	0.28	6.2	578	4.6818	524.4	88	0.7128	99	0.8019	112	0.9072	236	1.9116	395	3.1995	8.1	9	0.171185	0.233429	336.1
20	9311	8.04	49.3	14.6	29.6	18.2	61.4	6.26	65	11.1	23.9	546	1.61	20.9	19.2			103														814	4.9654		88	0.5368	96	0.5856	94	0.5734	120	0.732	732	4.4652	6.1	10	0.110339	0.199747	301.5
20	9177	7.34	45.2	13.6	30.2	18.6	61.6	3.72	68.8	10.8	20.5	769						75														611	6.2322		98	0.9996	102	1.0404	107	1.0914	295	3.009	972	9.9144	10.2	7	0.211953	0.124788	302.5
