# Supplementary material for: Republished study: long-term toxicity of a Roundup herbicide and a Roundup-tolerantgenetically modified maize
Source: Springer Nature journal article supplement (doi:10.1186/s12302-014-0014-5), 2014-06-23
Supplement: 12302_2014_14_MOESM2_ESM.pdf [file 12302_2014_14_MOESM2_ESM.pdf]

**List of blood and urine parameters with sampling and unit details**

| <b>ABREVIATION</b>           | <b>SIGNIFICATION</b>                           | <b>SAMPLE</b>      | <b>UNIT</b>                      |       |
|------------------------------|------------------------------------------------|--------------------|----------------------------------|-------|
| <b>CYP1A1, 1A2, 2C9, 3A4</b> | Cytochrome P450 isoforms 1A1, 1A2, 2C9 and 3A4 | Liver S9 fraction  | RLU (Relative Luminescence Unit) |       |
| <b>GGT.S9</b>                | Gamma-GT S9                                    |                    | U/mg protein                     |       |
| <b>GST.S9</b>                | Gluthation-S-Transferase S9                    |                    | µmol/min/mg protein              |       |
| <b>A/G</b>                   | Albumin/Globulin                               | Heparinized plasma | No unit                          |       |
| <b>Album</b>                 | Albumin                                        |                    | %                                |       |
| <b>ALT</b>                   | ALanine AminoTransferase                       |                    | IU/l                             |       |
| <b>AST</b>                   | ASpartate AminoTransferase                     |                    | sec                              |       |
| <b>Ca</b>                    | Calcium (conc.)                                |                    | mg/l                             |       |
| <b>Cholest</b>               | Cholesterol                                    |                    | g/l                              |       |
| <b>Cl</b>                    | Chloride (conc.)                               |                    | meq/l                            |       |
| <b>Creat</b>                 | Creatinine (conc.)                             |                    | mg/l                             |       |
| <b>Glob</b>                  | Globulin                                       |                    | %                                |       |
| <b>K</b>                     | Potassium (conc.)                              |                    | meq/l                            |       |
| <b>Na</b>                    | Sodium (conc.)                                 |                    | meq/l                            |       |
| <b>P</b>                     | Phosphore (conc.)                              |                    | mg/l                             |       |
| <b>Prot</b>                  | Protein                                        |                    | g/l                              |       |
| <b>Trigly</b>                | Triglycerides                                  |                    | g/l                              |       |
| <b>Urea</b>                  | Urea (conc.)                                   |                    | g/l                              |       |
| <b>APTT</b>                  | Activated Partial Thromboplastin Time          |                    | Platelet-poor plasma (PPP)       | sec   |
| <b>Fibrin</b>                | Fibrinogen                                     |                    |                                  | g/l   |
| <b>PT</b>                    | Prothrombin Time                               | sec                |                                  |       |
| <b>Glycem</b>                | Glycemia                                       | Whole blood        | mg/dl                            |       |
| <b>Hct</b>                   | Hematocrit                                     | Whole EDTA-Blood   | %                                |       |
| <b>Hgb</b>                   | Hemoglobin                                     |                    | g/dl                             |       |
| <b>Lymph</b>                 | Lymphocytes                                    |                    | %                                |       |
| <b>MCH</b>                   | Mean corpuscular hemoglobin                    |                    | pg                               |       |
| <b>MCHC</b>                  | Mean corpuscular hemoglobin concentration      |                    | g/dl                             |       |
| <b>MCV</b>                   | Mean corpuscular volume                        |                    | fl                               |       |
| <b>Mono</b>                  | Monocytes                                      |                    | %                                |       |
| <b>Neutro</b>                | Neutrophiles                                   |                    | %                                |       |
| <b>Plt</b>                   | Platelet                                       |                    | 10 <sup>3</sup> /µl              |       |
| <b>RBC</b>                   | Red Blood Cells                                |                    | 10 <sup>6</sup> /µl              |       |
| <b>WBC</b>                   | White blood cells                              |                    | 10 <sup>3</sup> /µl              |       |
| <b>GGT</b>                   | Gamma-glutamylTransferase                      |                    | Serum                            | U/l   |
| <b>CRP</b>                   | C-reactive protein                             |                    |                                  | µg/ml |
| <b>Oestra</b>                | Oestradiol                                     | ng/ml              |                                  |       |
| <b>Testo</b>                 | Testosterone                                   | ng/ml              |                                  |       |
| <b>UCa</b>                   | Urinary Calcium (Conc.)                        | Urine              | mg/l                             |       |
| <b>UCaex</b>                 | Urinary Calcium excreted/24h                   |                    | mg/24h                           |       |
| <b>UCI</b>                   | Urinary Chloride (Conc.)                       |                    | meq/l                            |       |
| <b>UClair</b>                | Urinary Clearance                              |                    | µl/min                           |       |
| <b>UCIex</b>                 | Urinary Chloride excreted/24h                  |                    | meq/24h                          |       |
| <b>UCreat</b>                | Urinary Creatinine (Conc.)                     |                    | mg/l                             |       |
| <b>UCreatex</b>              | Urinary Creatinine excreted/24h                |                    | mg/24h                           |       |
| <b>UK</b>                    | Urinary Potassium (Conc.)                      |                    | meq/l                            |       |

|              |                                |       |         |
|--------------|--------------------------------|-------|---------|
| <b>UKex</b>  | Urinary Potassium excreted/24h | Urine | meq/24h |
| <b>UNa</b>   | Urinary Sodium (Conc.)         |       | meq/l   |
| <b>UNaex</b> | Urinary Sodium excreted/24h    |       | meq/24h |
| <b>UP</b>    | Urinary Phosphore (Conc.)      |       | mg/l    |
| <b>UPex</b>  | Urinary Phosphore excreted/24h |       | mg/24h  |
| <b>UpH</b>   | Urinary pH                     |       | No unit |
| <b>UVol</b>  | Urinary Volume/24h             |       | ml      |
