# Supplementary material for: Republished study: long-term toxicity of a Roundup herbicide and a Roundup-tolerantgenetically modified maize
Source: Springer Nature journal article supplement (doi:10.1186/s12302-014-0014-5), 2014-06-23
Supplement: 12302_2014_14_MOESM3_ESM.xlsx [file 12302_2014_14_MOESM3_ESM.xlsx]

## Sheet: MORTALITY MALES
Experimental day	Number of dead rats per group
Males	Control isogenic	GMO 11% + R	GMO 22% + R	GMO 33% + R	GMO 11%	GMO 22%	GMO 33%	R (A)	R (B)	R (C)
0	0	0	0	0	0	0	0	0	0	0
1	0	0	0	0	0	0	0	0	0	0
2	0	0	0	0	0	0	0	0	0	0
3	0	0	0	0	0	0	0	0	0	0
4	0	0	0	0	0	0	0	0	0	0
5	0	0	0	0	0	0	0	0	0	0
6	0	0	0	0	0	0	0	0	0	0
7	0	0	0	0	0	0	0	0	0	0
8	0	0	0	0	0	0	0	0	0	0
9	0	0	0	0	0	0	0	0	0	0
10	0	0	0	0	0	0	0	0	0	0
11	0	0	0	0	0	0	0	0	0	0
12	0	0	0	0	0	0	0	0	0	0
13	0	0	0	0	0	0	0	0	0	0
14	0	0	0	0	0	0	0	0	0	0
15	0	0	0	0	0	0	0	0	0	0
16	0	0	0	0	0	0	0	0	0	0
17	0	0	0	0	0	0	0	0	0	0
18	0	0	0	0	0	0	0	0	0	0
19	0	0	0	0	0	0	0	0	0	0
20	0	0	0	0	0	0	0	0	0	0
21	0	0	0	0	0	0	0	0	0	0
22	0	0	0	0	0	0	0	0	0	0
23	0	0	0	0	0	0	0	0	0	0
24	0	0	0	0	0	0	0	0	0	0
25	0	0	0	0	0	0	0	0	0	0
26	0	0	0	0	0	0	0	0	0	0
27	0	0	0	0	0	0	0	0	0	0
28	0	0	0	0	0	0	0	0	0	0
29	0	0	0	0	0	0	0	0	0	0
30	0	0	0	0	0	0	0	0	0	0
31	0	0	0	0	0	0	0	0	0	0
32	0	0	0	0	0	0	0	0	0	0
33	0	0	0	0	0	0	0	0	0	0
34	0	0	0	0	0	0	0	0	0	0
35	0	0	0	0	0	0	0	0	0	0
36	0	0	0	0	0	0	0	0	0	0
37	0	0	0	0	0	0	0	0	0	0
38	0	0	0	0	0	0	0	0	0	0
39	0	0	0	0	0	0	0	0	0	0
40	0	0	0	0	0	0	0	0	0	0
41	0	0	0	0	0	0	0	0	0	0
42	0	0	0	0	0	0	0	0	0	0
43	0	0	0	0	0	0	0	0	0	0
44	0	0	0	0	0	0	0	0	0	0
45	0	0	0	0	0	0	0	0	0	0
46	0	0	0	0	0	0	0	0	0	0
47	0	0	0	0	0	0	0	0	0	0
48	0	0	0	0	0	0	0	0	0	0
49	0	0	0	0	0	0	0	0	0	0
50	0	0	0	0	0	0	0	0	0	0
51	0	0	0	0	0	0	0	0	0	0
52	0	0	0	0	0	0	0	0	0	0
53	0	0	0	0	0	0	0	0	0	0
54	0	0	0	0	0	0	0	0	0	0
55	0	0	0	0	0	0	0	0	0	0
56	0	0	0	0	0	0	0	0	0	0
57	0	0	0	0	0	0	0	0	0	0
58	0	0	0	0	0	0	0	0	0	0
59	0	0	0	0	0	0	0	0	0	0
60	0	0	0	0	0	0	0	0	0	0
61	0	0	0	0	0	0	0	0	0	0
62	0	0	0	0	0	0	0	0	0	0
63	0	0	0	0	0	0	0	0	0	0
64	0	0	0	0	0	0	0	0	0	0
65	0	0	0	0	0	0	0	0	0	0
66	0	0	0	0	0	0	0	0	0	0
67	0	0	0	0	0	0	0	0	0	0
68	0	0	0	0	0	0	0	0	0	0
69	0	0	0	0	0	0	0	0	0	0
70	0	0	0	0	0	0	0	0	0	0
71	0	0	0	0	0	0	0	0	0	0
72	0	0	0	0	0	0	0	0	0	0
73	0	0	0	0	0	0	0	0	0	0
74	0	0	0	0	0	0	0	0	0	0
75	0	0	0	0	0	0	0	0	0	0
76	0	0	0	0	0	0	0	0	0	0
77	0	0	0	0	0	0	0	0	0	0
78	0	0	0	0	0	0	0	0	0	0
79	0	0	0	0	0	0	0	0	0	0
80	0	0	0	0	0	0	0	0	0	0
81	0	0	0	0	0	0	0	0	0	0
82	0	0	0	0	0	0	0	0	0	0
83	0	0	0	0	0	0	0	0	0	0
84	0	0	0	0	0	0	0	0	0	0
85	0	0	0	0	0	0	0	0	0	0
86	0	0	0	0	0	0	0	0	0	0
87	0	0	0	0	0	0	0	0	0	0
88	0	0	0	0	0	0	0	0	0	0
89	0	0	0	0	0	0	0	0	0	0
90	0	0	0	0	0	0	0	0	0	0
91	0	0	0	0	0	0	0	0	0	0
92	0	0	0	0	0	0	0	0	0	0
93	0	0	0	0	0	0	0	0	0	0
94	0	0	0	0	0	0	0	0	0	0
95	0	0	0	0	0	0	0	0	0	0
96	0	0	0	0	0	0	0	0	0	0
97	0	0	0	0	0	0	0	0	0	0
98	0	0	0	0	0	0	0	0	0	0
99	0	0	0	0	0	0	0	0	0	0
100	0	0	0	0	0	0	0	0	0	0
101	0	0	0	0	0	0	0	0	0	0
102	0	0	0	0	0	0	0	0	0	0
103	0	0	0	0	0	0	0	0	0	0
104	0	0	0	0	0	0	0	0	0	0
105	0	0	0	0	0	0	0	0	0	0
106	0	0	0	0	0	0	0	0	0	0
107	0	0	0	0	0	0	0	0	0	0
108	0	0	0	0	0	0	0	0	0	0
109	0	0	0	0	1	0	0	0	0	0
110	0	0	0	0	1	0	0	0	0	0
111	0	0	0	0	1	0	0	0	0	0
112	0	0	0	0	1	0	0	0	0	0
113	0	0	0	0	1	0	0	0	0	0
114	0	0	0	0	1	0	0	0	0	0
115	0	0	0	0	1	0	0	0	0	0
116	0	0	0	0	1	0	0	0	0	0
117	0	0	0	0	1	0	0	0	0	0
118	0	0	0	0	1	0	0	0	0	0
119	0	0	0	0	1	0	0	0	0	0
120	0	0	0	0	1	0	0	0	0	0
121	0	0	0	0	1	0	0	0	0	0
122	0	0	0	0	1	0	0	0	0	0
123	0	0	1	0	1	0	0	0	0	0
124	0	0	1	0	1	0	0	0	0	0
125	0	0	1	0	1	0	0	0	0	0
126	0	0	1	0	1	0	0	0	0	0
127	0	0	1	0	1	0	0	0	0	0
128	0	0	1	0	1	0	0	0	0	0
129	0	0	1	0	1	0	0	0	0	0
130	0	0	1	0	1	0	0	0	0	0
131	0	0	1	0	1	0	0	0	0	0
132	0	0	1	0	1	0	0	0	0	0
133	0	0	1	0	1	0	0	0	0	0
134	0	0	1	0	1	0	0	0	0	0
135	0	0	1	0	1	0	0	0	0	0
136	0	0	1	0	1	0	0	0	0	0
137	0	0	1	0	1	0	0	0	0	0
138	0	0	1	0	1	0	0	0	0	0
139	0	0	1	0	1	0	0	0	0	0
140	0	0	1	0	1	0	0	0	0	0
141	0	0	1	0	1	0	0	0	0	0
142	0	0	1	0	1	0	0	0	0	0
143	0	0	1	0	1	0	0	0	0	0
144	0	0	1	0	1	0	0	0	0	0
145	0	0	1	0	1	0	0	0	0	0
146	0	0	1	0	1	0	0	0	0	0
147	0	0	1	0	1	0	0	0	0	0
148	0	0	1	0	1	0	0	0	0	0
149	0	0	1	0	1	0	0	0	0	0
150	0	0	1	0	1	0	0	0	0	0
151	0	0	1	0	1	0	0	0	0	0
152	0	0	1	0	1	0	0	0	0	0
153	0	0	1	0	1	0	0	0	0	0
154	0	0	1	0	1	0	0	0	0	0
155	0	0	1	0	1	0	0	0	0	0
156	0	0	1	0	1	0	0	0	0	0
157	0	0	1	0	1	0	0	0	0	0
158	0	0	1	0	1	0	0	0	0	0
159	0	0	1	0	1	0	0	0	0	0
160	0	0	1	0	1	0	0	0	0	0
161	0	0	1	0	1	0	0	0	0	0
162	0	0	1	0	1	0	0	0	0	0
163	0	0	1	0	1	0	0	0	0	0
164	0	0	1	0	1	0	0	0	0	0
165	0	0	1	0	1	0	0	0	0	0
166	0	0	1	0	1	0	0	0	0	0
167	0	0	1	0	1	0	0	0	0	0
168	0	0	1	0	1	0	0	0	0	0
169	0	0	1	0	1	0	0	0	0	0
170	0	0	1	0	1	0	0	0	0	0
171	0	0	1	0	1	0	0	0	0	0
172	0	0	1	0	1	0	0	0	0	0
173	0	0	1	0	1	0	0	0	0	0
174	0	0	1	0	1	0	0	0	0	0
175	0	0	1	0	1	0	0	0	0	0
176	0	0	1	0	1	0	0	0	0	0
177	0	0	1	0	1	0	0	0	0	0
178	0	0	1	0	1	0	0	0	0	0
179	0	0	1	0	1	0	0	0	0	0
180	0	0	1	0	1	0	0	0	0	0
181	0	0	1	0	1	0	0	0	0	0
182	0	0	1	0	1	0	0	0	0	0
183	0	0	1	0	1	0	0	0	0	0
184	0	0	1	0	1	0	0	0	0	0
185	0	0	1	0	1	0	0	0	0	0
186	0	0	1	0	1	0	0	0	0	0
187	0	0	1	0	1	0	0	0	0	0
188	0	0	1	0	1	0	0	0	0	0
189	0	0	1	0	1	0	0	0	0	0
190	0	0	1	0	1	0	0	0	0	0
191	0	0	1	0	1	0	0	0	0	0
192	0	0	1	0	1	0	0	0	0	0
193	0	0	1	0	1	0	0	0	0	0
194	0	0	1	0	1	0	0	0	0	0
195	0	0	1	0	1	0	0	0	0	0
196	0	0	1	0	1	0	0	0	0	0
197	0	0	1	0	1	0	0	0	0	0
198	0	0	1	0	1	0	0	0	0	0
199	0	0	1	0	1	0	0	0	0	0
200	0	0	1	0	1	0	0	0	0	0
201	0	0	1	0	1	0	0	0	0	0
202	0	0	1	0	1	0	0	0	0	0
203	0	0	1	0	1	0	0	0	0	0
204	0	0	1	0	1	0	0	0	0	0
205	0	0	1	0	1	0	0	0	0	0
206	0	0	1	0	1	0	0	0	0	0
207	0	0	1	0	1	0	0	0	0	0
208	0	0	1	0	1	0	0	0	0	0
209	0	0	1	0	1	0	0	0	0	0
210	0	0	1	0	1	0	0	0	0	0
211	0	0	1	0	1	0	0	0	0	0
212	0	0	1	0	1	0	0	0	0	0
213	0	0	1	0	1	0	0	0	0	0
214	0	0	1	0	1	0	0	0	0	0
215	0	0	1	0	1	0	0	0	0	0
216	0	0	1	0	1	0	0	0	0	0
217	0	0	1	0	1	0	0	0	0	0
218	0	0	1	0	1	0	0	0	0	0
219	0	0	1	0	1	0	0	0	0	0
220	0	0	1	0	1	0	0	0	0	0
221	0	0	1	0	1	0	0	0	0	0
222	0	0	1	0	1	0	0	0	0	0
223	0	0	1	0	1	0	0	0	0	0
224	0	0	1	0	1	0	0	0	0	0
225	0	0	1	0	1	0	0	0	0	0
226	0	0	1	0	1	0	0	0	0	0
227	0	0	1	0	1	0	0	0	0	0
228	0	0	1	0	1	0	0	0	0	0
229	0	0	1	0	1	0	0	0	0	0
230	0	0	1	0	1	0	0	0	0	0
231	0	0	1	0	1	0	0	0	0	0
232	0	0	1	0	1	0	0	0	0	0
233	0	0	1	0	1	0	0	0	0	0
234	0	0	1	0	1	0	0	0	0	0
235	0	0	1	0	1	0	0	0	0	0
236	0	0	1	0	1	0	0	0	0	0
237	0	0	1	0	1	0	0	0	0	0
238	0	0	1	0	1	0	0	0	0	0
239	0	0	1	0	1	0	0	0	0	0
240	0	0	1	0	1	0	0	0	0	0
241	0	0	1	0	1	0	0	0	0	0
242	0	0	1	0	1	0	0	0	0	0
243	0	0	1	0	1	0	0	0	0	0
244	0	0	1	0	1	0	0	0	0	0
245	0	0	1	0	1	0	0	0	0	0
246	0	0	1	0	1	0	0	0	0	0
247	0	0	1	0	1	0	0	0	0	0
248	0	0	1	0	1	0	0	0	0	0
249	0	0	1	0	1	0	0	0	0	0
250	0	0	1	0	1	0	0	0	0	0
251	0	0	1	0	1	0	0	0	0	0
252	0	0	1	0	1	0	0	0	0	0
253	0	0	1	0	1	0	0	0	0	0
254	0	0	1	0	1	0	0	0	0	0
255	0	0	1	0	1	0	0	0	0	0
256	0	0	1	0	1	0	0	0	0	0
257	0	0	1	0	1	0	0	0	0	0
258	0	0	1	0	1	0	0	0	0	0
259	0	0	1	0	1	0	0	0	0	0
260	0	0	1	0	1	0	0	0	0	0
261	0	0	1	0	1	0	0	0	0	0
262	0	0	1	0	1	0	0	0	0	0
263	0	0	1	0	1	0	0	0	0	0
264	0	0	1	0	1	0	0	0	0	0
265	0	0	1	0	1	0	0	0	0	0
266	0	0	1	0	1	0	0	0	0	0
267	0	0	1	0	1	0	0	0	0	0
268	0	0	1	0	1	0	0	0	0	0
269	0	0	1	0	1	0	0	0	0	0
270	0	0	1	0	1	0	0	0	0	0
271	0	0	1	0	1	0	0	0	0	0
272	0	0	1	0	1	0	0	0	0	0
273	0	0	1	0	1	0	0	0	0	0
274	0	0	1	0	1	0	0	0	0	0
275	0	0	1	0	1	0	0	0	0	0
276	0	0	1	0	1	0	0	0	0	0
277	0	0	1	0	1	0	0	0	0	0
278	0	0	1	0	1	0	0	0	0	0
279	0	0	1	0	1	0	0	0	0	0
280	0	0	1	0	1	0	0	0	0	0
281	0	0	1	0	1	0	0	0	0	0
282	0	0	1	0	1	0	0	0	0	0
283	0	0	1	0	1	0	0	0	0	0
284	0	0	1	0	1	0	0	0	0	0
285	0	0	1	0	1	0	0	0	0	0
286	0	0	1	0	1	0	0	0	0	0
287	0	0	1	0	1	0	0	0	0	0
288	0	0	1	0	1	0	0	0	0	0
289	0	0	1	0	1	0	0	0	0	0
290	0	0	1	0	1	0	0	0	0	0
291	0	0	1	0	1	0	0	0	0	0
292	0	0	1	0	1	0	0	0	0	0
293	0	0	1	0	1	0	0	0	0	0
294	0	0	1	0	1	0	0	0	0	0
295	0	1	1	0	1	0	0	0	0	0
296	0	1	1	0	1	0	0	0	0	0
297	0	1	1	0	1	0	0	0	0	0
298	0	1	1	0	1	0	0	0	0	0
299	0	1	1	0	1	0	0	0	0	0
300	0	1	1	0	1	0	0	0	0	0
301	0	1	1	0	1	0	0	0	0	0
302	0	1	1	0	1	0	0	0	0	0
303	0	1	1	0	1	0	0	0	0	0
304	0	1	1	0	1	0	0	0	0	0
305	0	1	1	0	1	0	0	0	0	0
306	0	1	1	0	1	0	0	0	0	0
307	0	1	1	0	1	0	0	0	0	0
308	0	1	1	0	1	0	0	0	0	0
309	0	1	1	0	1	0	0	0	0	0
310	0	1	1	0	1	0	0	0	0	0
311	0	1	1	0	1	0	0	0	0	0
312	0	1	1	0	1	0	0	0	0	0
313	0	1	1	0	1	0	0	0	0	0
314	0	1	1	0	1	0	0	0	0	0
315	0	1	1	0	1	0	0	0	0	0
316	0	1	1	0	1	0	0	0	0	0
317	0	1	1	0	1	0	0	0	0	0
318	0	1	1	0	1	0	0	0	0	0
319	0	1	1	0	1	0	0	0	0	0
320	0	1	1	0	1	0	0	0	0	0
321	0	1	1	0	1	0	0	0	0	0
322	0	1	1	0	1	0	0	0	0	0
323	0	1	1	0	1	0	0	0	0	0
324	0	1	1	0	1	0	0	0	0	0
325	0	1	1	0	1	0	0	0	0	0
326	0	1	1	0	1	0	0	0	0	0
327	0	1	1	0	1	0	0	0	0	0
328	0	1	1	0	1	0	0	0	0	0
329	0	1	1	0	1	0	0	0	0	0
330	0	1	1	0	1	0	0	0	0	0
331	0	1	1	0	1	0	0	0	0	0
332	0	1	1	0	1	0	0	0	0	0
333	0	1	1	0	1	0	0	0	0	0
334	0	1	1	0	1	0	0	0	0	0
335	0	1	1	0	1	0	0	0	0	0
336	0	1	1	0	1	0	0	0	0	0
337	0	1	1	0	1	0	0	0	0	0
338	0	1	1	0	1	0	0	0	0	0
339	0	1	1	0	1	0	0	0	0	0
340	0	1	1	0	1	0	0	0	0	0
341	0	1	1	0	1	0	0	0	0	0
342	0	1	1	0	1	0	0	0	0	0
343	0	1	1	0	1	0	0	0	0	0
344	0	1	2	0	1	0	0	0	0	0
345	0	1	2	0	1	0	0	0	0	0
346	0	1	3	0	1	0	0	0	0	0
347	0	1	3	0	1	0	0	0	0	0
348	0	1	3	0	1	0	0	0	0	0
349	0	1	3	0	1	0	0	0	0	0
350	0	1	3	0	1	0	0	0	0	0
351	0	1	3	0	1	0	0	0	0	0
352	0	1	3	0	1	0	0	0	0	0
353	0	1	3	0	1	0	0	0	0	0
354	0	1	3	0	1	0	0	0	0	0
355	0	1	3	0	1	0	0	0	0	0
356	0	1	3	0	1	0	0	0	0	0
357	0	1	3	0	1	0	0	0	0	0
358	0	1	3	0	1	0	0	0	0	0
359	0	1	3	0	1	0	0	0	0	0
360	0	1	3	0	1	0	0	0	0	0
361	0	1	3	0	1	0	0	0	0	0
362	0	1	3	0	1	0	0	0	0	0
363	0	1	3	0	1	0	0	0	0	0
364	0	1	3	0	1	0	0	0	0	0
365	0	1	3	0	1	0	0	0	0	0
366	0	1	3	0	1	0	0	0	0	0
367	0	1	3	0	1	0	0	0	0	0
368	0	1	3	0	1	0	0	0	0	0
369	0	1	3	0	1	0	0	0	0	0
370	0	1	3	0	1	0	0	0	0	0
371	0	1	3	0	1	0	0	0	0	0
372	0	1	3	0	1	0	0	0	0	0
373	0	1	3	0	1	0	0	0	0	0
374	0	1	3	0	1	0	0	0	0	0
375	0	1	3	0	1	0	0	0	0	0
376	0	1	3	0	1	0	0	0	0	0
377	0	1	3	0	1	0	0	0	0	0
378	0	1	3	0	1	0	0	0	0	0
379	0	1	3	0	1	0	0	0	0	0
380	0	1	3	0	1	0	0	0	0	0
381	0	1	3	0	1	0	0	0	0	0
382	0	1	3	0	1	0	0	0	0	0
383	0	1	3	0	1	0	0	0	0	0
384	0	1	3	0	1	0	0	0	0	0
385	0	1	3	0	1	0	0	0	0	0
386	0	1	3	0	1	0	0	0	0	0
387	0	1	3	0	1	0	0	0	0	0
388	0	1	3	0	1	0	0	0	0	0
389	0	1	3	0	1	0	0	0	0	0
390	0	1	3	0	1	0	0	0	0	0
391	0	1	3	0	1	0	0	0	0	0
392	0	1	3	0	1	0	0	0	0	0
393	0	1	3	0	1	0	0	0	0	0
394	0	1	3	0	1	0	0	0	0	0
395	0	1	3	0	1	0	0	0	0	0
396	0	1	3	0	1	0	0	0	0	0
397	0	1	3	0	1	0	0	0	0	0
398	0	1	3	0	1	0	0	0	0	0
399	0	1	3	0	1	0	0	0	0	0
400	0	1	3	0	1	0	0	0	0	0
401	0	1	3	0	1	0	0	0	0	0
402	0	1	3	0	1	0	0	0	0	0
403	0	1	3	0	1	0	0	0	0	0
404	0	1	3	0	1	0	0	0	0	0
405	0	1	3	0	1	0	0	0	0	0
406	0	1	3	0	1	0	0	0	0	0
407	0	1	3	0	1	0	0	0	0	0
408	0	1	3	0	1	0	0	0	0	0
409	0	1	3	0	1	0	0	0	0	0
410	0	1	3	0	1	0	0	0	0	0
411	0	1	3	0	1	0	0	0	0	0
412	0	1	3	0	1	0	0	0	0	0
413	0	1	3	0	1	0	0	0	0	0
414	0	1	3	0	1	0	0	0	0	0
415	0	1	3	0	1	0	0	0	0	0
416	0	1	3	0	1	0	0	0	0	0
417	0	1	3	0	1	0	0	0	0	0
418	0	1	3	0	1	0	0	0	0	0
419	0	1	3	0	1	0	0	0	0	0
420	0	1	3	0	1	0	0	0	0	0
421	0	1	3	0	1	0	0	0	0	0
422	0	1	3	0	1	0	0	0	0	0
423	0	1	3	0	1	0	0	0	0	0
424	0	1	3	0	1	0	0	0	0	0
425	0	1	3	0	1	0	0	0	0	0
426	0	1	3	0	1	0	0	0	0	0
427	0	1	3	0	1	0	0	0	0	0
428	0	1	3	0	2	0	0	0	0	0
429	0	1	3	0	2	0	0	0	0	0
430	0	1	3	0	2	0	0	0	0	0
431	0	1	3	0	2	0	0	0	0	0
432	0	1	3	0	2	0	0	0	0	0
433	0	1	3	0	2	0	0	0	0	0
434	0	1	3	1	2	0	0	0	0	0
435	0	1	3	1	2	0	0	0	0	0
436	0	1	3	1	2	0	0	0	0	0
437	0	1	3	1	2	0	0	0	0	0
438	0	1	3	1	3	0	0	0	0	0
439	0	1	3	1	3	0	0	0	0	0
440	0	1	3	1	3	0	0	0	0	0
441	0	1	3	1	3	0	0	0	0	0
442	0	1	3	1	3	0	0	0	0	0
443	0	1	3	1	3	0	0	0	0	0
444	0	1	3	1	3	0	0	0	0	0
445	0	2	3	1	3	0	0	0	0	0
446	0	2	3	1	3	0	0	0	0	0
447	0	2	3	1	3	0	0	0	0	0
448	0	2	3	1	3	0	0	0	0	0
449	0	2	3	1	3	0	0	0	0	0
450	0	2	3	1	3	0	0	0	0	0
451	0	2	3	1	3	0	0	0	0	0
452	0	2	3	1	3	0	0	0	0	0
453	0	2	3	1	3	0	0	0	0	0
454	0	2	3	1	3	0	0	0	0	0
455	0	2	3	1	3	0	0	0	0	0
456	0	2	3	1	3	0	0	0	0	0
457	0	2	3	1	3	0	0	0	0	0
458	0	2	3	1	3	0	0	0	0	0
459	0	2	3	1	3	0	0	0	0	0
460	0	2	3	1	3	0	0	0	0	0
461	0	2	3	1	3	0	0	0	0	0
462	0	2	3	1	3	0	0	0	0	0
463	0	2	3	1	3	0	0	0	0	0
464	0	2	3	1	3	0	0	0	0	0
465	0	2	3	1	3	0	0	0	0	0
466	0	2	3	1	3	0	0	0	0	0
467	0	2	3	1	3	0	0	0	0	0
468	0	2	3	1	3	0	0	0	0	0
469	0	2	3	1	3	0	0	0	0	0
470	0	2	3	1	3	0	0	0	0	0
471	0	2	3	1	3	0	0	0	0	0
472	0	2	3	1	3	0	0	0	0	0
473	0	2	3	1	3	0	0	0	0	0
474	0	2	3	1	3	0	0	0	0	0
475	0	2	3	1	3	0	0	0	0	0
476	0	3	3	1	3	0	0	0	0	0
477	0	3	3	1	3	0	0	0	0	0
478	0	3	3	1	3	0	0	0	0	0
479	0	3	3	1	3	0	0	0	0	0
480	0	3	3	1	3	0	0	0	0	0
481	0	3	3	1	3	0	0	0	0	0
482	0	3	3	1	3	0	0	0	0	0
483	0	3	3	1	3	0	0	0	0	0
484	0	3	3	1	3	0	0	0	0	0
485	0	3	3	1	3	0	0	0	0	0
486	0	3	3	1	3	0	0	0	0	0
487	0	3	3	1	3	0	0	0	0	0
488	0	3	3	1	3	0	0	0	0	0
489	0	3	3	1	3	0	0	0	0	0
490	0	3	3	1	3	0	0	0	0	0
491	0	3	3	1	3	0	0	0	0	0
492	0	3	3	1	3	0	0	0	0	0
493	1	4	3	1	3	0	0	0	0	0
494	1	4	3	1	3	0	0	0	0	0
495	1	4	3	1	3	0	0	0	0	0
496	1	4	3	1	3	0	0	0	0	0
497	1	4	3	1	3	0	0	0	0	0
498	1	4	3	1	3	0	0	0	0	0
499	1	4	3	1	3	0	0	0	0	0
500	1	4	3	1	3	0	0	0	0	0
501	1	4	3	1	4	0	0	0	1	0
502	1	4	3	1	4	0	0	0	1	0
503	1	4	3	1	4	0	0	0	1	0
504	1	4	3	1	4	0	0	0	1	0
505	1	4	3	1	5	0	0	0	1	0
506	1	4	3	1	5	0	0	0	1	0
507	1	4	3	1	5	0	0	0	1	0
508	1	4	3	1	5	0	0	0	1	0
509	1	4	3	1	5	0	0	0	1	0
510	1	4	3	1	5	0	0	0	1	0
511	1	4	3	1	5	0	0	0	1	0
512	1	4	3	1	5	0	0	0	1	0
513	1	4	3	1	5	0	0	0	1	0
514	1	4	3	1	5	0	0	0	1	0
515	1	4	3	1	5	0	0	0	1	0
516	1	4	3	1	5	0	0	0	1	0
517	1	4	3	1	5	0	0	0	1	0
518	1	4	3	1	5	0	0	0	1	0
519	1	4	3	1	5	0	0	0	1	0
520	1	4	3	1	5	0	0	0	1	0
521	1	4	3	1	5	0	0	0	1	0
522	1	4	3	1	5	0	0	0	1	0
523	1	4	3	1	5	0	0	0	1	0
524	1	4	3	1	5	0	0	0	1	0
525	1	4	3	1	5	0	0	0	1	0
526	1	4	3	1	5	0	0	0	1	0
527	1	4	3	1	5	0	0	0	1	0
528	1	4	3	1	5	0	0	0	1	0
529	1	4	3	1	5	0	0	0	1	0
530	1	4	3	1	5	0	0	0	1	0
531	1	4	3	1	5	0	0	0	1	0
532	1	4	3	1	5	0	0	0	1	0
533	1	4	3	1	5	0	0	0	1	0
534	1	4	3	1	5	0	0	0	1	0
535	1	4	3	1	5	0	0	0	1	0
536	1	4	3	1	5	0	0	0	2	0
537	1	4	3	1	5	0	0	0	2	0
538	1	4	3	1	5	0	0	0	2	0
539	1	4	3	1	5	0	0	0	2	0
540	1	4	3	1	5	0	0	0	3	0
541	1	4	3	1	5	0	0	0	3	0
542	1	4	3	1	5	0	0	0	3	0
543	1	4	4	1	5	0	0	1	3	0
544	1	4	4	1	5	0	0	1	3	0
545	1	4	4	1	5	0	0	1	3	0
546	1	4	4	1	5	0	0	1	3	0
547	1	4	4	1	5	0	1	1	3	0
548	1	4	4	1	5	0	1	1	3	0
549	1	4	4	1	5	0	1	1	3	0
550	1	4	4	1	5	0	1	1	3	0
551	1	4	4	1	5	0	1	1	3	0
552	1	4	4	1	5	0	1	1	3	0
553	1	4	4	1	5	0	1	1	3	0
554	1	4	4	1	5	0	1	1	3	0
555	1	4	4	1	5	0	1	1	3	0
556	1	4	4	1	5	0	1	1	3	0
557	1	4	4	1	5	0	1	1	3	0
558	1	4	4	1	5	0	1	1	3	0
559	1	4	4	1	5	0	1	1	3	0
560	1	4	4	1	5	0	1	1	3	0
561	1	4	4	1	5	0	1	1	3	0
562	1	4	4	1	5	0	1	1	3	0
563	1	4	4	1	5	0	1	1	3	0
564	1	4	4	1	5	0	1	1	3	0
565	1	4	4	1	5	0	1	1	3	0
566	1	4	4	1	5	0	1	1	3	0
567	1	4	4	1	5	0	1	1	3	0
568	1	4	4	1	5	0	1	1	3	0
569	1	4	4	1	5	0	1	1	3	0
570	1	4	4	1	5	0	1	1	3	0
571	1	4	4	1	5	0	1	1	3	0
572	1	4	4	1	5	0	1	1	3	0
573	1	4	4	1	5	0	1	1	3	0
574	2	4	4	1	5	0	1	1	3	0
575	2	4	4	1	5	0	1	1	3	0
576	2	4	4	1	5	0	1	1	3	0
577	2	4	4	1	5	0	1	1	3	0
578	2	4	4	1	5	0	1	1	4	0
579	2	4	4	1	5	0	1	1	4	0
580	2	4	4	1	5	0	1	1	4	0
581	2	4	4	1	5	0	1	1	4	1
582	2	4	4	1	5	0	1	1	4	1
583	2	4	4	1	5	0	1	1	4	1
584	2	4	5	1	5	0	1	1	4	1
585	2	4	5	1	5	0	1	1	4	1
586	2	4	5	1	5	0	1	1	4	1
587	2	4	5	1	5	0	1	1	4	1
588	3	4	5	2	5	0	1	1	4	1
589	3	4	5	2	5	0	1	1	4	1
590	3	4	5	2	5	0	1	1	4	1
591	3	4	5	2	5	0	1	1	4	1
592	3	4	5	2	5	0	1	2	4	1
593	3	4	5	2	5	0	1	2	4	1
594	3	4	5	2	5	0	1	2	4	1
595	3	4	5	3	5	1	1	3	4	1
596	3	4	5	3	5	1	1	3	4	1
597	3	4	5	3	5	1	1	3	4	1
598	3	4	5	3	5	1	1	3	4	1
599	3	4	5	3	5	1	1	3	4	1
600	3	4	5	3	5	1	1	3	4	1
601	3	4	5	3	5	1	1	3	4	1
602	3	4	5	3	5	2	2	3	4	1
603	3	4	5	3	5	2	2	3	4	1
604	4	4	5	3	5	2	2	3	4	1
605	4	4	5	3	5	2	2	3	4	1
606	4	4	5	3	5	2	2	4	4	1
607	4	4	5	3	5	2	2	4	4	1
608	4	4	5	3	5	2	2	4	4	1
609	4	4	5	3	6	2	2	4	4	1
610	5	4	5	3	6	3	2	4	4	1
611	5	4	5	3	6	3	2	4	4	1
612	5	4	5	3	6	4	2	4	4	1
613	5	4	5	3	6	4	2	4	4	1
614	5	4	5	3	6	4	2	4	4	1
615	5	4	5	3	6	4	2	4	4	1
616	5	4	5	3	6	4	2	4	4	1
617	5	4	5	3	6	4	2	4	4	1
618	5	4	5	3	6	4	2	4	4	1
619	5	4	5	3	6	4	2	4	4	1
620	5	4	5	3	6	4	2	4	4	2
621	5	4	5	3	6	4	2	4	4	2
622	5	4	5	3	6	4	2	4	4	2
623	5	4	5	3	6	4	2	4	4	2
624	5	4	5	3	6	4	2	4	4	2
625	5	4	5	4	6	4	2	5	4	2
626	5	4	5	4	6	4	2	5	4	2
627	5	4	5	4	6	4	2	5	4	2
628	5	4	5	4	6	4	2	5	4	2
629	5	4	5	4	6	4	2	5	4	2
630	5	4	6	4	6	4	2	6	4	2
631	5	4	6	5	6	4	2	6	4	2
632	6	4	6	6	6	4	2	6	4	3
633	6	4	6	6	6	4	2	6	4	3
634	6	4	6	6	6	4	2	6	4	3
635	6	4	6	6	6	4	2	6	4	3
636	6	4	6	6	6	4	2	6	4	3
637	6	5	6	6	6	4	2	6	4	3
638	6	5	6	6	6	4	2	6	4	3
639	6	5	6	6	6	4	2	6	4	3
640	6	5	6	7	6	4	2	6	4	3
641	6	5	6	7	6	4	2	6	4	3
642	6	5	6	7	6	4	2	6	4	3
643	6	5	6	7	6	4	2	6	4	3
644	7	5	7	7	6	4	2	6	4	3
645	7	5	7	7	6	4	2	6	4	3
646	7	6	7	7	6	4	3	6	4	3
647	7	6	7	7	6	4	3	6	4	3
648	7	6	7	7	6	4	3	6	4	3
649	7	6	7	7	6	4	3	6	4	3
650	7	6	7	7	6	4	3	6	4	3
651	7	6	7	7	6	4	3	6	4	3
652	7	6	7	7	6	4	3	6	4	3
653	7	6	7	7	6	4	3	6	4	4
654	7	6	7	7	7	5	3	6	4	4
655	7	6	7	7	7	5	3	6	4	4
656	7	6	7	7	7	5	3	6	4	4
657	7	6	7	7	7	5	3	6	4	4
658	7	6	7	8	7	5	3	6	4	4
659	7	6	7	8	7	5	3	6	4	4
660	7	6	7	8	7	5	3	6	4	4
661	7	6	7	8	7	5	3	6	4	4
662	7	6	7	8	7	5	4	6	4	4
663	7	6	7	8	7	5	4	6	4	4
664	7	6	7	8	7	5	4	6	4	4
665	7	6	7	9	7	5	4	6	4	4
666	7	6	7	9	7	5	4	6	4	4
667	7	6	7	9	7	5	4	6	4	4
668	7	6	7	9	7	5	4	6	4	4
669	7	6	7	9	7	5	4	6	4	4
670	7	6	7	9	7	5	4	6	4	4
671	7	6	7	9	7	5	4	6	4	4
672	7	6	7	9	7	5	4	7	4	4
673	7	6	7	9	7	5	4	7	4	4
674	7	6	7	9	7	5	4	7	4	4
675	7	6	7	9	7	5	4	7	4	4
676	7	6	7	9	7	5	4	7	4	4
677	7	6	7	9	7	5	4	7	4	4
678	7	6	7	9	7	5	4	7	4	4
679	7	6	7	9	7	5	4	7	4	4
680	7	6	7	9	7	5	4	7	4	4
681	7	6	7	9	7	5	4	7	5	4
682	7	6	7	9	7	6	4	7	5	4
683	7	7	7	9	7	6	4	7	5	4
684	7	7	7	9	7	6	4	7	5	4
685	7	7	7	9	7	6	4	7	5	4
686	7	7	7	9	7	6	4	7	5	4
687	7	7	7	9	7	6	4	7	5	4
688	9	7	7	9	7	6	4	7	5	4
689	9	7	7	9	7	6	4	7	5	4
690	9	7	7	9	7	6	5	7	6	4
691	9	7	7	9	7	6	5	7	6	4
692	9	7	7	9	7	6	5	7	6	4
693	9	7	8	9	7	6	5	7	7	4
694	9	7	8	9	7	6	5	7	7	4
695	9	7	8	9	7	6	5	7	7	4
696	9	7	8	10	7	6	5	7	7	5
697	9	7	8	10	7	6	5	7	7	5
698	9	7	8	10	7	6	5	7	7	5
699	9	7	8	10	7	6	5	7	7	5
700	9	7	8	10	7	6	5	7	7	5
701	9	7	8	10	7	6	5	7	7	5
702	9	7	8	10	7	6	6	7	7	5
703	9	7	8	10	7	6	6	7	7	5
704	9	7	8	10	7	6	6	7	7	5
705	9	7	8	10	7	6	6	7	7	5
706	9	7	8	10	7	6	6	7	7	5
707	9	7	8	10	7	6	6	7	7	5
708	9	7	8	10	7	7	6	8	7	5
709	9	7	8	10	7	7	6	8	7	5
710	9	7	8	10	7	7	6	8	7	5
711	9	7	8	10	7	7	6	8	7	5
712	9	7	8	10	7	7	6	8	7	5
713	9	7	8	10	7	7	6	8	7	5
714	9	7	8	10	7	7	6	8	7	5
715	9	7	8	10	7	7	6	8	7	5
716	9	7	8	10	7	7	6	8	7	6
717	9	7	8	10	7	7	6	8	7	6
718	9	7	8	10	7	7	6	8	7	6
719	9	7	8	10	7	7	6	8	7	6
720	9	7	8	10	7	7	6	8	7	6

## Sheet: MORTALITY FEMALES
Experimental day	Number of dead rats per group
females	Control isogenic	GMO 11% + R	GMO 22% + R	GMO 33% + R	GMO 11%	GMO 22%	GMO 33%	R (A)	R (B)	R (C)
0	0	0	0	0	0	0	0	0	0	0
1	0	0	0	0	0	0	0	0	0	0
2	0	0	0	0	0	0	0	0	0	0
3	0	0	0	0	0	0	0	0	0	0
4	0	0	0	0	0	0	0	0	0	0
5	0	0	0	0	0	0	0	0	0	0
6	0	0	0	0	0	0	0	0	0	0
7	0	0	0	0	0	0	0	0	0	0
8	0	0	0	0	0	0	0	0	0	0
9	0	0	0	0	0	0	0	0	0	0
10	0	0	0	0	0	0	0	0	0	0
11	0	0	0	0	0	0	0	0	0	0
12	0	0	0	0	0	0	0	0	0	0
13	0	0	0	0	0	0	0	0	0	0
14	0	0	0	0	0	0	0	0	0	0
15	0	0	0	0	0	0	0	0	0	0
16	0	0	0	0	0	0	0	0	0	0
17	0	0	0	0	0	0	0	0	0	0
18	0	0	0	0	0	0	0	0	0	0
19	0	0	0	0	0	0	0	0	0	0
20	0	0	0	0	0	0	0	0	0	0
21	0	0	0	0	0	0	0	0	0	0
22	0	0	0	0	0	0	0	0	0	0
23	0	0	0	0	0	0	0	0	0	0
24	0	0	0	0	0	0	0	0	0	0
25	0	0	0	0	0	0	0	0	0	0
26	0	0	0	0	0	0	0	0	0	0
27	0	0	0	0	0	0	0	0	0	0
28	0	0	0	0	0	0	0	0	0	0
29	0	0	0	0	0	0	0	0	0	0
30	0	0	0	0	0	0	0	0	0	0
31	0	0	0	0	0	0	0	0	0	0
32	0	0	0	0	0	0	0	0	0	0
33	0	0	0	0	0	0	0	0	0	0
34	0	0	0	0	0	0	0	0	0	0
35	0	0	0	0	0	0	0	0	0	0
36	0	0	0	0	0	0	0	0	0	0
37	0	0	0	0	0	0	0	0	0	0
38	0	0	0	0	0	0	0	0	0	0
39	0	0	0	0	0	0	0	0	0	0
40	0	0	0	0	0	0	0	0	0	0
41	0	0	0	0	0	0	0	0	0	0
42	0	0	0	0	0	0	0	0	0	0
43	0	0	0	0	0	0	0	0	0	0
44	0	0	0	0	0	0	0	0	0	0
45	0	0	0	0	0	0	0	0	0	0
46	0	0	0	0	0	0	0	0	0	0
47	0	0	0	0	0	0	0	0	0	0
48	0	0	0	0	0	0	0	0	0	0
49	0	0	0	0	0	0	0	0	0	0
50	0	0	0	0	0	0	0	0	0	0
51	0	0	0	0	0	0	0	0	0	0
52	0	0	0	0	0	0	0	0	0	0
53	0	0	0	0	0	0	0	0	0	0
54	0	0	0	0	0	0	0	0	0	0
55	0	0	0	0	0	0	0	0	0	0
56	0	0	0	0	0	0	0	0	0	0
57	0	0	0	0	0	0	0	0	0	0
58	0	0	0	0	0	0	0	0	0	0
59	0	0	0	0	0	0	0	0	0	0
60	0	0	0	0	0	0	0	0	0	0
61	0	0	0	0	0	0	0	0	0	0
62	0	0	0	0	0	0	0	0	0	0
63	0	0	0	0	0	0	0	0	0	0
64	0	0	0	0	0	0	0	0	0	0
65	0	0	0	0	0	0	0	0	0	0
66	0	0	0	0	0	0	0	0	0	0
67	0	0	0	0	0	0	0	0	0	0
68	0	0	0	0	0	0	0	0	0	0
69	0	0	0	0	0	0	0	0	0	0
70	0	0	0	0	0	0	0	0	0	0
71	0	0	0	0	0	0	0	0	0	0
72	0	0	0	0	0	0	0	0	0	0
73	0	0	0	0	0	0	0	0	0	0
74	0	0	0	0	0	0	0	0	0	0
75	0	0	0	0	0	0	0	0	0	0
76	0	0	0	0	0	0	0	0	0	0
77	0	0	0	0	0	0	0	0	0	0
78	0	0	0	0	0	0	0	0	0	0
79	0	0	0	0	0	0	0	0	0	0
80	0	0	0	0	0	0	0	0	0	0
81	0	0	0	0	0	0	0	0	0	0
82	0	0	0	0	0	0	0	0	0	0
83	0	0	0	0	0	0	0	0	0	0
84	0	0	0	0	0	0	0	0	0	0
85	0	0	0	0	0	0	0	0	0	0
86	0	0	0	0	0	0	0	0	0	0
87	0	0	0	0	0	0	0	0	0	0
88	0	0	0	0	0	0	0	0	0	0
89	0	0	0	0	0	0	0	0	0	0
90	0	0	0	0	0	0	0	0	0	0
91	0	0	0	0	0	0	0	0	0	0
92	0	0	0	0	0	0	0	0	0	0
93	0	0	0	0	0	0	0	0	0	0
94	0	0	0	0	0	0	0	0	0	0
95	0	0	0	0	0	0	0	0	0	0
96	0	0	0	0	0	0	0	0	0	0
97	0	0	0	0	0	0	0	0	0	0
98	0	0	0	0	0	0	0	0	0	0
99	0	0	0	0	0	0	0	0	0	0
100	0	0	0	0	0	0	0	0	0	0
101	0	0	0	0	0	0	0	0	0	0
102	0	0	0	0	0	0	0	0	0	0
103	0	0	0	0	0	0	0	0	0	0
104	0	0	0	0	0	0	0	0	0	0
105	0	0	0	0	0	0	0	0	0	0
106	0	0	0	0	0	0	0	0	0	0
107	0	0	0	0	0	0	0	0	0	0
108	0	0	0	0	0	0	0	0	0	0
109	0	0	0	0	0	0	0	0	0	0
110	0	0	0	0	0	0	0	0	0	0
111	0	0	0	0	0	0	0	0	0	0
112	0	0	0	0	0	0	0	0	0	0
113	0	0	0	0	0	0	0	0	0	0
114	0	0	0	0	0	0	0	0	0	0
115	0	0	0	0	0	0	0	0	0	0
116	0	0	0	0	0	0	0	0	0	0
117	0	0	0	0	0	0	0	0	0	0
118	0	0	0	0	0	0	0	0	0	0
119	0	0	0	0	0	0	0	0	0	0
120	0	0	0	0	0	0	0	0	0	0
121	0	0	0	0	0	0	0	0	0	0
122	0	0	0	0	0	0	0	0	0	0
123	0	0	0	0	0	0	0	0	0	0
124	0	0	0	0	0	0	0	0	0	0
125	0	0	0	0	0	0	0	0	0	0
126	0	0	0	0	0	0	0	0	0	0
127	0	0	0	0	0	0	0	0	0	0
128	0	0	0	0	0	0	0	0	0	0
129	0	0	0	0	0	0	0	0	0	0
130	0	0	0	0	0	0	0	0	0	0
131	0	0	0	0	0	0	0	0	0	0
132	0	0	0	0	0	0	0	0	0	0
133	0	0	0	0	0	0	0	0	0	0
134	0	0	0	0	0	0	0	0	0	0
135	0	0	0	0	0	0	0	0	0	0
136	0	0	0	0	0	0	0	0	0	0
137	0	0	0	0	0	0	0	0	0	0
138	0	0	0	0	0	0	0	0	0	0
139	0	0	0	0	0	0	0	0	0	0
140	0	0	0	0	0	0	0	0	0	0
141	0	0	0	0	0	0	0	0	0	0
142	0	0	0	0	0	0	0	0	0	0
143	0	0	0	0	0	0	0	0	0	0
144	0	0	0	0	0	0	0	0	0	0
145	0	0	0	0	0	0	0	0	0	0
146	0	0	0	0	0	0	0	0	0	0
147	0	0	0	0	0	0	0	0	0	0
148	0	0	0	0	0	0	0	0	0	0
149	0	0	0	0	0	0	0	0	0	0
150	0	0	0	0	0	0	0	0	0	0
151	0	0	0	0	0	0	0	0	0	0
152	0	0	0	0	0	0	0	0	0	0
153	0	0	0	0	0	0	0	0	0	0
154	0	0	0	0	0	0	0	0	0	0
155	0	0	0	0	0	0	0	0	0	0
156	0	0	0	0	0	0	0	0	0	0
157	0	0	0	0	0	0	0	0	0	0
158	0	0	0	0	0	0	0	0	0	0
159	0	0	0	0	0	0	0	0	0	0
160	0	0	0	0	0	0	0	0	0	0
161	0	0	0	0	0	0	0	0	0	0
162	0	0	0	0	0	0	0	0	0	0
163	0	0	0	0	0	0	0	0	0	0
164	0	0	0	0	0	0	0	0	0	0
165	0	0	0	0	0	0	0	0	0	0
166	0	0	0	0	0	0	0	0	0	0
167	0	0	0	0	0	0	0	0	0	0
168	0	0	0	0	0	0	0	0	0	0
169	0	0	0	0	0	0	0	0	0	0
170	0	0	0	0	0	0	0	0	0	0
171	0	0	0	0	0	0	0	0	0	0
172	0	0	0	0	0	0	0	0	0	0
173	0	0	0	0	0	0	0	0	0	0
174	0	0	0	0	0	0	0	0	0	0
175	0	0	0	0	0	0	0	0	0	0
176	0	0	0	0	0	0	0	0	0	0
177	0	0	0	0	0	0	0	0	0	0
178	0	0	0	0	0	0	0	0	0	0
179	0	0	0	0	0	0	0	0	0	0
180	0	0	0	0	0	0	0	0	0	0
181	0	0	0	0	0	0	0	0	0	0
182	0	0	0	0	0	0	0	0	0	0
183	0	0	0	0	0	0	0	0	0	0
184	0	0	0	0	0	0	0	0	0	0
185	0	0	0	0	0	0	0	0	0	0
186	0	0	0	0	0	0	0	0	0	0
187	0	0	0	0	0	0	0	0	0	0
188	0	0	0	0	0	0	0	0	0	0
189	0	0	0	0	0	0	0	0	0	0
190	0	0	0	0	0	0	0	0	0	0
191	0	0	0	0	0	0	0	0	0	0
192	0	0	0	0	0	0	0	0	0	0
193	0	0	0	0	0	0	0	0	0	0
194	0	0	0	0	0	0	0	0	0	0
195	0	0	0	0	0	0	0	0	0	0
196	0	0	0	0	0	0	0	0	0	0
197	0	0	0	0	0	0	0	0	0	0
198	0	0	0	0	0	0	0	0	0	0
199	0	0	0	0	0	0	0	0	0	0
200	0	0	0	0	0	0	0	0	0	0
201	0	0	0	0	0	0	0	0	0	0
202	0	0	0	0	0	0	0	0	0	0
203	0	0	0	0	0	0	0	0	0	0
204	0	0	0	0	0	0	0	0	0	0
205	0	0	0	0	0	0	0	0	0	0
206	0	0	0	0	0	0	0	0	0	0
207	0	0	0	0	0	0	0	0	0	0
208	0	0	0	0	0	0	0	0	0	0
209	0	0	0	0	0	0	0	0	0	0
210	0	0	0	0	0	0	0	0	0	0
211	0	0	0	0	0	0	0	0	0	0
212	0	0	0	0	0	0	0	0	0	0
213	0	0	0	0	0	0	0	0	0	0
214	0	0	0	0	0	0	0	0	0	0
215	0	0	0	0	0	0	0	0	0	0
216	0	0	0	0	0	0	0	0	0	0
217	0	0	0	0	0	0	0	0	0	0
218	0	0	0	0	0	0	0	0	0	0
219	0	0	0	0	0	0	0	0	0	0
220	0	0	0	0	0	0	0	0	0	0
221	0	0	0	0	0	0	0	0	0	0
222	0	0	0	0	0	0	0	0	0	0
223	0	0	0	0	0	0	0	0	0	0
224	0	0	0	0	0	0	0	0	0	0
225	0	0	0	0	0	0	0	0	0	0
226	0	0	0	0	0	0	0	0	0	0
227	0	0	0	0	0	0	0	0	0	0
228	0	0	0	0	0	0	0	0	0	0
229	0	0	0	0	0	0	0	0	0	0
230	0	0	0	0	0	0	0	0	0	0
231	0	0	0	0	0	0	0	0	0	0
232	0	0	0	0	0	0	0	0	0	0
233	0	0	0	0	0	0	0	0	0	0
234	0	0	0	0	0	0	0	0	0	0
235	0	0	0	0	0	0	0	0	0	0
236	0	0	0	0	0	0	0	0	0	0
237	0	0	0	0	0	0	0	0	0	0
238	0	0	0	0	0	0	0	0	0	0
239	0	0	0	0	0	0	0	0	0	0
240	0	0	0	0	0	0	0	0	0	0
241	0	0	0	0	0	0	0	0	0	0
242	0	0	0	0	0	0	0	0	0	0
243	0	0	0	0	0	0	0	0	0	0
244	0	0	0	0	0	0	0	0	0	0
245	0	0	0	0	0	0	0	0	0	0
246	0	0	0	0	0	0	0	0	0	0
247	0	0	0	0	0	0	0	0	0	0
248	0	0	0	0	0	0	0	0	0	0
249	0	0	0	0	0	0	0	0	0	0
250	0	0	0	0	0	0	0	0	0	0
251	0	0	0	0	0	0	0	0	0	0
252	0	0	0	0	0	0	0	0	0	0
253	0	0	0	0	0	0	0	0	0	0
254	0	0	0	0	0	0	0	0	0	0
255	0	0	0	0	0	0	0	0	0	0
256	0	0	0	0	0	0	0	0	0	0
257	0	0	0	0	0	0	0	0	0	0
258	0	0	0	0	0	0	0	0	0	0
259	0	0	0	0	0	0	0	0	0	0
260	0	0	0	0	0	0	0	0	0	0
261	0	0	0	0	0	0	0	0	0	0
262	0	0	0	0	0	0	0	0	0	0
263	0	0	0	0	0	0	0	0	0	0
264	0	0	0	0	0	0	0	0	0	0
265	0	0	0	0	0	0	0	0	0	0
266	0	0	0	0	0	0	0	0	0	0
267	0	0	0	0	0	0	0	0	0	0
268	0	0	0	0	0	0	0	0	0	0
269	0	0	0	0	0	0	0	0	0	0
270	0	0	0	0	0	0	0	0	0	0
271	0	0	0	0	0	0	0	0	0	0
272	0	0	0	0	0	0	0	0	0	0
273	0	0	0	0	0	0	0	0	0	0
274	0	0	0	0	0	0	0	0	0	0
275	0	0	0	0	0	0	0	0	0	0
276	0	0	0	0	0	0	0	0	0	0
277	0	0	0	0	0	0	0	0	0	0
278	0	0	0	0	0	0	0	0	0	0
279	0	0	0	0	0	0	0	0	0	0
280	0	0	0	0	0	0	0	0	0	0
281	0	0	0	0	0	0	0	0	0	0
282	0	0	0	0	0	0	0	0	0	0
283	0	0	0	0	0	0	0	0	0	0
284	0	0	0	0	0	0	0	0	0	0
285	0	0	0	0	0	0	0	0	0	0
286	0	0	0	0	0	0	0	0	0	0
287	0	0	0	0	0	0	0	0	0	0
288	0	0	0	0	0	0	0	0	0	0
289	0	0	0	0	0	0	0	0	0	0
290	0	0	0	0	0	0	0	0	0	0
291	0	0	0	0	0	0	0	0	0	0
292	0	0	0	0	0	0	0	0	0	0
293	0	0	0	0	0	0	0	0	0	0
294	0	0	0	0	0	1	0	0	0	0
295	0	0	0	0	0	1	0	0	0	0
296	0	0	0	0	0	1	0	0	0	0
297	0	0	0	0	0	1	0	0	0	0
298	0	0	0	0	0	1	0	0	0	0
299	0	0	0	0	0	1	0	0	0	0
300	0	0	0	0	0	1	0	0	0	0
301	0	0	0	0	0	1	0	0	0	0
302	0	0	0	0	0	1	0	0	0	0
303	0	0	0	0	0	1	0	0	0	0
304	0	0	0	0	0	1	0	0	0	0
305	0	0	0	0	0	1	0	0	0	0
306	0	0	0	0	0	1	0	0	0	0
307	0	0	0	0	0	1	0	0	0	0
308	0	0	0	0	0	1	0	0	0	0
309	0	0	0	0	0	1	0	0	0	0
310	0	0	0	0	0	1	0	0	0	0
311	0	0	0	0	0	1	0	0	0	0
312	0	0	0	0	0	1	0	0	0	0
313	0	0	0	0	0	1	0	0	0	0
314	0	0	0	0	0	1	0	0	0	0
315	0	0	0	0	0	1	0	0	1	0
316	0	0	0	0	0	1	0	0	1	0
317	0	0	0	0	0	1	0	0	1	0
318	0	0	0	0	0	1	0	0	1	0
319	0	0	0	0	0	1	0	0	1	0
320	0	0	0	0	0	1	0	0	1	0
321	0	0	0	0	0	1	0	0	1	0
322	0	0	0	0	0	1	0	0	1	0
323	0	0	0	0	0	1	0	0	1	0
324	0	0	0	0	0	1	0	0	1	0
325	0	0	0	0	0	1	0	0	1	0
326	0	0	0	0	0	1	0	0	1	0
327	0	0	0	0	0	1	0	0	1	0
328	0	0	0	0	0	1	0	0	1	0
329	0	0	0	0	0	1	0	0	1	0
330	0	0	0	0	0	1	0	0	1	0
331	0	0	0	0	0	1	0	0	1	0
332	0	0	0	0	0	1	0	0	1	0
333	0	0	0	0	0	1	0	0	1	0
334	0	0	0	0	0	1	0	0	1	0
335	0	0	0	0	0	1	0	0	1	0
336	0	0	0	0	0	1	0	0	1	0
337	0	0	0	0	0	1	0	0	1	0
338	0	0	0	0	0	1	0	0	1	0
339	0	0	0	0	0	1	0	0	1	0
340	0	0	0	0	0	1	0	0	1	0
341	0	0	0	0	0	1	0	0	1	0
342	0	0	0	0	0	1	0	0	1	0
343	0	0	0	0	0	1	0	0	1	0
344	0	0	0	0	0	1	0	0	1	0
345	0	0	0	0	0	1	0	1	1	0
346	0	0	0	0	0	1	0	1	1	0
347	0	0	0	0	0	1	0	1	1	0
348	0	0	0	0	0	1	0	1	1	0
349	0	0	0	0	0	1	0	1	1	0
350	0	0	0	0	0	1	0	1	1	0
351	0	0	0	0	0	1	0	1	1	0
352	0	0	0	0	0	1	0	1	1	0
353	0	0	0	0	0	1	0	1	1	0
354	0	0	0	0	0	1	0	1	1	0
355	0	0	0	0	0	1	0	1	1	0
356	0	0	0	0	0	1	0	1	1	0
357	0	0	0	0	0	1	0	1	1	0
358	0	0	0	0	0	1	0	1	1	0
359	0	0	0	0	0	1	0	1	1	0
360	0	0	0	0	0	1	0	1	1	0
361	0	0	0	0	0	1	0	1	1	0
362	0	0	0	0	0	1	0	1	1	0
363	0	0	0	0	0	1	0	1	1	0
364	0	0	0	0	0	1	0	1	1	0
365	0	0	0	0	0	1	0	1	1	0
366	0	0	0	0	0	1	0	1	1	0
367	0	0	0	0	0	1	0	1	1	0
368	0	0	0	0	0	1	0	1	1	0
369	0	0	0	0	0	1	0	1	1	0
370	0	0	0	0	0	1	0	1	1	0
371	0	0	0	0	0	1	0	1	1	0
372	0	0	0	0	0	1	0	1	1	0
373	0	0	0	0	0	1	0	1	1	0
374	0	0	0	0	0	1	0	1	1	0
375	0	0	0	0	0	1	0	1	1	0
376	0	0	0	0	0	1	0	1	1	0
377	0	0	0	0	0	1	0	1	1	0
378	0	0	0	0	0	1	0	1	1	0
379	0	0	0	0	0	1	0	1	1	0
380	0	0	0	0	0	1	0	1	1	0
381	0	0	0	0	0	1	0	1	1	0
382	0	0	0	0	0	1	0	1	1	0
383	0	0	0	0	0	1	0	1	1	0
384	0	0	0	0	0	1	0	1	1	0
385	0	0	0	0	0	1	0	1	1	0
386	0	0	0	0	0	1	0	1	1	0
387	0	0	0	0	0	1	0	1	1	0
388	0	0	0	0	0	1	0	1	1	0
389	0	0	0	0	0	1	0	1	1	0
390	0	0	0	0	0	1	0	1	1	0
391	0	0	0	0	0	1	0	1	1	0
392	0	0	0	0	0	1	0	1	1	0
393	0	0	0	0	0	1	1	1	1	0
394	0	0	0	0	0	1	1	1	1	0
395	0	0	0	0	0	1	1	1	1	0
396	0	0	0	0	0	1	1	1	1	0
397	0	0	0	0	0	1	1	1	1	0
398	0	0	0	0	0	1	1	1	1	0
399	0	0	0	0	0	1	1	1	1	0
400	0	0	0	0	0	1	1	1	1	0
401	0	0	0	0	0	1	1	1	1	0
402	0	0	0	0	0	1	1	1	1	0
403	0	0	0	0	0	1	1	1	1	0
404	0	0	0	0	0	1	1	1	1	0
405	0	0	0	0	0	1	1	1	1	0
406	0	0	0	0	0	1	1	1	1	0
407	0	0	0	0	0	1	1	1	1	0
408	0	0	0	0	0	1	1	1	1	0
409	0	0	0	0	0	1	1	1	1	0
410	0	0	0	0	0	1	1	1	1	0
411	0	0	0	0	0	1	1	1	1	0
412	0	0	0	0	0	1	1	1	1	0
413	0	0	0	0	0	1	1	1	1	0
414	0	0	0	0	0	1	1	1	1	0
415	0	0	0	0	0	1	1	1	1	0
416	0	0	0	0	0	1	1	1	1	0
417	0	0	0	0	0	1	1	1	1	0
418	0	0	0	0	0	1	1	1	1	0
419	0	0	0	0	0	1	1	1	1	0
420	0	0	0	0	0	1	1	1	1	0
421	0	0	0	0	0	1	2	1	1	0
422	0	0	0	0	0	1	2	1	1	0
423	0	0	0	0	0	1	2	1	1	0
424	0	0	0	0	0	1	2	1	1	0
425	0	0	0	0	0	1	2	1	1	0
426	0	0	0	0	0	1	2	1	1	0
427	0	0	0	0	0	1	2	1	1	0
428	0	0	0	0	0	1	2	1	1	0
429	0	0	0	0	0	1	2	1	1	0
430	0	0	0	0	0	1	2	1	1	0
431	0	0	0	0	0	1	2	1	1	0
432	0	0	0	0	0	1	2	1	1	0
433	0	0	0	0	0	1	2	1	1	0
434	0	0	0	0	0	1	2	1	1	0
435	0	0	0	0	0	1	2	1	1	0
436	0	0	0	0	0	1	2	1	1	0
437	0	0	0	0	0	1	2	1	1	0
438	0	0	0	0	0	1	2	1	1	0
439	0	0	0	0	0	1	2	1	1	0
440	0	0	0	0	0	1	2	1	1	0
441	0	0	0	0	0	1	2	1	1	0
442	0	0	0	0	0	1	2	1	1	0
443	0	0	0	0	0	1	2	1	1	0
444	0	0	0	0	0	1	2	1	1	0
445	0	0	0	0	0	1	2	1	1	0
446	0	0	0	0	0	1	2	1	1	0
447	0	0	0	0	0	1	2	1	1	0
448	0	0	0	0	0	1	2	1	1	0
449	0	0	0	0	0	1	2	1	1	0
450	0	0	0	0	0	1	2	1	1	0
451	0	0	0	0	0	1	2	1	1	0
452	0	0	0	0	0	1	2	1	1	0
453	0	0	0	0	0	1	2	1	1	0
454	0	0	0	0	0	1	2	1	1	0
455	0	0	0	0	0	1	2	1	1	0
456	0	0	0	0	0	1	2	1	1	0
457	0	0	0	0	0	1	2	1	1	1
458	0	0	0	0	0	1	2	1	1	1
459	0	0	0	0	0	1	2	1	1	1
460	0	0	0	0	0	1	2	1	1	1
461	0	0	0	0	0	1	2	1	1	1
462	0	0	0	0	0	1	2	1	1	1
463	0	0	0	0	0	1	2	1	1	1
464	0	0	0	0	0	1	2	1	1	1
465	0	0	0	0	0	1	3	1	1	1
466	0	0	0	0	0	1	3	1	1	1
467	0	0	0	0	0	1	3	1	1	1
468	0	0	0	0	0	1	3	1	1	1
469	0	0	0	0	0	1	3	1	1	1
470	0	0	0	0	0	1	3	1	1	2
471	0	0	0	0	0	1	3	1	1	2
472	0	0	0	0	0	1	3	1	1	2
473	0	0	0	0	0	1	3	1	1	2
474	0	0	0	0	0	1	3	1	1	2
475	0	0	0	0	0	1	3	1	1	2
476	0	0	0	0	0	2	3	1	1	2
477	0	0	0	0	0	2	3	1	1	2
478	0	0	0	0	0	2	3	1	1	2
479	0	0	0	0	0	2	3	1	1	2
480	0	0	0	0	0	2	3	1	1	2
481	0	0	0	0	0	2	3	1	1	2
482	0	0	0	0	0	2	3	1	1	2
483	0	0	0	0	0	2	3	1	1	2
484	0	0	0	0	0	3	3	1	1	2
485	0	0	0	0	0	3	3	1	1	2
486	0	0	0	0	0	3	3	1	1	2
487	0	0	0	0	0	3	3	1	1	2
488	0	0	0	0	0	3	3	1	1	2
489	0	0	0	0	0	3	3	1	1	2
490	0	0	0	0	0	3	3	1	1	2
491	0	0	0	0	0	3	3	1	1	2
492	0	0	0	0	0	3	3	1	1	2
493	0	0	0	0	0	3	3	1	1	2
494	0	0	0	0	0	3	3	1	1	2
495	0	0	0	0	0	3	3	1	1	2
496	0	0	0	0	0	3	3	1	1	2
497	0	0	0	0	0	3	3	1	1	2
498	0	0	1	0	0	3	3	1	1	2
499	0	0	1	0	0	3	3	1	1	2
500	0	0	1	0	0	3	3	1	1	2
501	0	0	1	0	0	3	3	1	1	2
502	0	0	1	0	0	3	3	1	1	2
503	0	0	1	0	0	3	3	1	1	2
504	0	0	1	0	0	3	3	1	1	2
505	0	1	1	0	0	3	3	2	1	2
506	0	1	1	0	0	3	3	2	1	2
507	0	1	1	0	0	3	3	2	1	2
508	0	1	1	0	0	3	3	2	1	2
509	0	1	1	0	0	3	3	2	1	2
510	0	2	1	0	0	3	3	2	1	2
511	0	2	1	0	0	3	3	2	1	2
512	0	2	1	0	0	4	3	2	1	2
513	0	2	1	0	0	4	3	2	1	2
514	0	2	1	0	0	4	3	2	1	2
515	0	2	1	0	0	4	3	2	1	2
516	0	2	1	0	0	4	3	2	1	2
517	0	2	1	0	0	4	3	2	1	2
518	0	2	1	0	0	4	3	2	1	2
519	0	2	1	0	0	4	3	2	1	2
520	0	2	1	0	0	4	3	2	1	2
521	0	2	1	0	0	4	3	2	1	2
522	0	2	1	0	0	4	3	2	1	2
523	0	2	1	0	0	4	3	2	1	2
524	0	2	1	0	0	4	3	2	1	2
525	0	2	1	0	0	4	3	2	1	2
526	0	2	1	0	0	4	3	2	1	2
527	0	2	1	0	0	4	3	2	1	2
528	0	2	1	0	0	4	3	2	1	2
529	0	2	1	0	0	4	3	2	1	2
530	0	2	1	0	0	4	3	2	1	2
531	0	2	1	0	0	4	3	2	1	2
532	0	2	1	0	0	4	3	2	1	2
533	0	2	1	0	0	4	3	3	1	2
534	0	2	1	0	0	4	3	3	1	2
535	0	2	1	0	0	4	3	3	1	2
536	0	2	1	0	0	4	3	3	1	2
537	0	2	1	0	0	4	3	3	1	2
538	0	2	1	0	0	4	3	3	1	2
539	0	2	1	0	0	4	3	3	1	3
540	1	2	1	0	0	4	3	3	1	3
541	1	2	1	0	0	4	3	3	1	3
542	1	2	1	0	0	4	3	3	1	3
543	1	2	1	0	0	4	3	3	1	3
544	1	2	1	0	0	4	3	3	1	3
545	1	2	1	0	0	4	3	3	1	3
546	1	2	1	0	0	6	3	3	1	3
547	1	2	1	0	0	6	3	3	1	3
548	1	2	1	0	0	6	3	3	1	3
549	1	2	1	0	0	6	3	3	1	3
550	1	2	1	0	0	6	3	3	1	3
551	1	2	1	0	0	6	3	3	1	3
552	1	2	1	0	0	6	3	3	1	3
553	1	2	1	0	0	6	3	3	1	3
554	1	2	2	1	0	6	3	3	1	3
555	1	2	2	1	0	6	3	3	1	3
556	1	2	2	1	0	6	3	3	1	3
557	1	2	2	1	0	6	3	3	1	3
558	1	2	2	1	0	6	3	3	1	3
559	1	2	2	1	0	6	3	3	1	3
560	1	2	2	1	0	6	3	3	1	3
561	1	2	2	1	0	6	3	3	1	3
562	1	2	2	1	0	6	3	3	1	3
563	1	2	2	1	0	6	3	3	1	3
564	1	2	2	1	0	6	3	3	1	3
565	1	2	2	1	0	6	3	3	1	3
566	1	2	2	1	0	6	3	3	1	3
567	1	2	2	1	0	6	3	3	1	3
568	1	2	2	1	0	6	3	3	1	3
569	1	2	2	1	0	6	3	3	1	3
570	1	2	2	1	0	6	3	3	1	3
571	1	2	2	1	0	6	3	3	1	3
572	1	2	2	1	0	6	3	3	1	3
573	1	2	2	1	0	6	3	3	1	3
574	1	2	2	1	0	6	3	3	1	3
575	1	2	2	1	0	6	3	3	1	3
576	1	2	2	1	0	6	3	3	1	3
577	1	2	2	1	0	6	3	3	1	3
578	1	2	2	1	0	6	3	3	1	3
579	1	2	2	1	0	6	3	3	1	3
580	1	2	2	1	0	6	3	3	1	3
581	1	2	2	1	0	6	3	3	1	3
582	1	2	2	1	0	6	3	3	2	3
583	1	2	2	1	0	6	3	3	2	3
584	1	2	2	1	0	6	3	3	2	3
585	1	2	2	1	0	6	3	3	2	3
586	1	2	2	1	0	6	3	3	2	3
587	1	2	2	1	0	6	3	3	2	3
588	1	2	2	1	0	6	3	3	2	3
589	1	2	2	1	0	6	3	3	2	3
590	1	2	2	1	0	6	3	3	2	3
591	1	2	2	1	0	6	3	3	2	3
592	1	2	2	1	0	6	3	3	2	3
593	1	2	2	1	0	6	3	3	2	3
594	1	2	2	1	0	6	3	3	2	3
595	1	2	2	1	0	6	3	3	2	3
596	1	2	2	1	0	6	3	3	2	3
597	1	2	2	1	0	6	3	3	2	3
598	1	2	2	1	0	6	3	3	2	3
599	1	2	2	1	0	6	3	3	2	3
600	1	2	2	1	0	6	3	3	2	3
601	1	2	2	2	0	6	3	3	2	3
602	1	2	2	2	0	6	3	3	2	3
603	1	2	3	3	0	6	3	3	2	3
604	1	2	3	3	0	6	3	3	2	3
605	1	2	3	3	0	6	3	3	2	3
606	1	2	3	3	0	6	3	3	2	3
607	1	2	3	3	0	6	3	3	2	3
608	1	2	3	3	0	6	3	3	2	3
609	1	2	3	3	0	6	3	3	2	3
610	1	2	3	3	0	6	3	3	2	3
611	1	2	4	3	0	6	3	3	2	3
612	1	2	4	3	0	6	3	3	2	3
613	1	2	4	3	0	6	3	3	2	3
614	1	2	4	3	0	6	3	3	2	3
615	1	2	4	3	0	6	3	3	2	3
616	1	2	4	3	0	6	3	3	2	3
617	1	2	5	3	0	6	3	3	2	3
618	1	2	5	3	0	6	3	3	2	3
619	1	2	5	3	0	6	3	3	2	3
620	1	2	5	3	0	6	3	3	2	3
621	1	2	5	3	0	6	3	3	2	3
622	1	2	5	3	0	6	3	3	2	3
623	1	2	5	3	0	6	3	3	2	3
624	1	2	5	3	0	6	3	3	2	3
625	1	2	5	3	0	6	3	3	2	3
626	1	2	5	3	0	6	3	3	2	3
627	1	2	5	3	0	6	3	3	2	3
628	1	2	5	3	0	6	3	3	2	3
629	1	2	5	3	0	6	3	3	2	3
630	1	2	5	3	0	6	3	3	2	3
631	1	2	5	4	0	6	3	3	4	3
632	1	2	5	4	0	6	3	3	4	3
633	1	2	5	4	0	6	3	3	4	3
634	1	2	5	4	0	6	3	3	4	3
635	1	2	5	4	0	6	3	3	4	3
636	1	2	5	4	0	6	3	3	4	3
637	1	2	5	4	0	6	3	3	4	3
638	1	2	5	4	0	6	3	3	4	3
639	1	2	6	4	0	6	4	3	5	3
640	1	2	6	4	0	6	4	3	5	3
641	1	2	6	4	0	6	4	3	5	3
642	1	2	6	4	0	6	4	3	5	3
643	1	2	6	4	0	6	4	3	5	3
644	1	2	6	4	0	6	4	3	5	3
645	1	2	6	4	1	6	4	3	5	3
646	2	2	6	4	1	6	4	3	5	3
647	2	2	6	4	1	7	4	3	5	3
648	2	2	6	4	1	7	4	3	5	3
649	2	2	6	4	1	7	4	3	5	3
650	2	2	6	4	1	7	4	3	5	3
651	2	2	6	4	1	7	4	3	5	3
652	2	2	6	4	1	7	4	3	5	4
653	2	2	6	4	1	7	4	3	5	4
654	2	2	6	4	1	7	4	3	5	4
655	2	2	6	4	1	7	4	3	5	4
656	2	2	6	4	1	7	4	3	5	4
657	2	2	6	4	2	7	4	3	5	4
658	2	2	6	4	2	7	4	3	5	4
659	2	2	6	4	3	7	4	3	5	4
660	2	2	6	4	3	7	4	3	5	4
661	2	2	6	4	3	7	4	3	5	4
662	2	2	6	4	3	7	4	3	5	4
663	2	2	6	4	3	7	4	3	5	4
664	2	2	6	4	3	7	4	3	5	4
665	2	2	6	4	3	7	4	3	5	4
666	2	2	6	4	3	7	4	3	5	4
667	2	3	6	4	3	7	4	3	5	4
668	2	3	6	4	3	7	4	3	5	4
669	2	3	6	4	3	7	4	3	5	4
670	2	3	6	4	3	7	4	3	5	4
671	2	3	6	4	3	7	4	3	5	4
672	2	3	6	4	3	7	4	3	5	4
673	2	4	7	4	3	7	4	3	5	4
674	2	4	7	4	3	7	4	3	5	4
675	2	4	7	4	3	7	4	3	5	4
676	2	4	7	4	3	7	4	3	5	4
677	2	4	7	4	3	7	4	3	5	4
678	2	4	7	4	3	7	4	3	5	4
679	2	4	7	4	3	7	4	3	5	4
680	2	4	7	4	3	7	4	5	5	4
681	2	4	7	4	3	7	4	5	5	4
682	2	4	7	4	3	7	4	5	5	4
683	2	4	7	4	3	7	4	5	5	4
684	2	4	7	4	3	7	4	5	5	4
685	2	4	7	4	3	7	4	5	5	4
686	2	4	7	4	3	7	5	5	5	4
687	2	4	7	4	3	7	5	5	5	4
688	2	5	7	4	3	7	5	5	5	4
689	2	5	7	4	3	7	5	5	5	4
690	2	5	7	4	3	7	5	5	5	4
691	2	5	7	4	3	7	5	5	5	4
692	2	5	7	4	3	7	5	5	5	4
693	2	5	7	4	3	7	5	5	5	4
694	2	5	7	4	3	7	5	5	5	4
695	2	5	7	4	5	7	5	5	5	4
696	2	5	7	4	5	7	5	5	5	5
697	2	5	7	4	5	7	5	5	5	5
698	2	5	7	4	5	7	5	5	5	5
699	2	5	7	4	5	7	5	5	5	5
700	2	5	7	4	5	7	5	5	5	5
701	2	5	7	4	5	7	5	6	5	5
702	2	5	7	4	5	7	5	6	5	5
703	2	5	7	4	5	7	5	6	5	5
704	2	5	7	4	5	7	5	6	5	5
705	2	5	7	4	5	7	5	6	5	5
706	2	5	7	4	5	7	5	6	5	5
707	2	5	7	4	5	7	5	6	5	5
708	2	5	7	4	5	7	5	6	5	5
709	2	5	7	4	5	7	5	6	5	5
710	2	5	7	4	5	7	5	6	5	5
711	2	5	7	4	5	7	5	6	5	5
712	2	5	7	4	5	7	5	6	5	5
713	2	5	7	4	5	7	5	6	5	5
714	2	5	7	4	5	7	5	6	5	5
715	2	5	7	4	5	7	6	7	5	5
716	2	5	7	4	5	7	6	7	5	5
717	2	5	7	4	5	7	6	7	5	5
718	2	5	7	4	5	7	6	7	5	5
719	2	5	7	4	5	7	6	7	5	5
720	2	5	7	4	5	7	6	7	5	5

## Sheet: TUMORS MALES
Experimental day	Number of tumors per group
Males	Control isogenic	GMO 11% + R	GMO 22% + R	GMO 33% + R	GMO 11%	GMO 22%	GMO 33%	R (A)	R (B)	R (C)
0	0	0	0	0	0	0	0	0	0	0
1	0	0	0	0	0	0	0	0	0	0
2	0	0	0	0	0	0	0	0	0	0
3	0	0	0	0	0	0	0	0	0	0
4	0	0	0	0	0	0	0	0	0	0
5	0	0	0	0	0	0	0	0	0	0
6	0	0	0	0	0	0	0	0	0	0
7	0	0	0	0	0	0	0	0	0	0
8	0	0	0	0	0	0	0	0	0	0
9	0	0	0	0	0	0	0	0	0	0
10	0	0	0	0	0	0	0	0	0	0
11	0	0	0	0	0	0	0	0	0	0
12	0	0	0	0	0	0	0	0	0	0
13	0	0	0	0	0	0	0	0	0	0
14	0	0	0	0	0	0	0	0	0	0
15	0	0	0	0	0	0	0	0	0	0
16	0	0	0	0	0	0	0	0	0	0
17	0	0	0	0	0	0	0	0	0	0
18	0	0	0	0	0	0	0	0	0	0
19	0	0	0	0	0	0	0	0	0	0
20	0	0	0	0	0	0	0	0	0	0
21	0	0	0	0	0	0	0	0	0	0
22	0	0	0	0	0	0	0	0	0	0
23	0	0	0	0	0	0	0	0	0	0
24	0	0	0	0	0	0	0	0	0	0
25	0	0	0	0	0	0	0	0	0	0
26	0	0	0	0	0	0	0	0	0	0
27	0	0	0	0	0	0	0	0	0	0
28	0	0	0	0	0	0	0	0	0	0
29	0	0	0	0	0	0	0	0	0	0
30	0	0	0	0	0	0	0	0	0	0
31	0	0	0	0	0	0	0	0	0	0
32	0	0	0	0	0	0	0	0	0	0
33	0	0	0	0	0	0	0	0	0	0
34	0	0	0	0	0	0	0	0	0	0
35	0	0	0	0	0	0	0	0	0	0
36	0	0	0	0	0	0	0	0	0	0
37	0	0	0	0	0	0	0	0	0	0
38	0	0	0	0	0	0	0	0	0	0
39	0	0	0	0	0	0	0	0	0	0
40	0	0	0	0	0	0	0	0	0	0
41	0	0	0	0	0	0	0	0	0	0
42	0	0	0	0	0	0	0	0	0	0
43	0	0	0	0	0	0	0	0	0	0
44	0	0	0	0	0	0	0	0	0	0
45	0	0	0	0	0	0	0	0	0	0
46	0	0	0	0	0	0	0	0	0	0
47	0	0	0	0	0	0	0	0	0	0
48	0	0	0	0	0	0	0	0	0	0
49	0	0	0	0	0	0	0	0	0	0
50	0	0	0	0	0	0	0	0	0	0
51	0	0	0	0	0	0	0	0	0	0
52	0	0	0	0	0	0	0	0	0	0
53	0	0	0	0	0	0	0	0	0	0
54	0	0	0	0	0	0	0	0	0	0
55	0	0	0	0	0	0	0	0	0	0
56	0	0	0	0	0	0	0	0	0	0
57	0	0	0	0	0	0	0	0	0	0
58	0	0	0	0	0	0	0	0	0	0
59	0	0	0	0	0	0	0	0	0	0
60	0	0	0	0	0	0	0	0	0	0
61	0	0	0	0	0	0	0	0	0	0
62	0	0	0	0	0	0	0	0	0	0
63	0	0	0	0	0	0	0	0	0	0
64	0	0	0	0	0	0	0	0	0	0
65	0	0	0	0	0	0	0	0	0	0
66	0	0	0	0	0	0	0	0	0	0
67	0	0	0	0	0	0	0	0	0	0
68	0	0	0	0	0	0	0	0	0	0
69	0	0	0	0	0	0	0	0	0	0
70	0	0	0	0	0	0	0	0	0	0
71	0	0	0	0	0	0	0	0	0	0
72	0	0	0	0	0	0	0	0	0	0
73	0	0	0	0	0	0	0	0	0	0
74	0	0	0	0	0	0	0	0	0	0
75	0	0	0	0	0	0	0	0	0	0
76	0	0	0	0	0	0	0	0	0	0
77	0	0	0	0	0	0	0	0	0	0
78	0	0	0	0	0	0	0	0	0	0
79	0	0	0	0	0	0	0	0	0	0
80	0	0	0	0	0	0	0	0	0	0
81	0	0	0	0	0	0	0	0	0	0
82	0	0	0	0	0	0	0	0	0	0
83	0	0	0	0	0	0	0	0	0	0
84	0	0	0	0	0	0	0	0	0	0
85	0	0	0	0	0	0	0	0	0	0
86	0	0	0	0	0	0	0	0	0	0
87	0	0	0	0	0	0	0	0	0	0
88	0	0	0	0	0	0	0	0	0	0
89	0	0	0	0	0	0	0	0	0	0
90	0	0	0	0	0	0	0	0	0	0
91	0	0	0	0	0	0	0	0	0	0
92	0	0	0	0	0	0	0	0	0	0
93	0	0	0	0	0	0	0	0	0	0
94	0	0	0	0	0	0	0	0	0	0
95	0	0	0	0	1	0	0	0	0	0
96	0	0	0	0	1	0	0	0	0	0
97	0	0	0	0	1	0	0	0	0	0
98	0	0	0	0	1	0	0	0	0	0
99	0	0	0	0	1	0	0	0	0	0
100	0	0	0	0	1	0	0	0	0	0
101	0	0	0	0	1	0	0	0	0	0
102	0	0	0	0	1	0	0	0	0	0
103	0	0	0	0	1	0	0	0	0	0
104	0	0	0	0	1	0	0	0	0	0
105	0	0	0	0	1	0	0	0	0	0
106	0	0	0	0	1	0	0	0	0	0
107	0	0	0	0	1	0	0	0	0	0
108	0	0	0	0	1	0	0	0	0	0
109	0	0	0	0	1	0	0	0	0	0
110	0	0	0	0	1	0	0	0	0	0
111	0	0	0	0	1	0	0	0	0	0
112	0	0	0	0	1	0	0	0	0	0
113	0	0	1	0	1	0	0	0	0	0
114	0	0	1	0	1	0	0	0	0	0
115	0	0	1	0	1	0	0	0	0	0
116	0	0	1	0	1	0	0	0	0	0
117	0	0	1	0	1	0	0	0	0	0
118	0	0	1	0	1	0	0	0	0	0
119	0	0	1	0	1	0	0	0	0	0
120	0	0	1	0	1	0	0	0	0	0
121	0	0	1	0	1	0	0	0	0	0
122	0	0	1	0	1	0	0	0	0	0
123	0	0	1	0	1	0	0	0	0	0
124	0	0	1	0	1	0	0	0	0	0
125	0	0	1	0	1	0	0	0	0	0
126	0	0	1	0	1	0	0	0	0	0
127	0	0	1	0	1	0	0	0	0	0
128	0	0	1	0	1	0	0	0	0	0
129	0	0	1	0	1	0	0	0	0	0
130	0	0	1	0	1	0	0	0	0	0
131	0	0	1	0	1	0	0	0	0	0
132	0	0	1	0	1	0	0	0	0	0
133	0	0	1	0	1	0	0	0	0	0
134	0	0	1	0	1	0	0	0	0	0
135	0	0	1	0	1	0	0	0	0	0
136	0	0	1	0	1	0	0	0	0	0
137	0	0	1	0	1	0	0	0	0	0
138	0	0	1	0	1	0	0	0	0	0
139	0	0	1	0	1	0	0	0	0	0
140	0	0	1	0	1	0	0	0	0	0
141	0	0	1	0	1	0	0	0	0	0
142	0	0	1	0	1	0	0	0	0	0
143	0	0	1	0	1	0	0	0	0	0
144	0	0	1	0	1	0	0	0	0	0
145	0	0	1	0	1	0	0	0	0	0
146	0	0	1	0	1	0	0	0	0	0
147	0	0	1	0	1	0	0	0	0	0
148	0	0	1	0	1	0	0	0	0	0
149	0	0	1	0	1	0	0	0	0	0
150	0	0	1	0	1	0	0	0	0	0
151	0	0	1	0	1	0	0	0	0	0
152	0	0	1	0	1	0	0	0	0	0
153	0	0	1	0	1	0	0	0	0	0
154	0	0	1	0	1	0	0	0	0	0
155	0	0	1	0	1	0	0	0	0	0
156	0	0	1	0	1	0	0	0	0	0
157	0	0	1	0	1	0	0	0	0	0
158	0	0	1	0	1	0	0	0	0	0
159	0	0	1	0	1	0	0	0	0	0
160	0	0	1	0	1	0	0	0	0	0
161	0	0	1	0	1	0	0	0	0	0
162	0	0	1	0	1	0	0	0	0	0
163	0	0	1	0	1	0	0	0	0	0
164	0	0	1	0	1	0	0	0	0	0
165	0	0	1	0	1	0	0	0	0	0
166	0	0	1	0	1	0	0	0	0	0
167	0	0	1	0	1	0	0	0	0	0
168	0	0	1	0	1	0	0	0	0	0
169	0	0	1	0	1	0	0	0	0	0
170	0	0	1	0	1	0	0	0	0	0
171	0	0	1	0	1	0	0	0	0	0
172	0	0	1	0	1	0	0	0	0	0
173	0	0	1	0	1	0	0	0	0	0
174	0	0	1	0	1	0	0	0	0	0
175	0	0	1	0	1	0	0	0	0	0
176	0	0	1	0	1	0	0	0	0	0
177	0	0	1	0	1	0	0	0	0	0
178	0	0	1	0	1	0	0	0	0	0
179	0	0	1	0	1	0	0	0	0	0
180	0	0	1	0	1	0	0	0	0	0
181	0	0	1	0	1	0	0	0	0	0
182	0	0	1	0	1	0	0	0	0	0
183	0	0	1	0	1	0	0	0	0	0
184	0	0	1	0	1	0	0	0	0	0
185	0	0	1	0	1	0	0	0	0	0
186	0	0	1	0	1	0	0	0	0	0
187	0	0	1	0	1	0	0	0	0	0
188	0	0	1	0	1	0	0	0	0	0
189	0	0	1	0	1	0	0	0	0	0
190	0	0	1	0	1	0	0	0	0	0
191	0	0	1	0	1	0	0	0	0	0
192	0	0	1	0	1	0	0	0	0	0
193	0	0	1	0	1	0	0	0	0	0
194	0	0	1	0	1	0	0	0	0	0
195	0	0	1	0	1	0	0	0	0	0
196	0	0	1	0	1	0	0	0	0	0
197	0	0	1	0	1	0	0	0	0	0
198	0	0	1	0	1	0	0	0	0	0
199	0	0	1	0	1	0	0	0	0	0
200	0	0	1	0	1	0	0	0	0	0
201	0	0	1	0	1	0	0	0	0	0
202	0	0	1	0	1	0	0	0	0	0
203	0	0	1	0	1	0	0	0	0	0
204	0	0	1	0	1	0	0	0	0	0
205	0	0	1	0	1	0	0	0	0	0
206	0	0	1	0	1	0	0	0	0	0
207	0	0	1	0	1	0	0	0	0	0
208	0	0	1	0	1	0	0	0	0	0
209	0	0	1	0	1	0	0	0	0	0
210	0	0	1	0	1	0	0	0	0	0
211	0	0	1	0	1	0	0	0	0	0
212	0	0	1	0	1	0	0	0	0	0
213	0	0	1	0	1	0	0	0	0	0
214	0	0	1	0	1	0	0	0	0	0
215	0	0	1	0	1	0	0	0	0	0
216	0	0	1	0	1	0	0	0	0	0
217	0	0	1	0	1	0	0	0	0	0
218	0	0	1	0	1	0	0	0	0	0
219	0	0	1	0	1	0	0	0	0	0
220	0	0	1	0	1	0	0	0	0	0
221	0	0	1	0	1	0	0	0	0	0
222	0	0	1	0	1	0	0	0	0	0
223	0	0	1	0	1	0	0	0	0	0
224	0	0	1	0	1	0	0	0	0	0
225	0	0	1	0	1	0	0	0	0	0
226	0	0	1	0	1	0	0	0	0	0
227	0	0	1	0	1	0	0	0	0	0
228	0	0	1	0	1	0	0	0	0	0
229	0	0	1	0	1	0	0	0	0	0
230	0	0	1	0	1	0	0	0	0	0
231	0	0	1	0	1	0	0	0	0	0
232	0	0	1	0	1	0	0	0	0	0
233	0	0	1	0	1	0	0	0	0	0
234	0	0	1	0	1	0	0	0	0	0
235	0	0	1	0	1	0	0	0	0	0
236	0	0	1	0	1	0	0	0	0	0
237	0	0	1	0	1	0	0	0	0	0
238	0	0	1	0	1	0	0	0	0	0
239	0	0	1	0	1	0	0	0	0	0
240	0	0	1	0	1	0	0	0	0	0
241	0	0	1	0	1	0	0	0	0	0
242	0	0	1	0	1	0	0	0	0	0
243	0	0	1	0	1	0	0	0	0	0
244	0	0	1	0	1	0	0	0	0	0
245	0	0	1	0	1	0	0	0	0	0
246	0	0	1	0	1	0	0	0	0	0
247	0	0	1	0	1	0	0	0	0	0
248	0	0	1	0	1	0	0	0	0	0
249	0	0	1	0	1	0	0	0	0	0
250	0	0	1	0	1	0	0	0	0	0
251	0	0	1	0	1	0	0	0	0	0
252	0	0	1	0	1	0	0	0	0	0
253	0	0	1	0	1	0	0	0	0	0
254	0	0	1	0	1	0	0	0	0	0
255	0	0	1	0	1	0	0	0	0	0
256	0	0	1	0	1	0	0	0	0	0
257	0	0	1	0	1	0	0	0	0	0
258	0	0	1	0	1	0	0	0	0	0
259	0	0	1	0	1	0	0	0	0	0
260	0	0	1	0	1	0	0	0	0	0
261	0	0	1	0	1	0	0	0	0	0
262	0	0	1	0	1	0	0	0	0	0
263	0	0	1	0	1	0	0	0	0	0
264	0	0	1	0	1	0	0	0	0	0
265	0	0	1	0	1	0	0	0	0	0
266	0	0	1	0	1	0	0	0	0	0
267	0	0	1	0	1	0	0	0	0	0
268	0	0	1	0	1	0	0	0	0	0
269	0	0	1	0	1	0	0	0	0	0
270	0	0	1	0	1	0	0	0	0	0
271	0	0	1	0	1	0	0	0	0	0
272	0	0	1	0	1	0	0	0	0	0
273	0	0	1	0	1	0	0	0	0	0
274	0	0	1	0	1	0	0	0	0	0
275	0	0	1	0	1	0	0	0	0	0
276	0	0	1	0	1	0	0	0	0	0
277	0	0	1	0	1	0	0	0	0	0
278	0	0	1	0	1	0	0	0	0	0
279	0	0	1	0	1	0	0	0	0	0
280	0	0	1	0	1	0	0	0	0	0
281	0	0	2	0	1	0	0	0	0	0
282	0	0	2	0	1	0	0	0	0	0
283	0	0	2	0	1	0	0	0	0	0
284	0	0	2	0	1	0	0	0	0	0
285	0	0	2	0	1	0	0	0	0	0
286	0	0	2	0	1	0	0	0	0	0
287	0	0	2	0	1	0	0	0	0	0
288	0	0	2	0	1	0	0	0	0	0
289	0	0	2	0	1	0	0	0	0	0
290	0	0	2	0	1	0	0	0	0	0
291	0	0	2	0	1	0	0	0	0	0
292	0	0	2	0	1	0	0	0	0	0
293	0	0	2	0	1	0	0	0	0	0
294	0	0	2	0	1	0	0	0	0	0
295	0	0	2	0	1	0	0	0	0	0
296	0	0	2	0	1	0	0	0	0	0
297	0	0	2	0	1	0	0	0	0	0
298	0	0	2	0	1	0	0	0	0	0
299	0	0	2	0	1	0	0	0	0	0
300	0	0	2	0	1	0	0	0	0	0
301	0	0	2	0	1	0	0	0	0	0
302	0	0	2	0	1	0	0	0	0	0
303	0	0	2	0	1	0	0	0	0	0
304	0	0	2	0	1	0	0	0	0	0
305	0	0	2	0	1	0	0	0	0	0
306	0	0	2	0	1	0	0	0	0	0
307	0	0	2	0	1	0	0	0	0	0
308	0	0	2	0	1	0	0	0	0	0
309	0	0	2	0	1	0	0	0	0	0
310	0	0	2	0	1	0	0	0	0	0
311	0	0	2	0	1	0	0	0	0	0
312	0	0	2	0	1	0	0	0	0	0
313	0	0	2	0	1	0	0	0	0	0
314	0	0	2	0	1	0	0	0	0	0
315	0	0	2	0	1	0	0	0	0	0
316	0	0	2	0	1	0	0	0	0	0
317	0	0	2	0	1	0	0	0	0	0
318	0	0	2	0	1	0	0	0	0	0
319	0	0	2	0	1	0	0	0	0	0
320	0	0	2	0	1	0	0	0	0	0
321	0	0	2	0	1	0	0	0	0	0
322	0	0	2	0	1	0	0	0	0	0
323	0	0	2	0	1	0	0	0	0	0
324	0	0	2	0	1	0	0	0	0	0
325	0	0	2	0	1	0	0	0	0	0
326	0	0	2	0	1	0	0	0	0	0
327	0	0	2	0	1	0	0	0	0	0
328	0	0	2	0	1	0	0	0	0	0
329	0	0	2	0	1	0	0	0	0	0
330	0	0	2	0	1	0	0	0	0	0
331	0	0	2	0	1	0	0	0	0	0
332	0	0	2	0	1	0	0	0	0	0
333	0	0	2	0	1	0	0	0	0	0
334	0	0	2	0	1	0	0	0	0	0
335	0	0	2	0	1	0	0	0	0	0
336	0	0	2	0	1	0	0	0	0	0
337	0	0	2	0	1	0	0	0	0	0
338	0	0	2	0	1	0	0	0	0	0
339	0	0	2	0	1	0	0	0	0	0
340	0	0	2	0	1	0	0	0	0	0
341	0	0	2	0	1	0	0	0	0	0
342	0	0	2	0	1	0	0	0	0	0
343	0	0	2	0	1	0	0	0	0	0
344	0	0	2	0	1	0	0	0	0	0
345	0	0	2	0	1	0	0	0	0	0
346	0	0	2	0	1	0	0	0	0	0
347	0	0	2	0	1	0	0	0	0	0
348	0	0	2	0	1	0	0	0	0	0
349	0	0	2	0	1	0	0	0	0	0
350	0	0	2	0	1	0	0	0	0	0
351	0	0	2	0	1	0	0	0	0	0
352	0	0	2	0	1	0	0	0	0	0
353	0	0	2	0	1	0	0	0	0	0
354	0	0	2	0	1	0	0	0	0	0
355	0	0	2	0	1	0	0	0	0	0
356	0	0	2	0	1	0	0	0	0	0
357	0	0	2	0	1	0	0	0	0	0
358	0	0	2	0	1	0	0	0	0	0
359	0	0	2	0	1	0	0	0	0	0
360	0	0	2	0	1	0	0	0	0	0
361	0	0	2	0	1	0	1	0	0	0
362	0	0	2	0	1	0	1	0	0	0
363	0	0	2	0	1	0	1	0	0	0
364	0	0	2	0	1	0	1	0	0	0
365	0	0	2	0	1	0	1	0	0	0
366	0	0	2	0	1	0	1	0	0	0
367	0	0	2	0	1	0	1	0	0	0
368	0	0	2	0	1	0	1	0	0	0
369	0	0	2	0	1	0	1	0	0	0
370	0	0	2	0	1	0	1	0	0	0
371	0	0	2	0	1	0	1	0	0	0
372	0	0	2	0	1	0	1	0	0	0
373	0	0	2	0	1	0	1	0	0	0
374	0	0	2	0	1	0	1	0	0	0
375	0	0	2	0	1	0	1	0	0	0
376	0	0	2	0	1	0	1	0	0	0
377	0	0	2	0	1	0	1	0	0	0
378	0	0	2	0	1	0	1	0	0	0
379	0	0	2	0	1	0	1	0	0	0
380	0	0	2	0	1	0	1	0	0	0
381	0	0	2	0	1	0	1	0	0	0
382	0	0	2	0	1	0	1	0	0	0
383	0	0	2	0	1	0	1	0	0	0
384	0	0	2	0	1	0	1	0	0	0
385	0	0	2	0	1	0	1	0	0	0
386	0	0	2	0	1	0	1	0	0	0
387	0	0	2	0	1	0	1	0	0	0
388	0	0	2	0	1	0	1	0	0	0
389	0	0	2	0	1	0	1	0	0	0
390	0	0	2	0	1	0	1	0	0	0
391	0	0	2	0	1	0	1	0	0	0
392	0	0	2	0	1	0	1	0	0	0
393	0	0	2	0	1	0	1	0	0	0
394	0	0	2	0	1	0	1	0	0	0
395	0	0	2	0	1	0	1	0	0	0
396	0	0	2	0	1	0	1	0	0	0
397	0	0	2	0	1	0	1	0	0	0
398	0	0	2	0	1	0	1	0	0	0
399	0	0	2	0	1	0	1	0	0	0
400	0	0	2	0	1	0	1	0	0	0
401	0	0	2	0	1	0	1	0	0	0
402	0	0	2	0	1	0	1	0	0	0
403	0	0	2	0	1	0	1	0	0	0
404	0	0	2	0	1	0	1	0	0	0
405	0	0	2	0	1	0	1	0	0	0
406	0	0	2	0	1	0	1	0	0	0
407	0	0	2	0	1	0	1	0	0	0
408	0	0	2	0	1	0	1	0	0	0
409	0	0	2	0	1	0	1	0	0	0
410	0	0	2	0	1	0	1	0	0	0
411	0	0	2	0	1	0	1	0	0	0
412	0	0	2	0	1	0	1	0	0	0
413	0	0	2	0	1	0	1	0	0	0
414	0	1	2	0	1	0	1	0	0	0
415	0	1	2	0	1	0	1	0	0	0
416	0	1	2	0	1	0	1	0	0	0
417	0	1	2	0	1	0	1	0	0	0
418	0	1	2	0	1	0	1	0	0	0
419	0	1	2	0	1	0	1	0	0	0
420	0	1	2	0	1	0	1	0	0	0
421	0	1	2	0	1	0	1	0	0	0
422	0	1	2	0	1	0	1	0	0	0
423	0	1	2	0	1	0	1	0	0	0
424	0	1	2	0	1	0	1	0	0	0
425	0	1	2	0	1	0	1	0	0	0
426	0	1	2	0	1	0	1	0	0	0
427	0	1	2	0	1	0	1	0	0	0
428	0	1	2	0	1	0	1	0	0	0
429	0	1	2	0	1	0	1	0	0	0
430	0	1	2	0	1	0	1	0	0	0
431	0	1	2	0	1	0	1	0	0	0
432	0	1	2	0	1	0	1	0	0	0
433	0	1	2	0	1	0	1	0	0	0
434	0	1	2	0	1	0	1	0	0	0
435	0	1	2	0	1	0	1	0	0	0
436	0	1	2	0	1	0	1	0	0	0
437	0	1	2	0	1	0	1	0	0	0
438	0	1	2	0	1	0	1	0	0	0
439	0	1	2	0	1	0	1	0	0	0
440	0	1	2	0	1	0	1	0	0	0
441	0	1	2	0	1	0	1	0	0	0
442	0	1	2	0	1	0	1	0	0	0
443	0	1	2	0	1	0	1	0	0	0
444	0	1	2	0	1	0	1	0	0	0
445	0	1	2	0	1	0	1	0	0	0
446	0	1	2	0	1	0	1	0	0	0
447	0	1	2	0	1	0	1	0	0	0
448	0	1	2	0	1	0	1	0	0	0
449	0	1	2	0	2	0	1	0	0	0
450	0	1	2	0	2	0	1	0	0	0
451	0	1	2	0	2	0	1	0	0	0
452	0	1	2	0	2	0	1	0	0	0
453	0	1	2	0	2	0	1	0	0	0
454	0	1	2	0	2	0	1	0	0	0
455	0	1	2	0	2	0	1	0	0	0
456	0	1	2	0	2	0	1	0	0	0
457	0	1	2	0	2	0	1	0	0	0
458	0	1	2	0	2	0	1	0	0	0
459	0	1	2	0	2	0	1	0	0	0
460	0	1	2	0	2	0	1	0	0	0
461	0	1	2	0	2	0	1	0	0	0
462	0	1	2	0	2	0	1	0	0	0
463	0	1	2	0	2	0	1	0	0	0
464	0	1	2	0	2	0	1	0	0	0
465	0	1	2	0	2	0	1	0	0	0
466	0	1	2	0	2	0	1	0	0	0
467	0	1	2	0	2	0	1	0	0	0
468	0	1	2	0	2	0	1	0	0	0
469	0	1	2	0	2	0	1	0	0	0
470	0	1	2	0	2	0	1	0	0	0
471	0	1	2	0	2	0	1	0	0	0
472	0	1	2	0	2	0	1	0	0	0
473	0	1	2	0	2	0	1	0	0	0
474	0	1	2	0	2	0	1	0	0	0
475	0	1	2	0	2	0	1	0	0	0
476	0	1	2	0	2	0	1	0	0	0
477	0	1	2	0	2	0	1	0	0	0
478	0	1	2	0	2	0	1	0	0	0
479	0	1	2	0	2	0	1	0	0	0
480	0	1	2	0	2	0	1	0	0	0
481	0	1	2	0	2	0	1	0	0	0
482	0	1	2	0	2	0	1	0	0	0
483	0	1	2	0	2	0	1	0	0	0
484	0	1	2	0	2	0	1	0	0	0
485	0	1	2	0	2	0	1	0	0	0
486	0	1	2	0	2	0	1	0	0	0
487	0	1	2	0	2	0	1	0	0	0
488	0	1	2	0	2	0	1	0	0	0
489	0	1	2	0	2	0	1	0	0	0
490	0	1	2	0	2	0	1	0	0	0
491	0	1	2	0	2	0	1	0	0	0
492	0	1	2	0	2	0	1	0	0	0
493	0	1	2	0	2	0	1	0	0	0
494	0	1	2	0	2	0	1	0	0	0
495	0	1	2	0	2	0	1	0	0	0
496	0	1	2	0	2	0	1	0	0	0
497	0	1	2	0	2	0	1	0	0	0
498	0	1	2	0	2	0	1	0	0	0
499	0	1	2	0	2	0	1	0	0	0
500	0	1	2	0	2	0	1	0	0	0
501	0	1	2	0	2	0	1	0	0	0
502	0	1	2	0	2	0	1	0	0	0
503	0	1	2	0	2	0	1	0	0	0
504	0	1	2	0	2	0	1	0	0	0
505	0	1	2	0	2	0	1	0	0	0
506	0	1	2	0	2	0	1	0	0	0
507	0	1	2	0	2	0	1	0	0	0
508	0	1	2	0	2	0	1	0	0	0
509	0	1	2	0	2	0	1	0	0	0
510	0	1	2	0	2	0	1	0	0	0
511	0	1	2	0	2	0	1	0	0	0
512	0	1	2	0	2	0	1	0	0	0
513	0	1	2	0	2	0	1	0	0	0
514	0	1	2	0	2	0	1	0	0	0
515	0	1	2	0	2	0	2	0	0	0
516	0	1	2	0	2	0	2	0	0	0
517	0	1	2	0	2	0	2	0	0	0
518	0	1	2	0	2	0	2	0	0	0
519	0	1	2	0	3	0	2	0	0	0
520	0	1	2	0	3	0	2	0	0	0
521	0	1	2	0	3	0	2	0	0	0
522	0	1	2	0	3	0	2	0	0	0
523	0	1	2	0	3	0	2	0	0	0
524	0	1	2	0	3	0	2	0	0	0
525	0	1	2	0	3	0	2	0	0	0
526	0	1	2	0	3	1	2	0	0	0
527	0	1	2	0	3	1	2	0	0	0
528	0	1	2	0	3	1	2	0	0	0
529	0	1	2	0	3	1	2	0	0	0
530	0	1	2	0	3	1	2	0	0	0
531	0	1	2	0	3	1	2	0	0	0
532	0	1	2	0	3	1	2	0	0	0
533	0	1	2	0	3	1	2	0	0	1
534	0	1	2	0	3	1	2	0	0	1
535	0	1	2	0	3	1	2	0	0	1
536	0	1	2	0	3	1	2	0	0	1
537	0	1	2	0	3	1	2	0	0	1
538	0	1	2	0	3	1	2	0	0	1
539	0	1	2	0	3	1	2	0	0	1
540	0	1	2	0	3	1	2	0	0	1
541	0	1	2	0	3	1	2	0	0	1
542	0	1	2	0	3	1	2	0	0	1
543	0	1	2	0	3	1	2	0	0	1
544	0	1	2	0	3	1	2	0	0	1
545	0	1	2	0	3	1	2	0	0	1
546	0	1	2	0	3	1	2	0	0	1
547	0	1	2	0	3	1	2	0	0	1
548	0	1	2	0	3	1	2	0	0	1
549	0	1	2	0	3	1	2	0	0	1
550	0	1	2	0	3	1	2	0	0	1
551	0	1	2	0	3	1	2	0	0	1
552	0	1	2	0	3	1	2	0	0	1
553	0	1	2	0	3	1	2	0	0	1
554	0	1	2	0	3	1	2	0	0	1
555	0	1	2	0	3	1	2	0	0	1
556	0	1	2	0	3	1	2	0	0	1
557	0	1	2	0	3	1	2	0	0	1
558	0	1	2	0	3	1	2	0	0	1
559	0	1	2	0	3	1	2	0	0	1
560	0	1	2	0	3	1	2	0	0	1
561	0	1	2	0	3	1	2	0	0	1
562	0	1	2	0	3	1	2	0	0	1
563	0	1	2	0	3	1	2	0	0	1
564	0	1	2	0	3	1	2	0	0	1
565	0	1	2	0	3	1	2	0	0	1
566	0	1	2	0	3	1	2	0	0	1
567	0	1	2	0	3	1	2	0	0	1
568	0	1	2	0	3	1	2	0	0	1
569	0	1	2	0	3	1	2	0	0	1
570	0	1	2	0	3	1	2	0	0	1
571	0	1	2	0	3	1	2	0	0	1
572	0	1	2	0	3	1	2	0	0	1
573	0	1	2	0	3	1	2	0	0	1
574	0	1	2	0	3	1	2	0	0	1
575	0	1	2	0	3	2	2	0	0	1
576	0	1	2	0	3	2	2	0	0	1
577	0	1	2	0	3	2	2	0	0	1
578	0	1	2	0	3	2	2	0	1	1
579	0	1	2	0	3	2	2	0	1	1
580	0	1	2	0	3	2	2	0	1	1
581	0	1	2	0	3	2	2	0	1	1
582	0	1	2	0	3	2	2	0	1	1
583	0	1	2	0	3	2	2	0	1	1
584	0	1	2	0	3	2	2	0	1	1
585	0	1	2	0	3	2	2	0	1	1
586	0	1	2	0	3	2	2	0	1	1
587	0	1	2	0	3	2	2	0	1	1
588	0	1	2	0	3	2	2	0	1	1
589	0	1	2	0	3	2	2	0	1	1
590	0	1	2	0	3	2	2	0	1	1
591	0	1	2	0	3	2	2	0	1	1
592	0	1	2	0	3	2	2	0	1	1
593	0	1	2	0	3	2	2	0	1	1
594	0	1	2	0	3	2	2	0	1	1
595	0	1	2	0	3	2	2	0	1	1
596	0	1	2	0	3	2	2	0	1	1
597	0	1	2	0	3	2	2	0	1	1
598	0	1	2	0	3	2	2	0	1	1
599	0	1	2	0	3	2	2	0	1	1
600	0	1	2	0	3	2	2	0	1	1
601	0	1	2	0	3	2	2	0	1	1
602	0	1	2	0	3	2	2	0	1	1
603	0	1	2	0	3	2	2	0	1	1
604	0	1	2	0	3	2	2	0	1	1
605	0	1	2	0	3	2	2	0	1	1
606	0	1	2	0	3	2	3	0	1	1
607	0	1	2	0	3	2	3	0	1	1
608	0	1	2	0	3	2	3	0	1	1
609	0	1	2	0	3	2	3	0	1	1
610	0	1	2	0	3	2	3	0	1	1
611	0	1	2	0	3	2	3	0	1	1
612	0	1	2	0	3	2	3	0	1	1
613	0	1	2	0	4	2	3	0	1	1
614	0	1	2	0	4	2	3	0	1	1
615	0	1	2	0	4	2	3	0	1	1
616	0	1	2	0	4	2	3	0	1	1
617	0	1	2	0	4	2	3	0	1	1
618	0	1	2	0	4	2	3	0	1	1
619	0	1	2	0	4	2	3	0	1	1
620	0	1	2	0	4	2	3	0	1	1
621	0	1	2	0	4	2	3	0	1	1
622	0	1	2	0	4	2	3	0	1	1
623	0	1	2	0	4	2	3	0	1	1
624	0	1	2	0	4	2	3	0	1	1
625	0	1	2	0	4	2	3	0	1	1
626	0	1	2	0	4	2	3	0	1	1
627	0	1	2	0	4	2	3	0	1	1
628	0	1	2	0	4	2	3	0	1	1
629	0	1	2	0	4	2	3	0	1	1
630	0	1	2	0	4	2	3	0	1	1
631	0	1	2	0	4	2	3	0	1	1
632	0	1	2	0	4	2	3	0	1	1
633	0	1	2	0	4	2	3	0	1	1
634	0	1	2	0	4	2	3	0	1	1
635	0	1	2	0	4	2	3	0	1	1
636	0	1	2	0	4	2	3	0	1	1
637	0	1	2	0	4	2	3	0	1	1
638	0	1	2	0	4	2	3	0	1	1
639	0	1	2	0	4	2	3	0	1	1
640	0	1	2	0	4	2	3	0	1	1
641	0	1	2	0	4	2	3	0	1	2
642	0	1	2	0	4	2	3	0	1	2
643	0	1	2	0	4	2	3	0	1	2
644	0	1	2	0	4	2	3	0	1	2
645	0	1	2	0	4	2	3	0	1	2
646	0	1	2	0	4	2	3	0	1	2
647	0	1	2	0	4	2	3	0	1	2
648	0	1	2	0	4	2	3	0	1	2
649	0	1	2	0	4	2	3	0	1	2
650	0	1	2	0	4	2	3	0	1	2
651	0	1	2	0	4	2	3	0	1	2
652	0	1	2	0	4	2	3	0	1	2
653	0	1	2	0	4	2	3	0	1	2
654	0	1	2	0	4	2	3	0	1	2
655	0	2	2	0	4	2	3	0	1	2
656	0	2	2	0	4	2	3	0	1	2
657	0	2	2	0	4	2	3	0	1	2
658	0	2	2	0	4	2	3	0	1	2
659	0	2	2	0	4	2	3	0	1	2
660	0	2	2	0	4	2	3	0	1	2
661	0	2	2	0	4	2	3	0	1	2
662	0	2	2	0	4	2	3	0	1	2
663	0	2	2	0	4	2	3	0	1	2
664	0	2	2	0	4	2	3	0	1	2
665	0	2	2	0	4	2	3	0	1	2
666	0	2	2	1	4	2	3	0	1	2
667	0	2	2	1	4	2	3	0	1	2
668	0	2	2	1	4	2	3	0	1	2
669	0	2	2	1	4	2	3	0	1	2
670	0	2	2	1	4	2	3	0	1	2
671	0	2	2	1	4	2	3	0	1	2
672	0	2	2	1	4	2	3	0	1	2
673	0	2	2	1	4	2	3	0	1	2
674	0	2	2	1	4	2	3	0	1	2
675	0	2	2	1	4	2	3	0	1	2
676	0	2	2	1	4	2	3	0	1	2
677	0	2	2	1	4	2	3	0	1	2
678	0	2	2	1	4	2	3	0	1	2
679	0	2	2	1	4	2	3	0	1	2
680	0	2	2	1	4	2	3	0	1	2
681	0	2	2	1	4	2	3	0	1	2
682	0	2	2	1	4	2	3	0	1	2
683	0	2	2	1	4	2	3	0	1	2
684	0	2	2	1	4	2	3	0	1	2
685	0	2	2	1	4	2	3	0	1	2
686	0	2	2	1	4	2	3	0	1	2
687	0	2	2	1	4	2	3	0	1	2
688	0	2	2	1	4	2	3	0	1	2
689	0	2	2	1	4	2	3	0	1	2
690	0	2	2	1	4	2	3	0	1	2
691	0	2	2	1	4	2	3	0	1	2
692	0	2	2	1	4	2	3	0	1	2
693	0	2	2	1	4	2	3	0	1	2
694	0	2	2	1	4	2	3	0	1	2
695	0	2	2	1	4	2	3	0	1	2
696	0	2	2	1	4	2	3	0	1	2
697	0	2	2	1	4	2	3	0	1	2
698	0	2	2	1	4	2	3	0	1	2
699	0	2	2	1	4	2	3	0	1	2
700	0	2	2	1	4	2	3	0	1	2
701	0	2	2	1	4	2	3	0	1	2
702	0	2	2	1	4	2	3	0	1	2
703	0	2	2	1	4	2	3	0	1	2
704	0	2	2	1	4	2	3	0	1	2
705	0	2	2	1	4	2	3	0	1	2
706	0	2	2	1	4	2	3	0	1	2
707	0	2	2	1	4	2	3	0	1	2
708	1	2	2	1	4	2	3	0	1	2
709	1	2	2	1	4	2	3	0	1	2
710	1	2	2	1	4	2	3	0	1	2
711	1	2	2	1	4	2	3	0	1	2
712	1	2	2	1	4	2	3	0	1	2
713	1	2	2	1	4	2	3	0	1	2
714	1	2	2	1	4	2	3	0	1	2
715	1	3	2	1	4	2	3	0	1	2
716	1	3	2	1	4	2	3	0	1	2
717	1	3	2	1	4	2	3	0	1	2
718	1	3	2	1	4	2	3	0	1	2
719	1	3	2	1	4	2	3	0	1	2
720	1	3	2	1	4	2	3	0	1	2

## Sheet: TUMORS FEMALES
Experimental day	Number of tumors per group
females	Control isogenic	GMO 11% + R	GMO 22% + R	GMO 33% + R	GMO 11%	GMO 22%	GMO 33%	R (A)	R (B)	R (C)
0	0	0	0	0	0	0	0	0	0	0
1	0	0	0	0	0	0	0	0	0	0
2	0	0	0	0	0	0	0	0	0	0
3	0	0	0	0	0	0	0	0	0	0
4	0	0	0	0	0	0	0	0	0	0
5	0	0	0	0	0	0	0	0	0	0
6	0	0	0	0	0	0	0	0	0	0
7	0	0	0	0	0	0	0	0	0	0
8	0	0	0	0	0	0	0	0	0	0
9	0	0	0	0	0	0	0	0	0	0
10	0	0	0	0	0	0	0	0	0	0
11	0	0	0	0	0	0	0	0	0	0
12	0	0	0	0	0	0	0	0	0	0
13	0	0	0	0	0	0	0	0	0	0
14	0	0	0	0	0	0	0	0	0	0
15	0	0	0	0	0	0	0	0	0	0
16	0	0	0	0	0	0	0	0	0	0
17	0	0	0	0	0	0	0	0	0	0
18	0	0	0	0	0	0	0	0	0	0
19	0	0	0	0	0	0	0	0	0	0
20	0	0	0	0	0	0	0	0	0	0
21	0	0	0	0	0	0	0	0	0	0
22	0	0	0	0	0	0	0	0	0	0
23	0	0	0	0	0	0	0	0	0	0
24	0	0	0	0	0	0	0	0	0	0
25	0	0	0	0	0	0	0	0	0	0
26	0	0	0	0	0	0	0	0	0	0
27	0	0	0	0	0	0	0	0	0	0
28	0	0	0	0	0	0	0	0	0	0
29	0	0	0	0	0	0	0	0	0	0
30	0	0	0	0	0	0	0	0	0	0
31	0	0	0	0	0	0	0	0	0	0
32	0	0	0	0	0	0	0	0	0	0
33	0	0	0	0	0	0	0	0	0	0
34	0	0	0	0	0	0	0	0	0	0
35	0	0	0	0	0	0	0	0	0	0
36	0	0	0	0	0	0	0	0	0	0
37	0	0	0	0	0	0	0	0	0	0
38	0	0	0	0	0	0	0	0	0	0
39	0	0	0	0	0	0	0	0	0	0
40	0	0	0	0	0	0	0	0	0	0
41	0	0	0	0	0	0	0	0	0	0
42	0	0	0	0	0	0	0	0	0	0
43	0	0	0	0	0	0	0	0	0	0
44	0	0	0	0	0	0	0	0	0	0
45	0	0	0	0	0	0	0	0	0	0
46	0	0	0	0	0	0	0	0	0	0
47	0	0	0	0	0	0	0	0	0	0
48	0	0	0	0	0	0	0	0	0	0
49	0	0	0	0	0	0	0	0	0	0
50	0	0	0	0	0	0	0	0	0	0
51	0	0	0	0	0	0	0	0	0	0
52	0	0	0	0	0	0	0	0	0	0
53	0	0	0	0	0	0	0	0	0	0
54	0	0	0	0	0	0	0	0	0	0
55	0	0	0	0	0	0	0	0	0	0
56	0	0	0	0	0	0	0	0	0	0
57	0	0	0	0	0	0	0	0	0	0
58	0	0	0	0	0	0	0	0	0	0
59	0	0	0	0	0	0	0	0	0	0
60	0	0	0	0	0	0	0	0	0	0
61	0	0	0	0	0	0	0	0	0	0
62	0	0	0	0	0	0	0	0	0	0
63	0	0	0	0	0	0	0	0	0	0
64	0	0	0	0	0	0	0	0	0	0
65	0	0	0	0	0	0	0	0	0	0
66	0	0	0	0	0	0	0	0	0	0
67	0	0	0	0	0	0	0	0	0	0
68	0	0	0	0	0	0	0	0	0	0
69	0	0	0	0	0	0	0	0	0	0
70	0	0	0	0	0	0	0	0	0	0
71	0	0	0	0	0	0	0	0	0	0
72	0	0	0	0	0	0	0	0	0	0
73	0	0	0	0	0	0	0	0	0	0
74	0	0	0	0	0	0	0	0	0	0
75	0	0	0	0	0	0	0	0	0	0
76	0	0	0	0	0	0	0	0	0	0
77	0	0	0	0	0	0	0	0	0	0
78	0	0	0	0	0	0	0	0	0	0
79	0	0	0	0	0	0	0	0	0	0
80	0	0	0	0	0	0	0	0	0	0
81	0	0	0	0	0	0	0	0	0	0
82	0	0	0	0	0	0	0	0	0	0
83	0	0	0	0	0	0	0	0	0	0
84	0	0	0	0	0	0	0	0	0	0
85	0	0	0	0	0	0	0	0	0	0
86	0	0	0	0	0	0	0	0	0	0
87	0	0	0	0	0	0	0	0	0	0
88	0	0	0	0	0	0	0	0	0	0
89	0	0	0	0	0	0	0	0	0	0
90	0	0	0	0	0	0	0	0	0	0
91	0	0	0	0	0	0	0	0	0	0
92	0	0	0	0	0	0	0	0	0	0
93	0	0	0	0	0	0	0	0	0	0
94	0	0	0	0	0	0	0	0	0	0
95	0	0	0	0	0	0	0	0	0	0
96	0	0	0	0	0	0	0	0	0	0
97	0	0	0	0	0	0	0	0	0	0
98	0	0	0	0	0	0	0	0	0	0
99	0	0	0	0	0	0	0	0	0	0
100	0	0	0	0	0	0	0	0	0	0
101	0	0	0	0	0	0	0	0	0	0
102	0	0	0	0	0	0	0	0	0	0
103	0	0	0	0	0	0	0	0	0	0
104	0	0	0	0	0	0	0	0	0	0
105	0	0	0	0	0	0	0	0	0	0
106	0	0	0	0	0	0	0	0	0	0
107	0	0	0	0	0	0	0	0	0	0
108	0	0	0	0	0	0	0	0	0	0
109	0	0	0	0	0	0	0	0	0	0
110	0	0	0	0	0	0	0	0	0	0
111	0	0	0	0	0	0	0	0	0	0
112	0	0	0	0	0	0	0	0	0	0
113	0	0	0	0	0	0	0	0	0	0
114	0	0	0	0	0	0	0	0	0	0
115	0	0	0	0	0	0	0	0	0	0
116	0	0	0	0	0	0	0	0	0	0
117	0	0	0	0	0	0	0	0	0	0
118	0	0	0	0	0	0	0	0	0	0
119	0	0	0	0	0	0	0	0	0	0
120	0	0	0	0	0	0	0	0	0	0
121	0	0	0	0	0	0	0	0	0	0
122	0	0	0	0	0	0	0	0	0	0
123	0	0	0	0	0	0	0	0	0	0
124	0	0	0	0	0	0	0	0	0	0
125	0	0	0	0	0	0	0	0	0	0
126	0	0	0	0	0	0	0	0	0	0
127	0	0	0	0	0	0	0	0	0	0
128	0	0	0	0	0	0	0	0	0	0
129	0	0	0	0	0	0	0	0	0	0
130	0	0	0	0	0	0	0	0	0	0
131	0	0	0	0	0	0	0	0	0	0
132	0	0	0	0	0	0	0	0	0	0
133	0	0	0	0	0	0	0	0	0	0
134	0	0	0	0	0	0	0	0	0	0
135	0	0	0	0	0	0	0	0	0	0
136	0	0	0	0	0	0	0	0	0	0
137	0	0	0	0	0	0	0	0	0	0
138	0	0	0	0	0	0	0	0	0	0
139	0	0	0	0	0	0	0	0	0	0
140	0	0	0	0	0	0	0	0	0	0
141	0	0	0	0	0	0	0	0	0	0
142	0	0	0	0	0	0	0	0	0	0
143	0	0	0	0	0	0	0	0	0	0
144	0	0	0	0	0	0	0	0	0	0
145	0	0	0	0	0	0	0	0	0	0
146	0	0	0	0	0	0	0	0	0	0
147	0	0	0	0	0	0	0	0	0	0
148	0	0	0	0	0	0	0	0	0	0
149	0	0	0	0	0	0	0	0	0	0
150	0	0	0	0	0	0	0	0	0	0
151	0	0	0	0	0	0	0	0	0	0
152	0	0	0	0	0	0	0	0	0	0
153	0	0	0	0	0	0	0	0	0	0
154	0	0	0	0	0	0	0	0	0	0
155	0	0	0	0	0	0	0	0	0	0
156	0	0	0	0	0	0	0	0	0	0
157	0	0	0	0	0	0	0	0	0	0
158	0	0	0	0	0	0	0	0	0	0
159	0	0	0	0	0	0	0	0	0	0
160	0	0	0	0	0	0	0	0	0	0
161	0	0	0	0	0	0	0	0	0	0
162	0	0	0	0	0	0	0	0	0	0
163	0	0	0	0	0	0	0	0	0	0
164	0	0	0	0	0	0	0	0	0	0
165	0	0	0	0	0	0	0	0	0	0
166	0	0	0	0	0	0	0	0	0	0
167	0	0	0	0	0	0	0	0	0	0
168	0	0	0	0	0	0	0	0	0	0
169	0	0	0	0	0	0	0	0	0	0
170	0	0	0	0	0	0	0	0	0	0
171	0	0	0	0	0	0	0	0	0	0
172	0	0	0	0	0	0	0	0	0	0
173	0	0	0	0	0	0	0	0	0	0
174	0	0	0	0	0	0	0	0	0	0
175	0	0	0	0	0	0	0	0	0	0
176	0	0	0	0	0	0	0	0	0	0
177	0	0	0	0	0	0	0	0	0	0
178	0	0	0	0	0	0	0	0	0	0
179	0	0	0	0	0	0	0	0	0	0
180	0	0	0	0	0	0	0	0	0	0
181	0	0	0	0	0	0	0	0	0	0
182	0	0	0	0	0	0	0	0	0	0
183	0	0	0	0	0	0	0	0	0	0
184	0	0	0	0	0	0	0	0	0	0
185	0	0	0	0	0	0	0	0	0	0
186	0	0	0	0	0	0	0	0	0	0
187	0	0	0	0	0	0	0	0	0	0
188	0	0	0	0	0	0	0	0	0	0
189	0	0	0	0	0	0	0	0	0	0
190	0	0	0	0	0	0	0	0	0	0
191	0	0	0	0	0	0	0	0	0	0
192	0	0	0	0	0	0	0	0	0	0
193	0	0	0	0	0	0	0	0	0	0
194	0	0	0	0	0	0	0	0	0	0
195	0	0	0	0	0	0	0	0	0	0
196	0	0	0	0	0	0	0	0	0	0
197	0	0	0	0	0	0	0	0	0	0
198	0	0	0	0	0	0	0	0	0	0
199	0	0	0	0	0	0	0	0	0	0
200	0	0	0	0	0	0	0	0	0	0
201	0	0	0	0	0	0	0	0	0	0
202	0	0	0	0	0	0	0	0	0	0
203	0	0	0	0	0	0	0	0	0	0
204	0	0	0	0	0	0	0	0	0	0
205	0	0	0	0	0	0	0	0	1	0
206	0	0	0	0	0	0	0	0	1	0
207	0	0	0	0	0	0	0	0	1	0
208	0	0	0	0	0	0	0	0	1	0
209	0	0	0	0	0	0	0	0	1	0
210	0	0	0	0	0	0	0	0	1	0
211	0	0	0	0	0	0	0	0	1	0
212	0	0	0	0	0	0	0	0	1	0
213	0	0	0	0	0	0	0	0	1	0
214	0	0	0	0	0	0	0	0	1	0
215	0	0	0	0	0	0	0	0	1	0
216	0	0	0	0	0	0	0	0	1	0
217	0	0	0	0	0	0	0	0	1	0
218	0	0	0	0	0	0	0	0	1	0
219	0	0	0	0	0	0	0	0	1	0
220	0	0	0	0	0	0	0	0	1	0
221	0	0	0	0	0	0	0	0	1	0
222	0	0	0	0	0	0	0	0	1	0
223	0	0	0	0	0	0	0	0	1	0
224	0	0	0	0	0	0	0	0	1	0
225	0	0	0	0	0	0	0	0	1	0
226	0	0	0	0	0	0	0	0	1	0
227	0	0	0	0	0	0	0	0	1	0
228	0	0	0	0	0	0	0	0	1	0
229	0	0	0	0	0	0	0	0	1	0
230	0	0	0	0	0	0	0	0	1	0
231	0	0	0	0	0	0	0	0	1	0
232	0	0	0	0	0	0	0	0	1	0
233	0	0	0	0	0	0	0	0	1	0
234	0	0	0	0	0	0	0	0	1	0
235	0	0	0	0	0	0	0	0	1	0
236	0	0	0	0	0	0	0	0	1	0
237	0	0	0	0	0	0	0	0	1	0
238	0	0	0	0	0	0	0	0	1	0
239	0	0	0	0	0	0	0	0	1	0
240	0	0	0	0	0	0	0	0	1	0
241	0	0	0	0	0	0	0	0	1	0
242	0	0	0	0	0	0	0	0	1	0
243	0	0	0	0	0	0	0	0	1	0
244	0	0	0	0	0	0	0	0	1	0
245	0	0	0	0	0	1	0	0	1	0
246	0	0	0	0	0	1	0	0	1	0
247	0	0	0	0	0	1	0	0	1	0
248	0	0	0	0	0	1	0	0	1	0
249	0	0	0	0	0	1	0	0	1	0
250	0	0	0	0	0	1	0	0	1	0
251	0	0	0	0	0	1	0	0	1	0
252	0	0	0	0	0	1	0	0	1	0
253	0	0	0	0	0	1	0	0	1	0
254	0	0	0	0	0	1	0	0	1	0
255	0	0	0	0	0	1	0	0	1	0
256	0	0	0	0	0	1	0	0	1	0
257	0	0	0	0	0	1	0	0	1	0
258	0	0	0	0	0	1	0	0	1	0
259	0	0	0	0	0	1	0	0	1	0
260	0	0	0	0	0	1	0	0	1	0
261	0	0	0	0	0	1	0	0	1	0
262	0	0	0	0	0	1	0	0	1	0
263	0	0	0	0	0	1	0	0	1	0
264	0	0	0	0	0	1	0	0	1	0
265	0	0	0	0	0	1	0	0	1	0
266	0	0	0	0	0	1	0	0	1	0
267	0	0	0	0	0	1	0	0	1	0
268	0	0	0	0	0	1	0	0	1	0
269	0	0	0	0	0	1	0	0	1	0
270	0	0	0	0	0	1	0	0	1	0
271	0	0	0	0	0	1	0	0	1	0
272	0	0	0	0	0	1	0	0	1	0
273	0	0	0	0	0	1	0	0	1	0
274	0	0	0	0	0	1	0	0	1	0
275	0	0	0	0	0	1	0	0	1	0
276	0	0	0	0	0	1	0	0	1	0
277	0	0	0	0	0	1	0	0	1	0
278	0	0	0	0	0	1	0	0	1	0
279	0	0	0	0	0	1	0	0	1	0
280	0	0	0	0	0	1	0	0	1	0
281	0	0	0	0	0	1	0	0	1	0
282	0	0	0	0	0	1	0	0	1	0
283	0	0	0	0	0	1	0	0	1	0
284	0	0	0	0	0	1	0	0	1	0
285	0	0	0	0	0	1	0	0	1	0
286	0	0	0	0	0	1	0	0	1	0
287	0	0	0	0	0	1	0	1	1	0
288	0	0	0	0	0	1	0	1	1	0
289	0	0	0	0	0	1	0	1	1	0
290	0	0	0	0	0	1	0	1	1	0
291	0	0	0	0	0	1	0	1	1	0
292	0	0	0	0	0	1	0	1	1	0
293	0	0	0	0	0	1	0	1	1	0
294	0	0	0	0	0	1	0	1	1	0
295	0	0	0	0	0	1	0	1	1	0
296	0	0	0	0	0	1	0	1	1	0
297	0	0	0	0	0	1	0	1	1	0
298	0	0	0	0	0	1	0	1	1	0
299	0	0	0	0	0	1	0	1	1	0
300	0	0	0	0	0	1	0	1	1	0
301	0	0	0	0	0	1	0	1	1	0
302	0	0	0	0	0	1	0	1	1	0
303	0	0	0	0	0	1	0	1	1	0
304	0	0	0	0	0	1	0	1	1	0
305	0	0	0	0	0	1	0	1	1	0
306	0	0	0	0	0	1	0	1	1	0
307	0	1	0	0	0	1	0	1	1	0
308	0	1	0	0	0	1	0	1	1	0
309	0	1	0	0	0	1	0	1	1	0
310	0	1	0	0	0	1	0	1	1	0
311	0	1	0	0	0	1	0	1	1	0
312	0	1	0	0	0	1	0	1	1	0
313	0	1	0	0	0	1	0	1	1	0
314	0	1	0	0	0	1	0	1	1	0
315	0	1	0	0	0	1	0	1	1	0
316	0	1	0	0	0	1	0	1	1	0
317	0	1	0	0	0	1	0	1	1	0
318	0	1	0	0	0	1	0	1	1	0
319	0	1	0	0	0	1	0	1	1	0
320	0	1	0	0	0	1	0	1	1	0
321	0	1	0	0	0	1	0	1	1	0
322	0	1	0	0	0	1	1	1	1	0
323	0	1	0	0	0	1	1	1	1	0
324	0	1	0	0	0	1	1	1	1	0
325	0	1	0	0	0	1	1	1	1	0
326	0	1	0	0	0	1	1	1	1	0
327	0	1	0	0	0	1	1	1	1	0
328	0	1	0	0	0	1	1	1	1	0
329	0	1	0	0	0	1	1	1	1	0
330	0	1	0	0	0	1	1	1	1	0
331	0	1	0	0	0	1	1	1	1	0
332	0	1	0	0	0	1	1	1	1	0
333	0	1	0	0	0	1	1	1	1	0
334	0	1	0	0	0	1	1	1	1	0
335	0	1	0	0	0	1	1	1	1	0
336	0	1	0	0	0	1	1	1	1	0
337	0	1	0	0	0	1	1	1	1	0
338	0	1	0	0	0	1	1	1	1	0
339	0	1	0	0	0	1	1	1	1	0
340	0	1	0	0	0	1	1	1	1	0
341	0	1	0	0	0	1	1	1	1	0
342	0	1	0	0	0	1	1	1	1	0
343	0	1	0	0	0	1	1	1	1	0
344	0	1	0	0	0	1	1	1	1	0
345	0	1	0	0	0	1	1	1	1	0
346	0	1	0	0	0	1	1	1	1	0
347	0	1	0	0	0	1	1	1	1	0
348	0	1	0	0	0	1	1	1	1	0
349	0	1	0	0	0	1	1	1	1	0
350	0	1	0	0	0	1	1	1	1	0
351	0	1	0	0	0	1	1	1	1	0
352	0	1	0	0	0	1	1	1	1	0
353	0	1	0	0	0	1	1	1	1	0
354	0	1	0	0	0	1	1	1	1	0
355	0	1	0	0	0	1	1	1	1	0
356	0	1	0	0	0	1	1	1	1	0
357	0	1	0	0	0	1	1	1	1	0
358	0	1	0	0	0	1	1	1	1	0
359	0	1	0	0	0	1	1	1	1	0
360	0	1	0	0	0	1	1	1	1	0
361	0	1	0	0	0	1	1	1	1	0
362	0	1	0	0	0	1	1	1	1	0
363	0	1	0	0	0	1	1	1	1	0
364	0	1	0	0	0	1	1	1	1	0
365	0	1	0	0	0	1	1	1	1	0
366	0	1	0	0	0	1	1	1	1	0
367	0	1	0	0	0	1	1	1	1	0
368	0	1	0	0	0	1	1	1	1	0
369	0	1	0	0	0	1	1	1	1	0
370	0	1	0	0	0	1	1	1	1	0
371	0	1	0	0	0	1	1	1	1	0
372	0	1	0	0	0	1	1	1	1	0
373	0	1	0	0	0	1	1	1	1	0
374	0	1	0	0	0	1	1	1	1	0
375	0	1	0	0	0	1	1	1	1	0
376	0	1	0	0	0	1	1	1	1	0
377	0	1	0	0	0	1	1	1	1	0
378	0	1	1	0	0	1	2	1	1	0
379	0	1	1	0	0	1	2	1	1	0
380	0	1	1	0	0	1	2	1	1	0
381	0	1	1	0	0	1	2	1	1	0
382	0	1	1	0	0	1	2	1	1	0
383	0	1	1	0	0	1	2	1	1	0
384	0	1	1	0	0	1	2	1	1	0
385	0	1	1	0	0	1	2	1	1	0
386	0	1	1	0	0	1	2	1	1	0
387	0	1	1	0	0	1	2	1	1	0
388	0	1	1	0	1	1	2	1	1	0
389	0	1	1	0	1	1	2	1	1	0
390	0	1	1	0	1	1	2	1	1	0
391	0	1	1	0	1	1	3	1	1	0
392	0	1	1	0	1	1	3	1	1	0
393	0	1	1	0	1	1	3	1	1	0
394	0	1	1	0	1	1	3	1	1	0
395	0	1	1	0	1	1	3	1	1	0
396	0	1	1	0	1	1	3	1	1	0
397	0	1	1	0	1	1	3	1	1	0
398	0	1	1	0	1	2	3	1	1	0
399	0	1	1	0	1	2	3	1	1	0
400	0	1	1	0	1	2	3	1	1	0
401	0	1	1	0	1	2	3	1	1	0
402	0	1	1	0	1	2	3	1	1	0
403	0	1	1	0	1	2	3	1	1	0
404	0	1	1	0	1	2	3	1	1	0
405	0	1	2	0	1	2	3	1	1	0
406	0	1	2	0	1	2	3	1	1	0
407	0	1	2	0	1	2	3	1	1	0
408	0	1	2	0	1	2	3	1	1	0
409	0	1	2	0	1	2	3	1	1	1
410	0	1	2	0	1	2	3	1	1	1
411	0	1	2	0	1	2	3	1	1	1
412	0	1	2	0	1	2	3	1	1	1
413	0	1	2	0	1	3	3	1	1	1
414	0	1	2	0	1	3	3	1	1	1
415	0	1	2	0	1	3	3	1	1	1
416	0	1	2	0	1	3	3	1	1	1
417	0	1	2	0	1	3	3	1	1	1
418	0	1	2	0	1	3	3	1	1	1
419	0	1	2	0	1	3	3	1	1	1
420	0	1	2	0	1	3	3	1	1	2
421	0	1	2	0	1	3	3	1	1	2
422	0	1	2	0	1	3	3	1	1	2
423	0	1	2	0	1	3	3	1	1	2
424	0	1	2	0	1	3	3	1	1	2
425	0	1	2	0	1	3	3	1	1	2
426	0	1	2	0	1	3	3	1	1	2
427	1	1	2	0	1	3	3	1	2	2
428	1	1	2	0	1	3	3	1	2	2
429	1	1	2	0	1	3	3	1	2	2
430	1	1	2	0	1	3	3	1	2	2
431	1	1	2	0	1	3	3	1	2	2
432	1	1	2	0	1	3	3	1	2	2
433	1	1	2	0	1	3	3	1	2	2
434	1	1	2	0	1	3	3	1	2	2
435	1	1	2	0	1	3	3	1	2	2
436	1	1	2	0	1	3	3	1	2	2
437	1	1	2	0	1	3	3	1	2	2
438	1	1	2	0	1	3	3	1	2	2
439	1	1	2	0	1	3	3	1	2	2
440	1	1	2	0	1	3	3	1	2	2
441	1	1	2	0	1	3	3	1	2	2
442	1	1	2	0	1	3	3	1	2	2
443	1	1	2	0	1	3	3	1	2	2
444	1	1	2	0	1	3	3	1	2	2
445	1	1	2	0	1	3	3	1	2	2
446	1	1	2	0	1	3	3	1	2	2
447	1	1	2	0	1	3	3	1	2	2
448	1	1	2	0	1	3	3	1	2	2
449	1	1	2	0	1	3	3	1	2	2
450	1	1	2	0	1	3	3	1	2	2
451	1	1	3	1	1	3	3	1	3	2
452	1	1	3	1	1	3	3	1	3	2
453	1	1	3	1	1	3	3	1	3	2
454	1	1	3	1	1	3	3	1	3	2
455	1	1	3	1	1	3	3	1	3	2
456	1	1	3	1	1	3	3	1	3	2
457	1	1	3	1	1	3	3	1	3	2
458	1	1	3	1	1	4	3	1	3	2
459	1	1	3	1	1	4	3	1	3	2
460	1	1	3	1	1	4	3	1	3	2
461	1	1	3	1	1	4	3	1	3	2
462	1	1	3	1	1	4	3	1	3	2
463	1	1	3	1	1	4	3	1	3	2
464	1	1	3	1	1	4	3	1	3	2
465	1	1	3	1	1	4	3	1	3	2
466	1	1	3	1	1	4	3	1	3	2
467	1	1	3	1	1	4	3	1	3	2
468	1	1	3	1	1	4	3	1	3	2
469	1	1	3	1	1	4	3	2	3	2
470	1	1	3	1	1	4	3	2	3	2
471	1	1	3	1	1	4	3	2	3	2
472	1	1	3	1	1	4	3	2	3	2
473	1	1	3	1	1	4	3	2	3	2
474	1	1	3	1	1	4	3	2	3	2
475	1	1	3	1	1	4	3	2	3	2
476	1	1	3	1	1	4	3	2	3	2
477	1	1	3	1	1	4	3	2	3	2
478	1	1	3	1	1	4	3	2	3	2
479	1	1	3	1	1	4	3	2	3	2
480	1	1	3	1	1	4	3	2	3	2
481	1	1	3	1	1	4	3	2	3	2
482	1	1	3	1	1	4	3	2	3	2
483	1	1	4	1	1	5	3	2	3	2
484	1	1	4	1	1	5	3	2	3	2
485	1	1	4	1	1	5	3	2	3	2
486	1	1	4	1	1	5	3	5	3	2
487	1	1	4	1	1	5	3	5	3	2
488	1	1	4	1	1	5	3	5	3	2
489	1	1	4	1	1	5	3	5	3	2
490	1	1	4	2	2	5	3	5	3	2
491	1	1	4	2	2	5	3	5	3	2
492	1	1	4	2	2	5	3	5	3	2
493	1	1	4	2	2	5	3	5	3	2
494	1	1	4	2	2	5	3	5	3	2
495	1	1	4	2	2	5	3	5	3	2
496	1	1	4	2	2	5	3	5	3	2
497	1	1	4	2	2	5	3	5	3	2
498	1	1	4	2	2	5	3	5	3	2
499	1	1	4	2	2	5	3	5	3	2
500	1	1	4	2	3	5	3	5	3	2
501	1	1	4	2	3	5	3	5	3	2
502	1	1	4	2	3	5	3	5	3	2
503	1	1	4	2	3	5	3	5	3	2
504	1	1	4	2	3	5	3	6	5	2
505	1	1	4	2	3	5	3	6	5	2
506	1	1	4	2	3	5	3	6	5	2
507	1	1	4	2	4	5	3	6	5	2
508	1	1	4	2	4	5	3	6	5	2
509	1	1	4	2	4	5	3	6	5	2
510	1	1	4	2	4	5	3	6	5	2
511	1	2	5	2	4	5	3	6	5	3
512	1	2	5	2	4	5	3	6	5	3
513	1	2	5	2	4	5	3	6	5	3
514	1	2	5	2	4	5	3	6	5	3
515	1	2	5	2	4	5	3	6	5	3
516	1	2	5	2	4	5	3	6	5	3
517	1	2	5	2	4	5	3	6	5	3
518	2	2	6	3	4	5	3	6	5	3
519	2	2	6	3	4	5	3	6	5	3
520	2	2	6	3	4	5	3	6	5	3
521	2	2	6	3	4	5	3	6	5	3
522	2	2	6	3	4	5	3	6	5	3
523	2	2	6	3	4	5	3	6	5	3
524	2	2	6	3	4	5	3	6	5	3
525	2	2	6	5	4	5	3	6	5	4
526	2	2	6	5	4	5	3	6	5	4
527	2	2	6	5	4	5	3	6	5	4
528	2	2	6	5	4	5	3	6	5	4
529	2	2	6	5	4	5	3	6	5	4
530	2	2	6	5	4	5	3	6	5	4
531	2	2	6	5	4	5	3	6	5	4
532	2	2	6	5	5	5	3	6	5	4
533	2	2	6	5	5	5	3	6	5	4
534	2	2	6	5	5	5	3	6	5	4
535	2	2	6	5	5	5	3	6	5	5
536	2	2	6	5	5	5	3	6	5	5
537	2	2	6	5	5	5	3	6	5	5
538	2	2	6	5	5	5	3	6	5	5
539	2	2	6	5	5	6	3	6	5	5
540	2	2	6	5	5	6	3	6	5	5
541	2	2	6	5	5	6	3	6	5	5
542	2	2	6	5	6	6	3	7	5	5
543	2	2	6	5	6	6	3	7	5	5
544	2	2	6	5	6	6	3	7	5	5
545	2	2	6	5	6	6	3	7	5	5
546	3	3	6	6	6	6	3	8	5	5
547	3	3	6	6	6	6	3	8	5	5
548	3	3	6	6	6	6	3	8	5	5
549	3	3	6	6	6	6	3	8	5	5
550	3	3	6	6	6	6	3	8	5	5
551	3	3	6	6	6	6	3	8	5	5
552	3	3	6	6	6	6	3	8	5	5
553	3	3	6	6	6	6	3	8	5	5
554	3	3	6	6	6	6	3	8	5	5
555	3	3	6	6	6	6	3	8	5	5
556	3	3	6	6	6	6	3	8	5	5
557	3	3	6	6	6	6	3	8	5	5
558	3	3	6	6	6	6	3	8	5	5
559	3	3	6	6	6	6	3	8	5	5
560	3	3	6	6	6	6	3	8	6	5
561	3	3	6	6	6	6	3	8	6	5
562	3	3	6	6	6	6	3	8	6	5
563	3	3	6	6	6	6	3	8	6	5
564	3	3	6	6	6	6	3	8	6	5
565	3	3	6	6	6	6	3	8	6	5
566	3	3	6	6	6	6	3	8	6	5
567	3	3	6	6	6	6	3	8	6	5
568	3	3	6	6	6	6	3	8	6	5
569	3	3	6	6	6	6	3	8	6	5
570	3	3	7	6	6	6	3	8	6	5
571	3	3	7	6	6	6	3	8	6	5
572	3	3	7	6	6	6	3	8	6	5
573	3	3	7	6	6	6	3	8	6	5
574	3	3	7	6	6	6	3	8	6	5
575	3	3	7	6	6	6	3	8	6	5
576	3	3	7	6	6	6	3	8	6	5
577	3	4	7	6	6	6	3	8	6	6
578	3	4	7	6	6	6	3	8	6	6
579	3	4	7	6	6	6	3	8	6	6
580	3	4	7	6	6	6	3	8	6	6
581	3	4	7	6	6	6	3	8	6	6
582	3	4	7	6	6	6	3	8	6	6
583	3	4	7	6	6	6	3	8	6	6
584	3	4	7	6	6	6	3	8	6	6
585	3	4	7	6	6	6	3	8	6	6
586	3	4	7	6	6	6	3	8	6	6
587	3	4	7	6	6	6	3	8	6	6
588	3	4	7	6	7	7	3	9	7	6
589	3	4	7	6	7	7	3	9	7	6
590	3	4	7	6	7	7	3	9	7	6
591	3	4	7	6	7	7	4	10	7	6
592	3	4	7	6	7	7	4	10	7	6
593	3	4	7	6	7	7	4	10	7	6
594	3	4	7	6	7	7	4	10	7	6
595	3	4	7	6	7	7	4	10	7	6
596	3	4	7	6	7	7	4	10	7	6
597	3	4	7	6	7	7	4	10	7	6
598	3	4	7	6	7	7	4	10	7	6
599	3	4	7	6	7	7	4	10	7	6
600	3	4	7	6	7	7	4	10	7	6
601	3	4	7	6	7	7	4	10	7	6
602	3	4	8	6	7	7	4	10	7	6
603	3	4	8	6	7	7	4	10	7	6
604	3	4	8	6	7	7	4	10	7	6
605	3	4	8	6	7	7	4	10	7	6
606	3	4	8	6	7	7	4	10	7	6
607	3	4	8	6	7	7	4	10	7	6
608	3	4	8	6	7	7	4	10	7	6
609	3	4	8	6	8	7	4	11	7	6
610	3	4	8	6	8	7	4	11	7	6
611	3	4	8	6	8	7	4	11	7	6
612	3	4	8	6	8	7	4	11	7	6
613	3	4	8	6	8	7	4	11	7	6
614	3	4	8	6	8	7	4	11	7	6
615	3	4	8	6	8	7	4	11	7	6
616	3	4	8	6	8	7	4	11	7	6
617	3	4	8	6	8	7	4	11	7	6
618	3	4	8	6	8	7	4	11	7	6
619	3	4	8	6	8	7	4	11	7	6
620	3	4	8	6	8	7	4	11	7	6
621	3	4	8	6	8	7	4	11	7	6
622	3	4	8	6	8	7	4	11	7	6
623	3	4	8	6	8	7	4	11	7	6
624	3	4	8	6	8	7	4	11	7	6
625	3	4	8	6	8	7	4	11	7	6
626	3	4	8	6	8	7	4	11	7	6
627	3	4	8	6	8	7	4	11	7	6
628	3	4	8	6	8	7	4	11	7	6
629	3	4	8	6	8	7	4	11	7	6
630	3	5	8	6	8	7	5	11	7	7
631	3	5	8	6	8	7	5	11	7	7
632	3	5	8	6	8	7	5	11	7	7
633	3	5	8	6	8	7	5	11	8	7
634	3	5	8	6	8	7	5	11	8	7
635	3	5	8	6	8	7	5	11	8	7
636	3	5	8	6	8	7	5	11	8	7
637	4	5	8	6	8	7	5	12	8	7
638	4	5	8	6	8	7	5	12	8	7
639	4	5	8	6	8	7	5	12	8	7
640	4	5	8	6	8	7	5	12	8	7
641	4	5	8	6	8	7	5	12	8	7
642	4	5	8	6	8	7	5	12	8	7
643	4	5	8	6	8	7	5	12	8	7
644	4	5	8	6	8	7	5	12	8	7
645	4	5	8	6	8	7	5	12	8	7
646	4	5	8	6	8	7	5	12	8	7
647	4	5	8	6	8	7	5	12	8	8
648	4	5	8	6	8	7	5	12	8	8
649	4	5	8	6	8	7	5	12	8	8
650	4	5	8	6	8	7	5	12	8	8
651	4	5	8	6	8	7	5	12	8	8
652	4	5	8	6	8	7	5	12	8	8
653	4	5	8	6	8	7	5	12	8	8
654	4	5	8	6	8	7	5	12	8	8
655	4	5	8	6	8	7	5	12	8	8
656	4	5	8	6	8	7	5	12	8	8
657	4	5	8	6	8	7	5	12	8	8
658	4	5	8	6	8	7	5	12	8	8
659	4	5	8	6	8	7	5	12	8	8
660	4	5	8	6	8	7	5	12	8	8
661	4	6	8	6	8	7	5	12	8	8
662	4	6	8	6	8	7	5	12	8	8
663	4	6	8	6	8	7	5	12	8	8
664	4	6	8	6	8	7	5	12	8	8
665	4	6	8	6	8	7	5	12	9	8
666	4	6	8	6	8	7	5	12	9	8
667	4	6	8	6	8	7	5	12	9	8
668	4	6	9	6	8	7	5	12	9	8
669	4	6	9	6	8	7	5	12	9	8
670	4	6	9	6	8	7	5	12	9	8
671	4	6	9	6	8	7	5	12	9	8
672	4	6	9	6	8	7	5	12	9	8
673	4	6	9	6	8	7	5	12	9	8
674	4	6	9	6	8	7	5	12	9	8
675	4	6	9	6	8	7	5	12	9	8
676	4	6	9	6	8	7	5	12	9	8
677	4	6	9	6	8	7	5	12	9	8
678	4	6	9	6	8	7	5	12	9	8
679	4	6	9	6	8	7	5	12	9	8
680	4	6	9	6	8	7	5	12	9	8
681	4	6	9	6	8	7	5	12	9	8
682	4	6	9	6	8	7	5	13	9	8
683	4	6	9	6	8	7	5	13	9	8
684	4	6	9	6	8	7	5	13	9	8
685	4	6	9	6	8	7	5	13	9	8
686	4	6	9	6	8	7	5	13	9	9
687	4	6	9	6	8	7	5	13	9	9
688	4	6	9	6	8	7	5	13	9	9
689	4	6	9	7	9	7	6	13	9	9
690	4	6	9	7	9	7	6	13	9	9
691	4	6	9	7	9	7	6	13	9	9
692	4	6	9	7	9	7	6	13	9	9
693	4	6	9	7	9	7	6	13	9	9
694	4	6	9	7	9	7	6	13	9	9
695	4	6	9	7	9	7	6	13	9	9
696	4	6	9	7	10	7	7	13	10	11
697	4	6	9	7	10	7	7	13	10	11
698	4	6	9	7	10	7	7	13	10	11
699	4	6	9	7	10	7	7	13	10	11
700	4	6	9	7	10	7	9	13	11	11
701	4	6	9	7	10	7	9	13	11	11
702	4	6	9	7	10	7	9	13	11	11
703	4	6	9	8	10	7	9	13	11	11
704	4	6	9	8	10	7	9	13	11	11
705	4	6	9	8	10	7	9	13	11	11
706	4	6	9	8	10	7	9	13	11	11
707	4	7	9	8	10	7	9	14	12	11
708	4	7	9	8	10	7	9	14	12	11
709	4	7	9	8	10	7	9	14	12	11
710	4	7	9	8	10	7	10	14	12	11
711	4	7	9	8	10	7	10	14	12	11
712	4	7	9	8	10	7	10	14	12	11
713	4	7	9	8	10	7	10	14	12	11
714	5	7	9	8	10	7	10	14	12	12
715	5	7	9	8	10	7	10	14	12	12
716	5	7	9	8	10	7	10	14	12	12
717	6	7	9	8	10	7	10	14	12	12
718	6	7	9	8	10	7	10	14	12	12
719	6	7	9	8	10	7	10	14	12	12
720	6	7	9	8	10	7	10	14	12	12
