# Supplementary material for: Republished study: long-term toxicity of a Roundup herbicide and a Roundup-tolerantgenetically modified maize
Source: Springer Nature journal article supplement (doi:10.1186/s12302-014-0014-5), 2014-06-23
Supplement: 12302_2014_14_MOESM5_ESM.docx [file 12302_2014_14_MOESM5_ESM.docx]

| **File Name** | **Content** |
| --- | --- |
| Rats identifications | Chip number of the rats in the experiment |
| List of blood and urine parameters with sampling and units details | List of abbreviations for blood and urine parameters with sampling and units details |
| Biochemistry M15 | Biochemical parameters measurements at month 15 (**Figure 3**), abbreviations are detailed in the file named “List of blood and urine parameters with sampling and units details” |
| Mortality and tumors data | 4 Excel sheets with the number of tumors per group (**Figure 4**) and dead rats per group (**Figure 6**) for both sexes |
